# 1 Clustering of Cav1.3 L-type calcium channels by Shank3

2

3 Qian Yang<sup>1</sup>, Tyler L. Perfitt<sup>1,5</sup>, Juliana Quay<sup>2</sup>, Lan Hu<sup>1</sup>, Roger J. Colbran<sup>1,3,4</sup>

4

5 <sup>1</sup>Department of Molecular Physiology and Biophysics

6 <sup>2</sup>Chemical and Physical Biology

7 <sup>3</sup>Vanderbilt Brain Institute

8 <sup>4</sup>Vanderbilt-Kennedy Center for Research on Human Development,

9 Vanderbilt University School of Medicine, Nashville, TN, USA 37232-0615

10 <sup>5</sup>Current address: Rare Disease Research Unit, Pfizer Inc

11 Address correspondence to: Roger J. Colbran; Rm. 702 Light Hall, Vanderbilt University

12 School of Medicine, Nashville, TN 37232-0615 (Tel: 615-936-1630. Fax: 615-322-7236. Email:

13 [roger.colbran@vanderbilt.edu](mailto:roger.colbran@vanderbilt.edu))

14 ORCID IDs: Qian Yang, [0000-0001-9861-2790](https://orcid.org/0000-0001-9861-2790); Tyler L. Perfitt, [0000-0002-2381-3341](https://orcid.org/0000-0002-2381-3341); Juliana

15 Quay, [0000-0002-9100-6074](https://orcid.org/0000-0002-9100-6074); Roger J. Colbran, [0000-0001-7401-8244](https://orcid.org/0000-0001-7401-8244).

16

17

## 18 Abstract

19 Clustering of neuronal L-type voltage-gated Ca<sup>2+</sup> channels (LTCC) in the plasma membrane is  
20 increasingly implicated in creating highly localized Ca<sup>2+</sup> signaling nanodomains. For example,  
21 LTCC activation can increase phosphorylation of the nuclear CREB transcription factor by  
22 increasing Ca<sup>2+</sup> concentrations within a nanodomain close to the channel, without requiring  
23 bulk Ca<sup>2+</sup> increases in the cytosol or nucleus. However, the molecular basis for LTCC clustering is  
24 poorly understood. The postsynaptic scaffolding protein Shank3 specifically associates with one  
25 of the major neuronal LTCCs, the Cav1.3 calcium channel, and is required for optimal LTCC-  
26 dependent excitation-transcription coupling. Here, we co-expressed Cav1.3  $\alpha$ 1 subunits with  
27 two distinct epitope-tags with or without Shank3 in HEK cells. Co-immunoprecipitation studies  
28 using the cell lysates revealed that Shank3 can assemble multiple Cav1.3  $\alpha$ 1 subunits in a  
29 complex under basal conditions. Moreover, Cav1.3 LTCC complex formation was facilitated by  
30 Cav $\beta$  subunits ( $\beta$ 3 and  $\beta$ 2a), which also interact with Shank3. Shank3 interactions with Cav1.3  
31 LTCCs and multimeric Cav1.3 LTCC complex assembly were disrupted following addition of Ca<sup>2+</sup>  
32 and calmodulin (Ca<sup>2+</sup>/CaM) to cell lysates, perhaps simulating conditions within an activated  
33 Cav1.3 LTCC nanodomain. In intact HEK293T cells, co-expression of Shank3 enhanced the  
34 intensity of membrane-localized Cav1.3 LTCC clusters under basal conditions, but not after Ca<sup>2+</sup>  
35 channel activation. Live cell imaging studies also revealed that Ca<sup>2+</sup> influx through LTCCs  
36 disassociated Shank3 from Cav1.3 LTCCs clusters and reduced the Cav1.3 cluster intensity.  
37 Deletion of the PDZ domain from Shank3 prevented both binding to Cav1.3 and the changes in  
38 multimeric Cav1.3 LTCC complex assembly in vitro and in HEK293 cells. Finally, we found that  
39 shRNA knock-down of Shank3 expression in cultured rat primary hippocampal neurons reduced  
40 the intensity of surface-localized Cav1.3 LTCC clusters in dendrites. Taken together, our findings  
41 reveal a novel molecular mechanism contributing to neuronal LTCC clustering under basal  
42 conditions.

43

## 44 Introduction

45 Voltage-gated L-type calcium channels (LTCCs) are widely expressed in the central nervous  
46 system, endocrine cells, atrial myocytes, and cardiac pacemaker cells, and regulate numerous  
47 physiological processes (Catterall, 2011; Striessnig & Koschak, 2008). Clustering of the major  
48 neuronal LTCC subtypes,  $Ca_v1.2$  and  $Ca_v1.3$ , amplifies  $Ca^{2+}$  influx in local  $Ca^{2+}$  nanodomains  
49 (Dixon et al., 2012; Moreno et al., 2016; Navedo & Santana, 2013) that can be sufficient to  
50 initiate some downstream pathways, without requiring  $Ca^{2+}$  increases in the bulk cytosol or  
51 nucleus (Deisseroth et al., 1996; Stern, 1992; Tadross et al., 2013). Although the importance of  
52 LTCC clustering in creating these  $Ca^{2+}$  nanodomains has been recognized, the molecular basis  
53 for cluster formation remains poorly understood.

54  
55 LTCCs are comprised of a pore-forming  $\alpha 1$  subunit ( $Ca_v1.1-1.4$ ) that co-assembles with auxiliary  
56  $Ca_v\beta$ ,  $Ca_v\alpha 2\delta$  and  $Ca_v\gamma$  subunits (Simms & Zamponi, 2014). The C-terminal domains of  $Ca_v1.2$   
57 and  $Ca_v1.3$   $\alpha 1$  subunits play an important role in modulating LTCC cell surface expression and  
58 downstream signaling. For example, deletion of the C-terminal PDZ domain-interacting motif  
59 from  $Ca_v1.2$  or  $Ca_v1.3$  interferes with excitation-transcription (E-T) coupling (Weick et al., 2003;  
60 Zhang et al., 2005). Alternative mRNA splicing gives rise to long and short forms of the  $Ca_v1.3$   
61  $\alpha 1$  subunit C terminal domain ( $Ca_v1.3_{42}$  or  $Ca_v1.3_L$ ;  $Ca_v1.3_{42A}$  or  $Ca_v1.3_S$ ;  $Ca_v1.3_{43S}$ ), which  
62 functionally alter voltage- and  $Ca^{2+}$ -dependent gating properties (Bock et al., 2011; Hui et al.,  
63 1991; Moreno et al., 2016; Singh et al., 2008; Tan et al., 2011). Scaffolding proteins containing  
64 PDZ domains, such as Shank3, densin, and erbin interact with the C-terminal PDZ domain-  
65 interacting motif of  $Ca_v1.3_L$ , but not  $Ca_v1.2$  or  $Ca_v1.3_S$ , to differentially modulate the levels and  
66 pattern of cell surface  $Ca_v1.3_L$  expression and  $Ca_v1.3_L$  activity (Calin-Jageman et al., 2007;  
67 Jenkins et al., 2010; Stanika et al., 2016; Zhang et al., 2005). However,  $Ca_v1.3_L$  and  $Ca_v1.3_S$  were  
68 reported to form similar clusters in the plasma membrane that were estimated to contain an  
69 average of 8  $\alpha 1$  subunits in neurons (Moreno et al., 2016). Interestingly, calmodulin (CaM)  
70 binds to preIQ and IQ motifs in the C-terminal domain to facilitate cooperative channel opening  
71 of  $Ca_v1.3_S$ , but not  $Ca_v1.3_L$ , and  $Ca^{2+}$  influx (Moreno et al., 2016). Collectively these findings  
72 suggest an important role for the  $\alpha 1$  subunit C-terminal domain in regulating LTCC activity and  
73 surface expression, as well as E-T coupling.

74  
75 Of the PDZ-domain containing proteins that bind to the C-terminal domain of  $Ca_v1.3_L$ , Shank3  
76 has been most intensively studied, in part because it is a multi-domain postsynaptic scaffolding  
77 protein strongly linked to multiple neuropsychiatric disorders. Previous studies found that  
78 Shank3 facilitates synaptic  $Ca_v1.3_L$  surface expression (Zhang et al., 2006; Zhang et al., 2005)  
79 and is a dose-dependent regulator of calcium currents (Pym et al., 2017). In addition, Shank3 is  
80 required for normal downstream LTCC signaling to the nucleus (Perfitt et al., 2020; Pym et al.,  
81 2017; Zhang et al., 2006; Zhang et al., 2005). Although the C-terminal SAM domains of Shank3  
82 have been shown to mediate “tail-to-tail” multimerization (Sheng & Kim, 2000), potentially  
83 facilitating the assembly of larger multi-protein complexes, the role of Shank3 in  $Ca_v1.3$  LTCCs  
84 clustering is poorly understood.

85  
86 Here, we show that Shank3 facilitates the assembly of complexes containing multiple  $Ca_v1.3_L$   
87  $\alpha 1$  subunits *in vitro* and on the surface of intact HEK293 cells, and that clustering is further

88 enhanced by Cav $\beta$  subunits. This robust Shank3-dependent clustering under basal conditions is  
89 disrupted by the addition of Ca<sup>2+</sup>/CaM in vitro, or by LTCC activation in HEK cells. Moreover, we  
90 found that knock-down of Shank3 expression disrupted basal cell surface Cav1.3 clustering in  
91 the dendrites of cultured rat hippocampal neurons. Taken together, our data indicate that  
92 Shank3 assembles Cav1.3 LTCCs clusters under basal conditions, which may be important for  
93 downstream Ca<sup>2+</sup> signaling.

94

## 95 **Experimental procedures**

96

### 97 *DNA constructs*

98 Original sources of previously described DNA constructs are provided in the Key Resources  
99 Table. The Shank3 construct containing a deletion of the PDZ domain (GFP-Shank3- $\Delta$ PDZ) was  
100 generated by in-frame PCR deletion of the entire 270 bp region encoding <sup>572</sup>Iso-Val<sup>661</sup> from the  
101 parent GFP-Shank3 construct. Sequences of all constructs were confirmed by DNA sequencing.

102

### 103 *Culture and transfection of HEK cells*

104 HEK293 and HEK293T cells were grown at 37°C and 5% CO<sub>2</sub> in DMEM plus 10% (v/v) fetal  
105 bovine serum (Gibco), 1% (w/v) penicillin/streptomycin (Gibco), 1% (v/v) MEM non-essential  
106 amino acid solution (Sigma, catalog no. RNBK3078), and 1% GlutaMAX (Gibco, catalog no.  
107 2248970). Cells were co-transfected at ~70% confluence using Lipofectamine 2000 (Invitrogen).  
108 HA-Cav<sub>v</sub>1.3<sub>L</sub> and  $\alpha$ 2 $\delta$  with or without mCherry-Cav<sub>v</sub>1.3<sub>L</sub> were co-expressed with the empty Flag  
109 vector or vectors encoding FLAG- $\beta$ 3 or - $\beta$ 2a together with GFP or GFP-Shank3 (WT or with PDZ  
110 deletion), as indicated (ratio of  $\alpha$ 1:  $\alpha$ 2 $\delta$ :  $\beta$ : Shank3 was 3:1:1:1.5). For co-immunoprecipitation  
111 and GST pulldown experiments, HEK293T cells were transfected using a total of  $\leq$ 10  $\mu$ g of DNA  
112 per 10-cm culture dish (Corning, catalog no. 430167). The medium was completely changed 24  
113 h after transfection and cells were harvested after 48 h for co-immunoprecipitation or GST  
114 pulldown assay. For immunostaining and live-cell imaging, HEK293 cells, which generally  
115 express lower levels of recombinant proteins, were transfected with  $\leq$ 2  $\mu$ g of DNA per well of a  
116 6-well plate. Cells were re-plated at low density 24 h after transfection into a 24-well plate with  
117 12 $\times$ 12 mm<sup>2</sup> coverslips (Fisher Scientific, catalog no. 22293232) or into a 29 mm dish with 10  
118 mm bottom well (Cellvis, catalog no. D29-10-1.5-N) for live-cell imaging. Cells were grown for  
119 another 24-48 h before treatment and fixation, or live-cell imaging.

120

### 121 *Co-immunoprecipitation (Co-IP)*

122 Transfected cells were lysed in lysis buffer (50 mM Tris-HCl, 150 mM NaCl, 1 mM EDTA, 1 mM  
123 EGTA, 1 mM DTT, 1% Nonidet P-40 (v/v), 1 mM Microcystin-LR, and protease inhibitor  
124 mixtures). Cell lysates were homogenized (15-25 strokes) with Branson Sonifier 450 (VWR  
125 SCIENTIFIC) and then were cleared by low-speed centrifugation (500 x g). The supernatant was  
126 then incubated at 4°C for 4 h with rabbit anti-HA (Cell Signaling; 1:500; Figures 2A, 4B and 5A)  
127 or 1 h with rabbit anti-GFP (Thermo Fisher Scientific; 1:1000; Figure 3A) or for 2-3 h with mouse  
128 anti-Flag M2 antibody (Sigma; 1:500; Figure 3C) and 10  $\mu$ l of prewashed Dynabeads Protein A  
129 (Thermo Fisher Scientific, catalog no. 10002D; for rabbit antibodies) or Dynabeads Protein G  
130 (Thermo Fisher Scientific, catalog no. 10004D; for mouse antibodies). Where indicated, lysates  
131 were supplemented with 2 mM CaCl<sub>2</sub>, and 1  $\mu$ M calmodulin (final concentrations) during the

132 incubation. The beads were isolated magnetically and washed three times using lysis buffer  
133 before eluting proteins using 2X SDS-PAGE sample buffer.

134

#### 135 *GST pulldown*

136 GST-Shank3 constructs were created, expressed, and purified as previously described (Perfitt et  
137 al., 2020). Transfected cell supernatants (see above) were incubated at 4°C with ~150 nM of the  
138 indicated full-length GST fusion proteins (or GST control) and 10 µl prewashed glutathione  
139 magnetic beads for 1-2 h. Beads were then separated magnetically and washed three times  
140 with GST pulldown buffer (50 mM Tris-HCl pH 7.5; 200 mM NaCl; 1% (v/v) Triton X-100). GST  
141 protein complexes were eluted by incubation with 40 µl of 20 mM glutathione (pH 8.0) (Sigma)  
142 in GST pulldown buffer at 4°C for 10 min.

143

#### 144 *Western blot analysis*

145 Samples were resolved on 10% (Figures 1, 2, and 3A; Figure S1) or 7.5% (Figures 3C, 4 and 5)  
146 SDS-PAGE gels and transferred to nitrocellulose membrane (Protran, Camp Hill, PA). The  
147 membrane was blocked in blotting buffer containing 5% nonfat dry milk, 0.1% (v/v) Tween-20,  
148 in Tris-buffered saline (20 mM Tris, 136 mM NaCl) at pH 7.4 for 1 h at room temperature. The  
149 membrane was incubated at 4°C with primary antibody (see dilutions above) in blotting buffer  
150 overnight. After washing with washing buffer (0.1% (v/v) Tween 20 in Tris-buffered saline) two  
151 times (10 min/time), membranes were incubated with IR dye-conjugated (all replicates of GST-  
152 pulldown experiments and most replicates of Co-IP experiments) or HRP-conjugated secondary  
153 antibody (three replicates of the Co-IP experiments in Figure 5) for 1 h at room temperature  
154 and washed again before development. Secondary antibodies conjugated to infrared dyes (LI-  
155 COR Biosciences) were used for development with an Odyssey system (LI-COR Biosciences).  
156 Blots incubated with HRP-conjugated secondary antibodies were incubated with the Western  
157 Lightening Plus-ECL, enhanced chemiluminescent substrate (PerkinElmer, Waltham, MA) and  
158 visualized using Premium X-ray Film (Phenix Research Products, Candler, NC) exposed to be in  
159 the linear response range. Images were quantified using Fiji software (RRID: SCR\_003070).  
160 Background signals in equivalent areas from the negative control lanes were subtracted from  
161 signals in the experimental lanes. Similar results were obtained when the same samples were  
162 analyzed in parallel using ECL and Odyssey-based methods in some studies.

163

#### 164 *HEK cell stimulation, immunocytochemistry*

165 BayK 8644 (BayK) was prepared as a 50 mM stock solution in DMSO. For the experiment in  
166 Figure 8, HEK293 cells were incubated in HEPES buffer (150 mM NaCl, 5 mM KCl, 2 mM MgCl<sub>2</sub>,  
167 10 mM HEPES pH 7.4, 10 mM Glucose) for 10 min. Cells from different wells were then  
168 switched to each of these conditions: HEPES buffer + DMSO (0.02% v/v), HEPES buffer + BayK  
169 (10 µM), 2.5 mM Ca<sup>2+</sup> buffer (HEPES buffer + 2.5 mM CaCl<sub>2</sub>) + DMSO, or 2.5 mM Ca<sup>2+</sup> buffer +  
170 BayK for 10-15 min each. After a further 10-15 min, cells were fixed using ice-cold 4%  
171 paraformaldehyde containing 4% sucrose in 0.1 M Phosphate Buffer (pH 7.4) for 10 min. Cells  
172 expressing mCherry-Ca<sub>v</sub>1.3 and GFP or GFP-Shank3 (WT or ΔPDZ) (Figure 8) were washed three  
173 times with PBS after fixation and then mounted on slides using Prolong Gold Antifade  
174 Mountant.

175

176 *Total Internal Reflection Fluorescence (TIRF) Microscopy*

177 All HEK cell imaging was performed using a Nikon Multi Excitation TIRF microscope with a  
178 60x/1.49 n.a. TIRF objective (Nikon, Tokyo, Japan), Andor Xyla sCMOS camera (Andor, Belfast,  
179 UK); 405-, 488-, 561-, and 640 nm solid-state lasers (Nikon LU-N4); HS-625 high-speed emission  
180 filter wheel (Finger Lakes Instrumentation, Lima, NY); and standard filter sets. Images were  
181 acquired using NIS-Elements (Nikon) with the same exposure time of 30-100 ms for both  
182 channels and 3-5% laser power for 488 nm and 10-15% laser power of 561 nm. These  
183 parameters were kept the same for all cell imaging in the same replicate.

184  
185 For the long-term time-lapse imaging of live HEK293 cells, the live tissue chamber (TOKAI HIT,  
186 Japan) with atmosphere heater, stage heater, humidity, and CO<sub>2</sub> control was used. Perfect  
187 Focus (PFS) was on during the whole imaging session to hold the correct focal plane. The  
188 interval was set as 5 seconds, and the duration of each treatment (phase) was 2-3 minutes  
189 (Figure 7) or 5-10 min (Figure 6). In Figures 7, cells were first imaged in 0 Ca<sup>2+</sup> HEPES buffer (see  
190 above). Image collection was paused and the buffer was changed to HEPES buffer + 10 μM BayK  
191 for the 2<sup>nd</sup> imaging phase and then to 2.5 mM Ca<sup>2+</sup> buffer + 10 μM BayK for the 3<sup>rd</sup> imaging  
192 phase. The time gap between each phase was about one minute. The position of target cells  
193 was confirmed after each buffer change before re-starting image collection.

194  
195 All images were opened and processed in Fiji software. The GFP channel and the Polygon  
196 Selection tool were used to select the region of interest (ROIs) corresponding to the outline of  
197 the cell. The background was flattened and the mCherry-Ca<sub>v</sub>1.3 ROIs were thresholded based  
198 on the fluorescence signal. The threshold was defined using the mean intensity of mCherry plus  
199 two-times the standard deviation. Analyze Particles was used to calculate the intensity, area,  
200 and numbers of mCherry-Ca<sub>v</sub>1.3 clusters above the threshold. Cluster density was calculated  
201 using the cluster number divided by ROI area. For mCherry-Ca<sub>v</sub>1.3 intensity analysis in images  
202 of live cells, ROIs that include at least four mCherry clusters colocalized with GFP-Shank3 were  
203 used for quantification, and Analyze Particles was applied to all-time series. For colocalization  
204 analysis, GFP and mCherry channels were automatically thresholded before calculating the  
205 intensity correlation quotient (ICQ), which quantifies co-localization from complete segregation  
206 to perfect overlap on a -0.5 to +0.5 scale, as previously described (Li et al., 2004; Perfitt et al.,  
207 2020).

208  
209 *Tracking of mCherry-Ca<sub>v</sub>-1.3 LTCC clusters on the cell surface*

210 The motility of mCherry-tagged Ca<sub>v</sub>1.3 clusters with or without Shank3 co-expression was  
211 compared by automatic tracking using TrackMate in Fiji. LoG detector was used, and the  
212 estimated diameter of particles was set to 0.8 μm. Then, HyperStack Displayer was selected as  
213 the mode of viewer. Quality was added as a filter to rule out the background selection and  
214 spots color was set by mean intensity. Finally, Simple LAP Tracker was used, and the maximum  
215 frame gap was set to 2 (one or two missing time points were allowed while tracking). The  
216 linking and gap-closing maximum distance was adjusted individually depending on the  
217 observation of satisfactory trajectories from frame to frame by visual inspection to avoid false  
218 connections. The dynamic parameter (including track ID, displacement, duration, X, Y, Z

219 location, and mean speed of the event being tracked) of all tracks were exported from Fiji for  
220 further analysis.

221

### 222 *Primary hippocampal neuron cultures and immunocytochemistry*

223 Dissociated hippocampal neurons were prepared from E18 Sprague Dawley rat embryos, as  
224 previously described (Shanks et al., 2010). The brains from all the available embryos were  
225 dissected and pooled to prepare the cultures, so presumably, the cultures contain an ~50:50  
226 mix of neurons from male and female pups. Neurons were transfected at 14 days in vitro (DIV)  
227 using Lipofectamine 2000 following the manufacturer's directions (Thermo Fisher Scientific).  
228 sHA-Cav1.3,  $\alpha 2\delta$ , and FLAG- $\beta$  subunit ( $\beta 3$  or  $\beta 2a$ ) were co-transfected with GFP-nonsense  
229 shRNA (nssh) or GFP-Shank3-shRNA or GFP-Shank3 (ratio of  $\alpha 1$ :  $\alpha 2\delta$ :  $\beta$ : GFP was 3:1:1:1). A  
230 total of 1  $\mu$ g of DNA was transfected for each well of a 12-well plate for 2-3 hours before  
231 switching back to the conditioned medium. Neurons were used for immunostaining at DIV20-  
232 21. All procedures were pre-approved by the Vanderbilt University Institutional Animal Care  
233 and Use Committee and followed the National Institutes of Health Guide for the Care and Use  
234 of Laboratory Animals.

235

236 Neurons were live-stained for surface sHA-Cav1.3 labeling. Briefly, half of the conditioned  
237 medium (500  $\mu$ l) was collected for secondary antibody dilution and then the anti-HA antibody  
238 (1:200) was added into the remaining medium for 15-20 min (Stanika 2016). Neurons were  
239 quickly but carefully washed using prewarmed HBSS (Gibco) 3 times after primary antibody  
240 incubation. Neurons were incubated in the conditioned medium containing secondary  
241 antibodies (1:200) for another 15-20 min at 37°C. After three quick washes with prewarmed  
242 HBSS, neurons were immediately fixed using ice-cold 4% paraformaldehyde containing 4%  
243 sucrose in 0.1 M Phosphate Buffer pH 7.4 for 3 min and -20°C methanol for 10 minutes.  
244 Neurons were washed with PBS three times, and then permeabilized with PBS containing 0.2%  
245 Triton X-100, and then incubated with blocking solution (1X PBS, 0.1% Triton X-100 (v/v), 2.5%  
246 BSA (w/v), 5% Normal Donkey Serum (w/v), 1% glycerol (v/v)) at room temperature for 1 hour.  
247 Cells were then incubated with the blocking solution containing rabbit anti-Shank3 antibody  
248 overnight at 4°C. The following day, cells were washed three times in PBS containing 0.2%  
249 Triton X-100, then incubated with the blocking solution containing secondary antibody for 1  
250 hour at room temperature. After washing with PBS three times, cells were mounted on slides  
251 using Prolong Gold Antifade Mountant with DAPI.

252

### 253 *Neuronal imaging and quantification*

254 All neuronal imaging was performed using a 63x/1.40 Plan-APOCHROMAT oil lens as the  
255 primary objective on Zeiss LSM880 with AiryScan (Carl Zeiss Microscopy, Jena, Germany). The  
256 binocular lens was used to identify the transfected neurons based on GFP expression driven by  
257 the shRNA constructs. For whole-cell imaging, focal plane z stacks (0.3  $\mu$ m steps; 1.5-2.4  $\mu$ m  
258 range) were acquired. Fiji software (ImageJ, NIH) was used to merge a series of z stack images  
259 into one maximum intensity projection image.

260

261 The AiryScan module was used to maximize sensitivity and resolution for imaging surface  
262 localized sHA-Cav1.3 in neurons. The scanned area was 73.51 x 73.51  $\mu$ m. Images were opened

263 and quantified in Fiji (ImageJ, NIH). The GFP channel was used to select the regions of interest  
264 (ROIs) for measuring the numbers and intensity of sHA-Cav1.3 clusters. Analysis of somatic  
265 clusters was the same as in HEK cells. A 15–25  $\mu\text{m}$  segment of 2-3 secondary dendrites were  
266 selected for analysis which meet criteria: (1)  $> 50 \mu\text{m}$  away from the soma; (2) no other crossing  
267 dendrites; (3) similar thickness. After selecting the ROI, the background was subtracted and  
268 sHA-Cav1.3 ROIs were thresholded as for HEK cell analyses. Analyze Particles in Fiji was then  
269 used to measure the intensity, area, and numbers of the surface localized sHA-Cav1.3 clusters.  
270 In addition, a segmented line was used to measure the length of selected dendritic segments.  
271 Dendritic cluster density in each dendritic segment was calculated by dividing the total cluster  
272 number by the length, and then the average density across all dendritic segments was  
273 calculated for each neuron. A total of 6-10 neurons were analyzed per experiment, and 3-5  
274 independent experiments were performed using different batches of neurons.

275

### 276 *Statistical analysis*

277 Data are shown as mean  $\pm$  SEM, and n refers to the number of cells or independent  
278 experiments, as specified in each figure legend. Statistical analyses were performed in  
279 GraphPad Prism 8 software (GraphPad, La Jolla, CA, USA). For comparisons between two  
280 groups, Student's t-test or one-sample t-test was used. For comparisons between three or more  
281 samples, one-way ANOVA followed by Tukey's post hoc test was used. Comparisons between  
282 three or more groups with two independent variables were analyzed using two-way ANOVA  
283 followed by the post hoc tests recommended by Prism; all significant post hoc testing  
284 differences are defined as specific P values (correct to three decimal places) in the figures. All  
285 conditions statistically different from controls are indicated by p values labeled above columns  
286 in each figure. The complete output from Prism for each of the statistical analyses is provided in  
287 a supplementary Excel file (Supplementary Table 1).

288

## 289 **Results**

### 290 **Shank3-Cav1.3 interaction requires the Shank3 PDZ domain and Cav1.3 PDZ-binding motif**

291 Prior studies indicate that the Shank3 PDZ and SH3 domains interact directly with the C  
292 terminal-ITTL motif of Cav1.3<sub>L</sub> and an adjacent proline-rich region, respectively (Perfitt et al.,  
293 2020; Zhang et al., 2005). However, structural studies indicated that the Shank3 SH3 domain is  
294 atypical and has only weak (or no) interaction with multiple Cav1.3-based proline-rich peptides  
295 (Ishida et al., 2018; Ponna et al., 2017). In addition, an N-terminal extension to the Shank3 PDZ  
296 domain is critical for high-affinity interactions with GKAP (Zhou et al., 2016). Therefore, we  
297 further investigated the roles of the Shank3 SH3 and PDZ domains in interactions with Cav1.3<sub>L</sub>.

298

299 We generated five GST-Shank3 fusion proteins containing different segments of the amino acid  
300 sequence between residue 325 (N-terminal to the SH3 domain) to residue 664 (C-terminal to  
301 the PDZ domain) (Figure 1A). GST fusion proteins (or a GST negative control) were individually  
302 incubated with lysates of HEK293T cells expressing the entire C terminal domain of the Cav1.3<sub>L</sub>  
303  $\alpha 1$  subunit preceded by an HA epitope tag (HA-Cav1.3-CTD), and protein complexes were  
304 isolated using magnetic glutathione beads (Figure 1B). We detected similar robust binding of  
305 HA-Cav1.3-CTD to the three GST-Shank3 fusion proteins containing the PDZ domain; truncation  
306 of the SH3 domain or internal deletion of residues 543-564 (N-terminal PDZ extension) had no

307 substantial impact on the interaction. Moreover, we did not detect any interaction of the HA-  
308 Cav1.3-CTD with any fusion protein lacking the PDZ domain (containing only the SH3 domain).  
309 We then investigated interactions of a non-overlapping library of GST fusion proteins spanning  
310 the entire Shank3 protein with HA-tagged full-length Cav1.3<sub>L</sub> (Figure 1C). While full-length HA-  
311 Cav1.3<sub>L</sub> interacted with the GST-Shank3-PDZ domain, we did not detect interaction with any  
312 other GST-Shank3 fusion protein (Figure 1D). Taken together, these findings indicate that the  
313 Shank3 PDZ domain is primarily responsible for binding to Cav1.3<sub>L</sub>, and that the Shank3 SH3  
314 domain has a minimal role in the interaction.

315

### 316 **The presence of Cav $\beta$ subunits aids Shank3 assembly with Cav1.3 LTCCs**

317 Although Cav1.3<sub>L</sub> can directly bind to the Shank3 PDZ domain, it is possible that LTCC auxiliary  
318 subunits also play a role. Therefore, we investigated the impact of Cav $\beta$  subunits on the  
319 interaction by performing HA co-immunoprecipitation (co-IP) experiments from lysates of  
320 HEK293T cells expressing HA-Cav1.3<sub>L</sub>,  $\alpha 2\delta$ , with or without Flag-tagged  $\beta$  subunits (Flag- $\beta 3$  or  
321 Flag- $\beta 2a$ ), and either GFP or GFP-Shank3. Although GFP-Shank3 co-immunoprecipitated with  
322 HA-Cav1.3<sub>L</sub> in the absence of  $\beta$  subunits, co-expression of FLAG- $\beta 3$  or - $\beta 2a$  enhanced the co-  
323 precipitation of GFP-Shank3 (Figure 2A, B). Interestingly, while FLAG- $\beta 3$  significantly increased  
324 the co-precipitation of GFP-Shank3 by  $\sim 2$ -fold, FLAG- $\beta 2a$  had a significantly greater  $\sim 4$ -fold  
325 effect, even though FLAG- $\beta 3$  and - $\beta 2a$  were expressed at similar levels. Moreover, co-  
326 expression of GFP-Shank3 increased by 2-3-fold the amounts of HA-Cav1.3<sub>L</sub> that were  
327 immunoprecipitated relative to the GFP control, independent of whether or which  $\beta$  subunit  
328 was co-expressed. These data indicate that Shank3 indeed associates with the full length  
329 Cav1.3<sub>L</sub> and that  $\beta$  subunits may stabilize the interaction.

330

331 To further explore the role of  $\beta$  subunits in Cav1.3-Shank3 interaction, we incubated lysates of  
332 HEK293T cells expressing HA-Cav1.3 and  $\alpha 2\delta$  with or without  $\beta 3$  or  $\beta 2a$  subunit with GST or  
333 GST-Shank3-PDZ. As seen in Figure 1A, HA-Cav1.3 associated with GST-Shank3-PDZ on magnetic  
334 glutathione beads in the absence of  $\beta$  subunits. However, the co-expression of either FLAG- $\beta 2a$   
335 or FLAG- $\beta 3$  had no significant impact on the the amount of HA-Cav1.3 that associated with GST-  
336 Shank3-PDZ (Figure 2D, E). These data indicate that  $\beta$  subunits do not affect the direct  
337 interaction of the Cav1.3  $\alpha 1$  subunit with the Shank3 PDZ domain, suggesting that the ability of  
338  $\beta$  subunits to enhance full-length Shank3 co-immunoprecipitation with full length Cav1.3 (Figure  
339 2A, B) requires other domains in Shank3.

340

341 To test the hypothesis that Shank3 may interact with LTCCs  $\beta$  subunits in the absence of Cav1.3,  
342 we co-expressed FLAG- $\beta 3$  or - $\beta 2a$  in HEK293T cells with either full-length GFP-Shank3, GFP-  
343 Shank3- $\Delta$ PDZ (with an internal deletion of the PDZ domain) or a GFP control.

344 Immunoprecipitation using an anti-GFP antibody revealed that significantly more FLAG- $\beta 3$  than  
345 FLAG- $\beta 2a$  associated with full length GFP-Shank3, but that the amounts of co-precipitated  $\beta$   
346 subunit were unaffected by deletion of the PDZ domain (Figure 3A, B). However, reciprocal  
347 immunoprecipitations using a FLAG antibody indicated that similar amounts of full length GFP-  
348 Shank3 associated with FLAG- $\beta 3$  or FLAG- $\beta 2a$ . The amount of GFP-Shank3 associated with both  
349 FLAG- $\beta 3$  and FLAG- $\beta 2a$  appeared to be reduced by deletion of the PDZ domain (Figure 3C, D),  
350 but the reduction was not statistically significant in post hoc tests (Supplementary Table 1). In



351 an effort to determine which domains in Shank3 are sufficient for  $\beta$  subunit binding, we  
352 investigated the interaction of full-length FLAG- $\beta$ 3 or FLAG- $\beta$ 2a with our family of GST-Shank3  
353 fusion proteins (Figure 1C). However, we failed to detect interactions of either FLAG- $\beta$ 3 or  
354 FLAG- $\beta$ 2a with any of the GST-Shank3 fusion proteins (Supplemental Figure 1). Taken together,  
355 these data indicate that LTCC  $\beta$  subunits can associate with Shank3 independent of the Cav1.3  
356  $\alpha$ 1 subunit, and that this interaction does not strictly require the Shank3 PDZ domain, although  
357 there may be some modest quantitative effects. The interaction of Shank3 with  $\beta$  subunits may  
358 contribute to  $\beta$  subunit-dependent enhancement of Shank3 association with full-length Cav1.3  
359 observed in Figures 2A and 2B.

360

### 361 **The Shank3 PDZ domain mediates assembly of complexes containing multiple Cav1.3<sub>L</sub> LTCCs**

362 The amount of HA-Cav1.3<sub>L</sub> immunoprecipitated using an HA antibody was consistently  
363 increased by GFP-Shank3 co-expression, independent of the  $\beta$  subunit (Figure 2C). Since the HA  
364 antibody immunoprecipitated only a fraction of the total HA-Cav1.3<sub>L</sub> from these lysates, we  
365 hypothesized that this might be due to the clustering of multiple HA-Cav1.3<sub>L</sub> subunits by Shank3  
366 multimers (Naisbitt et al., 1999). To directly test this hypothesis (Figure 4A), we co-expressed  
367 mCherry-tagged Cav1.3 (mCherry-Cav1.3<sub>L</sub>) and HA-Cav1.3<sub>L</sub>, along with  $\alpha$ 2 $\delta$  and FLAG- $\beta$ 2a  
368 subunits and either GFP, GFP-Shank3, or GFP-Shank3- $\Delta$ PDZ. GFP-Shank3 specifically and  
369 efficiently co-precipitated with HA-Cav1.3<sub>L</sub> relative to the GFP control, and deletion of the PDZ  
370 domain significantly reduced the co-immunoprecipitation by  $\sim$ 80% (Figure 4B, C). Presumably,  
371 the residual co-immunoprecipitation of GFP-Shank3- $\Delta$ PDZ with HA-Cav1.3<sub>L</sub> is mediated by the  
372  $\beta$ 2a subunit. Notably, mCherry-Cav1.3 was readily detected in HA-immune complexes isolated  
373 from cells co-expressing GFP-Shank3, but only low levels of mCherry-Cav1.3 were detected in  
374 complexes isolated from cells co-expressing GFP or GFP-Shank3- $\Delta$ PDZ (Figure 4B, D). These data  
375 provide direct biochemical support for the hypothesis that Shank3 can cluster multiple Cav1.3<sub>L</sub>  
376 in a complex and that the PDZ domain is crucial for this clustering.

377

### 378 **Shank3-dependent in vitro clustering of Cav1.3<sub>L</sub> is disrupted by Ca<sup>2+</sup>/calmodulin.**

379 Next, we tested whether the assembly of mCherry-Cav1.3<sub>L</sub> with HA-Cav1.3<sub>L</sub> was affected by  
380 Ca<sup>2+</sup>/CaM. Lysates of cells co-expressing mCherry-Cav1.3<sub>L</sub>, HA-Cav1.3<sub>L</sub>,  $\alpha$ 2 $\delta$  and FLAG- $\beta$ 2a  
381 subunits with either GFP or GFP-Shank3 were HA-immunoprecipitated under basal conditions  
382 (with EDTA) or following the addition of Ca<sup>2+</sup>/CaM (Figure 5A). In GFP control cell lysates, the  
383 addition of Ca<sup>2+</sup>/CaM slightly increased the amount of mCherry-Cav1.3 detected in the HA-  
384 immune complexes in 5 out of 6 experiments, but the average  $\sim$ 1.5-fold increase was not  
385 statistically significant. As seen in Figure 4, the co-expression of GFP-Shank3 significantly  
386 increased the levels of mCherry-Cav1.3<sub>L</sub> detected in HA-immune complexes under basal (EDTA)  
387 conditions, but the addition of Ca<sup>2+</sup>/CaM significantly reduced the levels of co-precipitated  
388 mCherry-Cav1.3<sub>L</sub> (Figure 5B). Moreover, Ca<sup>2+</sup>/CaM addition also significantly reduced the levels  
389 of GFP-Shank3 that co-precipitated with HA-Cav1.3<sub>L</sub> (Figure 5C). These data demonstrate that  
390 the Shank3-dependent assembly of complexes containing multiple Cav1.3  $\alpha$ 1 subunits can be  
391 disrupted by the addition of Ca<sup>2+</sup>/CaM to cell lysates, potentially simulating conditions in close  
392 proximity to the activated LTCCs in the plasma membrane.

393

### 394 **Shank3 stabilizes Cav1.3 LTCCs in the plasma membrane under basal conditions *in situ***

395 As an initial test of the hypothesis that Shank3 clusters Cav1.3<sub>L</sub> in the plasma membrane, we  
396 used TIRF microscopy to detect fluorescent proteins residing within ~100 nm of the cover slip in  
397 live HEK293 cells co-expressing mCherry-Cav1.3<sub>L</sub>,  $\alpha 2\delta$  and  $\beta 2a/\beta 3$  subunits with either GFP or  
398 GFP-Shank3. We detected mCherry puncta in cells co-expressing GFP-Shank3, or the GFP  
399 control (Figure 6A), presumably predominantly reflecting LTCCs that had been trafficked to the  
400 plasma membrane. Moreover, GFP-Shank3 strongly colocalized with many of the mCherry-  
401 Cav1.3<sub>L</sub> puncta (Figure 6A). Notably, mCherry puncta were significantly more intense in cells  
402 expressing GFP-Shank3 than in GFP control cells (Figure 6B), consistent with the hypothesis that  
403 GFP-Shank3 increases the number of mCherry-tagged  $\alpha 1$  subunits within each puncta.  
404 Repeated imaging of these cells over 3-5 minutes indicated that mCherry-Cav1.3<sub>L</sub> clusters  
405 generally appeared transiently in the TIRF images of GFP control cells (Figure 6Ai), whereas in  
406 the presence of GFP-Shank3 most mCherry-Cav1.3<sub>L</sub> puncta in the TIRF images remained for the  
407 duration of the imaging session (Figure 6Aii). Moreover, mCherry-Cav1.3<sub>L</sub> puncta were quite  
408 motile within the plane of the plasma membrane in GFP control cells, moving at average speeds  
409 of ~0.25  $\mu\text{m/s}$ , whereas in cells expressing GFP-Shank3 they moved significantly slower (~0.1  
410  $\mu\text{m/s}$ ) (Figure 6D). Figures 6C and 6D summarize data from multiple experiments co-expressing  
411 either FLAG- $\beta 3$  (solid symbols) or FLAG- $\beta 2a$  (open symbols), indicating that the impact of GFP-  
412 Shank3 on mCherry-Cav1.3<sub>L</sub> is essentially independent of the identity of the  $\beta$  subunit. Taken  
413 together, these data are consistent with a model in which Shank3 stabilizes Cav1.3<sub>L</sub>  $\alpha 1$  subunit  
414 clusters in HEK293 cell plasma membranes.

415

#### 416 **The Shank3 PDZ domain mediates basal Cav1.3 clustering in intact cells**

417 We next tested for an effect of LTCC-mediated  $\text{Ca}^{2+}$  influx on mCherry-Cav1.3 clustering in  
418 transfected HEK293 cells co-expressing GFP-Shank3. LTCCs were activated pharmacologically  
419 using Bay K8644 (BayK) (10  $\mu\text{M}$ ) in the absence or presence of added extracellular  $\text{Ca}^{2+}$  while  
420 monitoring surface localized mCherry-Cav1.3<sub>L</sub> and GFP-Shank3 in single HEK293 cells by live-cell  
421 TIRF imaging. After collecting baseline data in a 0 mM  $\text{Ca}^{2+}$  buffer, cells were switched to 0 mM  
422  $\text{Ca}^{2+}$  buffer with BayK for several minutes, and then to 2.5 mM  $\text{Ca}^{2+}$  buffer with BayK. Figure 7A  
423 shows a single representative cell at  $t=0$ , and marks a region of interest containing co-localized  
424 mCherry-Cav1.3<sub>L</sub>/GFP-Shank3 clusters. The ratio of mCherry/GFP fluorescence in this region of  
425 interest was measured at 5 s intervals and plotted in Figure 8B under each of the buffer  
426 conditions, with about a one-minute gap as the buffer solutions were switched; the insets show  
427 images of the region of interest at selected time points. The mCherry/GFP ratio was relatively  
428 stable throughout the incubation with 0  $\text{Ca}^{2+}$ , in the absence or presence of BayK. However,  
429 addition of the  $\text{Ca}^{2+}$ /BayK buffer decreased the mCherry/GFP ratio within one minute of buffer  
430 changing, mainly due to a substantial reduction in the mCherry-Cav1.3<sub>L</sub> intensity (Figure 7C).  
431 Figure 7D shows the mCherry/GFP ratio from 12 cells in each of the three buffer conditions,  
432 normalized to the 0  $\text{Ca}^{2+}$  buffer, indicating that  $\text{Ca}^{2+}$  influx significantly reduces the intensity of  
433 mCherry-Cav1.3<sub>L</sub> clusters colocalized with GFP-Shank3.

434

435 In order to provide further insight into the role of Shank3 in Cav1.3 LTCC clustering *in situ*,  
436 HEK293 cells transfected with mCherry-Cav1.3 and GFP, GFP-Shank3, or GFP-Shank3- $\Delta\text{PDZ}$  were  
437 incubated for 10-15 min in a HEPES buffer containing 0 or 2.5 mM  $\text{Ca}^{2+}$ , in the absence or  
438 presence of BayK (Figure 8A), and then fixed for imaging using a TIRF microscope. As seen in live

439 HEK293 cells (Figures 6 and 7), mCherry-Cav1.3<sub>L</sub> puncta were readily detected near the cell  
440 surface under all conditions. We first quantified the puncta intensity (Figure 8B) and density  
441 (Figure 8C) under each incubation condition. In cells co-expressing GFP (gray circles/bars), both  
442 parameters were unaffected by incubation of the cells with or without extracellular Ca<sup>2+</sup> and/or  
443 BayK. The intensity of mCherry-Cav1.3<sub>L</sub> puncta was significantly increased ~2-fold by the co-  
444 expression of GFP-Shank3 (blue squares/bars) when cells were incubated in the absence of  
445 extracellular Ca<sup>2+</sup> (+/- BayK) or with Ca<sup>2+</sup> in the absence of BayK. However, incubation of cells  
446 expressing GFP-Shank3 with both Ca<sup>2+</sup> and BayK significantly reduced the mCherry-Cav1.3<sub>L</sub>  
447 puncta intensity to levels observed in GFP control cells. Notably, GFP-Shank3 co-expression had  
448 no effect on the mCherry-Cav1.3<sub>L</sub> puncta density, and the puncta density in cells expressing  
449 GFP-Shank3 was unaffected by the Ca<sup>2+</sup>/BayK incubations. Importantly, the co-expression of  
450 GFP-Shank3-ΔPDZ (red triangles/bars) had no significant effect on the intensity or density of  
451 mCherry-Cav1.3<sub>L</sub> puncta compared to the GFP control under any condition tested.

452  
453 In parallel, we quantified the co-localization of GFP signals with mCherry-Cav1.3<sub>L</sub> using the ICQ  
454 method (Figure 8D). The ICQ score in cells expressing soluble GFP and mCherry-Cav1.3<sub>L</sub> was  
455 very low (~0.05) under all conditions, as expected for mostly random overlap. In contrast, GFP-  
456 Shank3 significantly colocalized with mCherry-Cav1.3<sub>L</sub> puncta (ICQ ~0.25) when cells were pre-  
457 incubated in the absence of extracellular Ca<sup>2+</sup> (+/- BayK) or with Ca<sup>2+</sup> in the absence of BayK.  
458 However, the simultaneous addition of Ca<sup>2+</sup> and BayK significantly decreased the ICQ to ~0.15.  
459 Moreover, GFP-Shank3-ΔPDZ was only weakly co-localized with mCherry-Cav1.3<sub>L</sub> (ICQ ~ 0.15),  
460 independent of the specific cell incubation condition. Taken together, these data indicate that  
461 the Shank3 PDZ domain is essential for efficient colocalization with Cav1.3, and also for efficient  
462 Cav1.3 clustering under basal conditions, and that LTCC-mediated Ca<sup>2+</sup> influx disrupts the effect  
463 of Shank3.

### 464 465 **Endogenous Shank3 clusters Cav1.3<sub>L</sub> in cultured hippocampal neurons**

466 Previous over-expression studies in cultured neurons indicate that Shank3 interaction with the  
467 Cav1.3 C-terminal domain facilitates Cav1.3 LTCC surface expression in dendrites (Stanika et al.,  
468 2016; Zhang et al., 2006). However, the role of endogenous Shank3 has not been investigated.  
469 Therefore, we expressed Cav1.3<sub>L</sub> with an extra-cellular HA tag (sHA-Cav1.3), α2δ and either  
470 FLAG-β3 or -β2a, with or without a well-characterized highly effective and specific shRNA to  
471 knock down endogenous Shank3 expression (Perfitt et al., 2020; Verpelli et al., 2011). First, we  
472 confirmed the efficacy of Shank3 knockdown in DIV21 neurons that were co-transfected to  
473 express the LTCC subunits at DIV14. In non-transfected neurons (NT) or neurons expressing  
474 control nonsense shRNA (nssh), punctate staining for endogenous Shank3 was readily detected  
475 in the soma and dendrites (Supplemental Figure 2A), consistent with previous studies (Perfitt et  
476 al., 2020; Zhang et al., 2005). Moreover, the intensity of somatic Shank3 puncta was essentially  
477 identical in non-transfected neurons and neurons expressing the control RNA (nssh/NT ratios:  
478 1.19±0.14 and 1.14±0.12 in neurons co-expressing β3 and β2a subunits, respectively)  
479 (Supplemental Figure 2B). However, expression of the Shank3-shRNA (SK3-sh) significantly  
480 reduced the intensity of endogenous Shank3 fluorescence by ~80% (SK3-sh/NT ratios:  
481 0.28±0.04 and 0.17±0.03 in neurons co-expressing β3 and β2a subunits, respectively)  
482 (Supplemental Figure 2B). The high density of non-transfected dendrites in these

483 cultures/images precluded quantification of dendritic Shank3 levels in transfected neurons.  
484 These data confirm reliable knock down of Shank3 protein expression by the shRNA under the  
485 current experimental conditions, albeit with somewhat reduced efficacy than we observed  
486 previously in younger neurons (Perfitt et al., 2020).

487  
488 We then examined the impact of Shank3 knockdown on sHA-Cav1.3 cell surface expression.  
489 Consistent with previous studies (Moreno et al., 2016; Stanika et al., 2016; Zhang et al., 2016),  
490 we detected dense cell surface clusters of sHA-Cav1.3<sub>L</sub> in neurons expressing control shRNA,  
491 that were partially colocalized with endogenous Shank3 on the soma and dendrites (Figure 9A).  
492 The Shank3 shRNA clearly suppressed endogenous Shank3 staining in the soma and dendrites,  
493 but some residual Shank3 still colocalized with sHA-Cav1.3<sub>L</sub> clusters. Notably, Shank3  
494 knockdown significantly decreased the average intensity of sHA-Cav1.3<sub>L</sub> clusters in neuronal  
495 dendrites, when expressed with either FLAG-β3 (Figure 9C and Supplemental Figure 3B) or  
496 FLAG-β2a (Supplemental Figure 4C). However, there was only a trend for a decrease of somatic  
497 sHA-Cav1.3<sub>L</sub> cluster intensity (Figure 9B, Supplemental Figure 3A, and Supplemental Figure 4A).  
498 In contrast, Shank3 knockdown significantly reduced the density (number) of both somatic and  
499 dendritic sHA-Cav1.3<sub>L</sub> clusters when expressed with either FLAG-β3 (Figure 9B, C) or FLAG-β2a  
500 (Supplemental Figure 4). To explore if Shank3 specifically affects Cav1.3<sub>L</sub> LTCC clustering, we  
501 examined Cav1.2 LTCC cell surface expression with or without Shank3 knockdown (Figure 10).  
502 Surface sHA-Cav1.2 clusters were not strongly colocalized with endogenous Shank3 in control  
503 cells (Figure 10A), as expected because the Cav1.2 α1 subunit does not directly interact with  
504 Shank3 (Zhang et al., 2005). Neither the intensity nor the density of dendritic sHA-Cav1.2  
505 clusters were affected by Shank3 knockdown and the intensity of somatic Cav1.2 clusters also  
506 remained unchanged, although the density of somatic Cav1.2 clusters was modestly, but  
507 significantly, reduced by Shank3 knockdown (Figure 10B, C and Supplemental Figure 5A, B). In  
508 combination, these data indicate that endogenous Shank3 plays an important role in the  
509 dendritic clustering and overall surface expression of Cav1.3<sub>L</sub> LTCCs under basal conditions.

## 510 511 **Discussion**

512 Here we provide new insights into the role of Shank3 in controlling Cav1.3 LTCC clustering.  
513 Complementary co-immunoprecipitation and fluorescence microscopy studies using  
514 heterologous cells demonstrate that a direct interaction between the C-terminal domain of the  
515 Cav1.3 α1 subunit and the PDZ domain of Shank3 can mediate the clustering of multiple Cav1.3  
516 LTCCs. Our data also indicate that LTCC β3 or β2a auxiliary subunits facilitate Shank3 clustering  
517 of Cav1.3 LTCCs, perhaps by directly (or indirectly) interacting with Shank3 independent of the  
518 Cav1.3 α1 subunit. Significantly our data indicate Shank3-Cav1.3 association and Cav1.3  
519 clustering can be disrupted by increasing Ca<sup>2+</sup> and CaM in cell lysates, indicating that Cav1.3  
520 clustering can be dynamically modulated by LTCC activation. Finally, we confirmed prior studies  
521 showing that endogenous Shank3 partially colocalizes with plasma membrane Cav1.3 clusters in  
522 cultured hippocampal neurons, and we showed that Shank3 knockdown disrupted dendritic  
523 Cav1.3 clustering. Taken together, our data substantially advance our understanding of the role  
524 of Shank3 in Cav1.3 LTCC clustering.

525  
526 **The Shank3 PDZ domain mediates Cav1.3<sub>L</sub> LTCC clustering under basal conditions**

527 Shank proteins are multi-domain scaffolding proteins localized to excitatory synapses, where  
528 they coordinate the assembly of several multiprotein complexes (Naisbitt et al., 1999; Sheng &  
529 Hoogenraad, 2007; Sheng & Kim, 2000). It is well established that Shank PDZ domains can  
530 interact with multiple synaptic proteins, and deletion of the Shank3 PDZ domain in mice results  
531 in synaptic dysfunction and autism-related behavioral phenotypes (Peça et al., 2011),  
532 demonstrating the importance of the Shank3 PDZ domain interactions.

533  
534 Here, our in vitro studies using GST fusion proteins showed that the Shank3 PDZ domain is  
535 necessary and sufficient for binding to the C-terminal domain of Cav1.3<sub>L</sub> or to the full length  
536 Cav1.3<sub>L</sub> α1 subunit. In contrast to some prior reports, our data provided no indication that the  
537 Shank3 SH3 domain plays a significant role in this interaction (Zhang et al., 2005). The reasons  
538 for this discrepancy are unclear, but it is possible that a low affinity interaction of Cav1.3<sub>L</sub> with  
539 the SH3 domain (e.g., Ishida et al., 2018) could not be detected under our experimental  
540 conditions. These in vitro studies also indicated that β auxiliary subunits had a hitherto  
541 unappreciated role in facilitating Shank3 interactions with Cav1.3<sub>L</sub> LTCCs, apparently by also  
542 interacting with Shank3. However, preliminary in vitro studies (Supplementary Figure 1) failed  
543 to detect a direct interaction of either β2a or β3 with the PDZ domain or any other tested  
544 fragment of Shank3. Further studies are required to define the domains in Shank3 and the β  
545 subunit that mediate this interaction.

546  
547 We then adapted our co-immunoprecipitation assay to detect interactions between co-  
548 expressed Cav1.3<sub>L</sub> LTCCs with different epitope tags, demonstrating that Shank3 can mediate  
549 the assembly of complexes containing multiple Cav1.3<sub>L</sub> LTCCs, and that the Shank3 PDZ domain  
550 is essential for assembly of these complexes. We extended these studies to investigate the  
551 impact of Shank3 on Cav1.3<sub>L</sub> clustering in the plasma membrane of heterologous (HEK293) cells.  
552 TIRF microscopy provided no evidence that co-expression of Shank3 modulated cell surface  
553 expression levels (Cav1.3<sub>L</sub> puncta density) in HEK293 cells under basal cell incubation  
554 conditions. Rather, we found that Shank3 increased the average intensity (or brightness) of cell  
555 surface Cav1.3<sub>L</sub> puncta in both live-cell imaging studies (Figure 6) and in fixed cells (Figure 7).  
556 We interpret the increased signal intensity/brightness as an increase of the average number of  
557 mCherry-Cav1.3<sub>L</sub> α1 subunits within each puncta, or Cav1.3<sub>L</sub> LTCC clustering, and this increase  
558 was also dependent on the Shank3 PDZ domain. Prior cell biology studies have indicated that  
559 Cav1.3<sub>S</sub> and Cav1.3<sub>L</sub> variants can “self-cluster” in the plasma membrane, with each cluster  
560 containing an average of ~8 α1 subunits (Moreno et al., 2016). Thus, the Shank3-dependent  
561 clustering observed in our co-immunoprecipitation and cell imaging studies may represent  
562 higher-order assembly of intrinsic Cav1.3<sub>L</sub> clusters.

563  
564 Consistent with these biochemical and heterologous cell studies, we found that knocking down  
565 Shank3 expression in cultured neurons had a significant impact on expression of Cav1.3<sub>L</sub> (Figure  
566 9) but not Cav1.2 (Figure 10) in the plasma membrane. Shank3 knockdown significantly  
567 decreased the overall density of cell surface Cav1.3<sub>L</sub> puncta in both the soma and dendrites,  
568 indicating that Shank3 enhances cell surface expression of Cav1.3<sub>L</sub> LTCCs in neurons. Similar  
569 decreases in density were observed in neurons that co-expressed Cav1.3<sub>L</sub> with either the β2a or  
570 β3 subunits. These findings are consistent with prior reports indicating that Shank3 enhances

571 Cav1.3<sub>L</sub> trafficking to the neuronal plasma membrane (Zhang et al., 2006). However, Shank3  
572 knockdown also significantly decreased the intensity of surface Cav1.3<sub>L</sub> puncta in neuronal  
573 dendrites, but not in the soma, once again irrespective of the identity of the co-expressed β  
574 subunit. This observation indicates an additional dendritic role for Shank3 in increasing the  
575 number of Cav1.3<sub>L</sub> α1 subunits within each puncta. We interpret this observation as being  
576 consistent with the hypothesis that endogenous Shank3 promotes the clustering of Cav1.3<sub>L</sub>  
577 LTCCs in neuronal dendrites under basal culture conditions.

578

### 579 **Shank3 binding and Cav1.3<sub>L</sub> clustering is disrupted in the presence of Ca<sup>2+</sup>**

580 We also hypothesized that Cav1.3<sub>L</sub> clustering might be sensitive to increased Ca<sup>2+</sup>. Neuronal  
581 depolarization has been shown to enhance the physical and/or functional coupling of Cav1.2  
582 and Cav1.3<sub>S</sub> LTCCs (Dixon et al., 2015; Moreno et al., 2016), and some data indicate that  
583 Ca<sup>2+</sup>/CaM can induce homodimerization of Cav1.2 LTCCs (Fallon et al., 2009). However, we  
584 found that Ca<sup>2+</sup>/CaM addition to transfected HEK293 cell lysates dissociated Shank3 from  
585 Cav1.3<sub>L</sub> complexes and disrupted Shank-3 dependent co-immunoprecipitation of HA- and  
586 mCherry-tagged Cav1.3<sub>L</sub> (Figure 5). Moreover, we found that Shank3-colocalizes with Cav1.3<sub>L</sub> in  
587 HEK293 cell plasma membranes and Cav1.3<sub>L</sub> LTCCs clustering could be disrupted by the addition  
588 of both extracellular Ca<sup>2+</sup> and the LTCC agonist, BayK8644, but not by either Ca<sup>2+</sup> or BayK8644  
589 alone (Figures 7 and 8). These data suggest Ca<sup>2+</sup> influx via the LTCC itself causes these effects  
590 and that neither BayK8644-induced conformational changes (Marom et al., 2010) nor Ca<sup>2+</sup>  
591 influx via endogenous HEK293 cell channels is sufficient to disrupt Shank3-binding and LTCC  
592 clustering. Interestingly, the N- and C-terminal lobes of CaM interact with motifs in the N- and  
593 C-terminal tails of Cav1.3 LTCCs, respectively, in the presence of Ca<sup>2+</sup> (Banerjee et al., 2018; Ben  
594 Johnny et al., 2013). We speculate that these interactions result in conformational changes in the  
595 LTCC N- and C-terminal domains that interfere with binding of the Shank3 PDZ domain to the C-  
596 terminal ITTL motif of Cav1.3<sub>L</sub>.

597

### 598 **The potential roles of Cav1.3 channel clustering**

599 Activation of neuronal LTCCs has been suggested to create local Ca<sup>2+</sup> nanodomains near the  
600 plasma membrane that have privileged roles in initiating downstream signaling cascades, such  
601 as excitation-transcription coupling. It seems likely that the clustering of multiple LTCCs within a  
602 single complex facilitates the formation of Ca<sup>2+</sup> nanodomains that are larger or attain higher  
603 Ca<sup>2+</sup> concentrations, enhancing downstream signaling. In support of this notion, several  
604 different experimental approaches have indicated that Shank3 has a key role in facilitating  
605 Cav1.3 LTCC-induced excitation-transcription coupling. We suggest that this facilitation of E-T  
606 coupling is due to the Shank3-dependent Cav1.3<sub>L</sub> clustering reported here. Although it may  
607 seem somewhat paradoxical that Shank3-dependent Cav1.3<sub>L</sub> clustering is disrupted by Ca<sup>2+</sup>  
608 influx, several other mechanisms undoubtedly contribute to the control of LTCC clustering and  
609 the dynamics of Ca<sup>2+</sup> nanodomains. For example, clustering of Cav1.3<sub>S</sub> channels (which cannot  
610 bind Shank3) enhances Ca<sup>2+</sup> influx by allowing for Ca<sup>2+</sup>/CaM-dependent functional coupling  
611 within the cluster (Moreno et al., 2016). However, even though Cav1.3<sub>L</sub> LTCCs form clusters  
612 with similar physical dimensions, they do not seem to be regulated by this Ca<sup>2+</sup>/CaM-dependent  
613 functional coupling mechanism. Further studies will be required to develop a deeper  
614 understanding of the molecular mechanisms controlling the regulation of Cav1.3 splice variant

615 clustering and the physiological significance of clustering. Since genetic variants of Shank3 and  
616 LTCCs in humans are being increasingly linked to autism spectrum disorders, schizophrenia and  
617 other neuropsychiatric disorders (Gauthier et al., 2010; Guilmatre et al., 2014; Martínez-Rivera  
618 et al., 2017; Monteiro & Feng, 2017; Pinggera et al., 2015), such studies also may provide  
619 insight into the pathophysiology of these disorders.

620

#### 621 **Acknowledgements**

622 This work was supported by Vanderbilt University and an endowed Louise B. McGavock Chair to  
623 R.J.C., and by an AHA fellowship to TJP. The content is solely the responsibility of the authors  
624 and does not necessarily represent the official views of the National Institutes of Health.

625 Confocal imaging and analysis were performed in part through the use of the Vanderbilt Cell  
626 Imaging Shared Resource (supported by National Institutes of Health Grants CA68485,  
627 DK20593, DK58404, DK59637, and EY08126). We thank Drs. Craig Garner, Gerald Zamponi, Luk  
628 Van Parijs, and Diane Lipscombe for generously providing various original plasmids, as detailed  
629 in Key Resources Table.

630

#### 631 **Conflict of interest disclosure**

632 The authors declare that they have no competing interests.

633

#### 634 **Author contributions**

635 Q.Y. and R.J.C designed research; Q.Y. and T.L.P. performed biochemistry experiments; Q.Y.  
636 performed imaging experiments; L.H. prepared rat hippocampal neuronal cultures; Q.Y. and  
637 J.Q. analyzed data; Q.Y. and R.J.C. wrote the manuscript; J.Q. helped to modify the manuscript.  
638 All authors participated in the discussion, revision, and approval of the final manuscript.

639

640

641

642

643

644 **Key Resources Table**

645

| REAGENT or RESOURCE                         | SOURCE                                                                               | IDENTIFIER or GENBANK ACCESSION# |
|---------------------------------------------|--------------------------------------------------------------------------------------|----------------------------------|
| <b>Antibodies</b>                           |                                                                                      |                                  |
| rabbit monoclonal anti-HA (C29F4)           | Cell Signaling                                                                       | Cat# 3724S                       |
| mouse monoclonal anti-HA.11                 | BioLegend                                                                            | Cat# 901502                      |
| mouse monoclonal anti-mCherry (1C51)        | Novus Biologicals                                                                    | Cat# NBP-96752                   |
| mouse anti-GFP (clone 1C9A5)                | Vanderbilt Antibody and Protein Resource                                             |                                  |
| rabbit monoclonal anti-Shank3 (D5K6R)       | Cell Signaling                                                                       | Cat# 64555                       |
| mouse monoclonal anti-Flag M2               | Sigma                                                                                | Cat# F3165                       |
| rabbit anti-Flag M2                         | Cell Signaling                                                                       | Cat# 2368                        |
| mouse monoclonal anti-GST (clone D1 and D5) | Vanderbilt Antibody and Protein Resource                                             |                                  |
| HRP-conjugated anti-rabbit                  | Promega                                                                              | Cat# W4011                       |
| HRP-conjugated anti-mouse                   | Promega                                                                              | Cat# W4021                       |
| IR dye-conjugated donkey anti-mouse 800CW   | LI-COR Biosciences                                                                   | Cat# 926–32212                   |
| IR dye-conjugated donkey anti-rabbit 680LT  | LI-COR Biosciences                                                                   | Cat# 926–68023                   |
| rabbit monoclonal anti-HA (C29F4)           | Cell Signaling                                                                       | Cat# 3724S                       |
| rabbit monoclonal anti-Shank3 (D5K6R)       | Cell Signaling                                                                       | Cat# 64555                       |
| donkey anti-rabbit 647 Alexa Fluor 647      | Thermo Fisher Scientific                                                             | Cat# A-31573                     |
| donkey anti-mouse Alexa Fluor 546           | Thermo Fisher Scientific                                                             | Cat# A-10036                     |
| <b>DNA constructs</b>                       |                                                                                      |                                  |
| Ca <sub>v</sub> 1.3 α1                      | Rattus norvegicus                                                                    | AF370010                         |
| pCGNH (N-terminal HA tag)                   | (Wang et al., 2017)                                                                  |                                  |
| pmCherry-C1                                 | Xiaohan Wang created in the lab                                                      |                                  |
| pCGNO (external HA tag)                     | (Wang et al., 2017)<br>This construct was created according to (Altier et al., 2002) |                                  |



|                                     |                                 |                                |
|-------------------------------------|---------------------------------|--------------------------------|
| Cav $\alpha 2\delta$                | Oryctolagus cuniculus           | M21948                         |
| pCDNA                               | (Wang et al., 2017)             |                                |
| Cav $\beta 3$                       | Rattus norvegicus               | M88751                         |
| pCMV-Flag                           | (Wang et al., 2017)             |                                |
| Cav $\beta 2a$                      | Rattus norvegicus               | M80545                         |
| pCMV-Flag                           | (Wang et al., 2017)             |                                |
| Shank3                              | Rattus norvegicus               | a gift from Dr. Craig Garner   |
| EGFP-C1                             | (Perfitt et al., 2020)          |                                |
| pGEX4T-1                            | (Perfitt et al., 2020)          |                                |
| Cav1.2 $\alpha 1$                   | Rattus norvegicus               | a gift from Dr. Gerald Zamponi |
| pCGNO (external HA tag)*            | Xiaohan Wang created in the lab |                                |
| pLL3.7 (construct expressing shRNA) | (Dittgen et al., 2004)          | a gift from Dr. Luk Van Parijs |
| Nonsense shRNA                      | (Boudkkazi et al., 2014)        | 5'-TCGCTTGGGCGAGAGTAAG-3'      |
| Shank3 shRNA                        | (Verpelli et al., 2011)         | 5'-GGAAGTCACCAGAGGACAAGA-3'    |
| <b>Chemicals</b>                    |                                 |                                |
| Bay K8644                           | TOCRIS                          | Cat# 1544                      |
| DMSO                                | Sigma                           | D8418                          |
| <b>Cell lines</b>                   |                                 |                                |
| Human: HEK293T                      | ATCC                            | CRL-3216                       |
| Human: HEK293                       | ATCC                            | CRL-1573                       |

646  
647 \* A mutation (Lys<sup>2055</sup> mutated to Asn) was found in sHA-Cav1.2, which is 86 amino acids away  
648 from the end of C-terminus and didn't show an effect on the membrane location of Cav1.2  
649 LTCCs (Figure 10).

650  
651

652 References

- 653 Altier, C., Dubel, S. J., Barrère, C., Jarvis, S. E., Stotz, S. C., Spaetgens, R. L., . . . Bourinet, E.  
654 (2002). Trafficking of L-type calcium channels mediated by the postsynaptic scaffolding  
655 protein AKAP79. *J Biol Chem*, 277(37), 33598-33603.  
656 <https://doi.org/10.1074/jbc.M202476200>
- 657 Banerjee, R., Yoder, J. B., Yue, D. T., Amzel, L. M., Tomaselli, G. F., Gabelli, S. B., & Ben-Johny, M.  
658 (2018). Bilobal architecture is a requirement for calmodulin signaling to Ca. *Proc Natl*  
659 *Acad Sci U S A*, 115(13), E3026-E3035. <https://doi.org/10.1073/pnas.1716381115>
- 660 Ben Johny, M., Yang, P. S., Bazzazi, H., & Yue, D. T. (2013). Dynamic switching of calmodulin  
661 interactions underlies Ca<sup>2+</sup> regulation of Cav1.3 channels. *Nat Commun*, 4, 1717.  
662 <https://doi.org/10.1038/ncomms2727>
- 663 Bock, G., Gebhart, M., Scharinger, A., Jangsangthong, W., Busquet, P., Poggiani, C., . . . Koschak,  
664 A. (2011). Functional properties of a newly identified C-terminal splice variant of Cav1.3  
665 L-type Ca<sup>2+</sup> channels. *J Biol Chem*, 286(49), 42736-42748.  
666 <https://doi.org/10.1074/jbc.M111.269951>
- 667 Boudkkazi, S., Brechet, A., Schwenk, J., & Fakler, B. (2014). Cornichon2 dictates the time course  
668 of excitatory transmission at individual hippocampal synapses. *Neuron*, 82(4), 848-858.  
669 <https://doi.org/10.1016/j.neuron.2014.03.031>
- 670 Calin-Jageman, I., Yu, K., Hall, R. A., Mei, L., & Lee, A. (2007). Erbin enhances voltage-dependent  
671 facilitation of Ca(v)1.3 Ca<sup>2+</sup> channels through relief of an autoinhibitory domain in the  
672 Ca(v)1.3 alpha1 subunit. *J Neurosci*, 27(6), 1374-1385.  
673 <https://doi.org/10.1523/JNEUROSCI.5191-06.2007>
- 674 Catterall, W. A. (2011). Voltage-gated calcium channels. *Cold Spring Harb Perspect Biol*, 3(8),  
675 a003947. <https://doi.org/10.1101/cshperspect.a003947>
- 676 Deisseroth, K., Bitto, H., & Tsien, R. W. (1996). Signaling from synapse to nucleus: postsynaptic  
677 CREB phosphorylation during multiple forms of hippocampal synaptic plasticity. *Neuron*,  
678 16(1), 89-101. [https://doi.org/10.1016/s0896-6273\(00\)80026-4](https://doi.org/10.1016/s0896-6273(00)80026-4)
- 679 Dittgen, T., Nimmerjahn, A., Komai, S., Licznerski, P., Waters, J., Margrie, T. W., . . . Osten, P.  
680 (2004). Lentivirus-based genetic manipulations of cortical neurons and their optical and  
681 electrophysiological monitoring in vivo. *Proc Natl Acad Sci U S A*, 101(52), 18206-18211.  
682 <https://doi.org/10.1073/pnas.0407976101>
- 683 Dixon, R. E., Moreno, C. M., Yuan, C., Opitz-Araya, X., Binder, M. D., Navedo, M. F., & Santana, L.  
684 F. (2015). Graded Ca<sup>2+</sup>/calmodulin-dependent coupling of voltage-gated Cav1.2  
685 channels. *Elife*, 4. <https://doi.org/10.7554/eLife.05608>
- 686 Dixon, R. E., Yuan, C., Cheng, E. P., Navedo, M. F., & Santana, L. F. (2012). Ca<sup>2+</sup> signaling  
687 amplification by oligomerization of L-type Cav1.2 channels. *Proc Natl Acad Sci U S A*,  
688 109(5), 1749-1754. <https://doi.org/10.1073/pnas.1116731109>
- 689 Fallon, J. L., Baker, M. R., Xiong, L., Loy, R. E., Yang, G., Dirksen, R. T., . . . Quiocho, F. A. (2009).  
690 Crystal structure of dimeric cardiac L-type calcium channel regulatory domains bridged  
691 by Ca<sup>2+</sup>\* calmodulins. *Proc Natl Acad Sci U S A*, 106(13), 5135-5140.  
692 <https://doi.org/10.1073/pnas.0807487106>
- 693 Gauthier, J., Champagne, N., Lafrenière, R. G., Xiong, L., Spiegelman, D., Brustein, E., . . . Team,  
694 S. D. (2010). De novo mutations in the gene encoding the synaptic scaffolding protein

- 695 SHANK3 in patients ascertained for schizophrenia. *Proc Natl Acad Sci U S A*, 107(17),  
696 7863-7868. <https://doi.org/10.1073/pnas.0906232107>
- 697 Guilmatre, A., Huguet, G., Delorme, R., & Bourgeron, T. (2014). The emerging role of SHANK  
698 genes in neuropsychiatric disorders. *Dev Neurobiol*, 74(2), 113-122.  
699 <https://doi.org/10.1002/dneu.22128>
- 700 Hui, A., Ellinor, P. T., Krizanova, O., Wang, J. J., Diebold, R. J., & Schwartz, A. (1991). Molecular  
701 cloning of multiple subtypes of a novel rat brain isoform of the alpha 1 subunit of the  
702 voltage-dependent calcium channel. *Neuron*, 7(1), 35-44. [https://doi.org/10.1016/0896-  
703 6273\(91\)90072-8](https://doi.org/10.1016/0896-6273(91)90072-8)
- 704 Ishida, H., Skorobogatov, A., Yamniuk, A. P., & Vogel, H. J. (2018). Solution structures of the SH3  
705 domains from Shank scaffold proteins and their interactions with Cav1.3 calcium  
706 channels. *FEBS Lett*, 592(16), 2786-2797. <https://doi.org/10.1002/1873-3468.13209>
- 707 Jenkins, M. A., Christel, C. J., Jiao, Y., Abiria, S., Kim, K. Y., Usachev, Y. M., . . . Lee, A. (2010).  
708 Ca<sup>2+</sup>-dependent facilitation of Cav1.3 Ca<sup>2+</sup> channels by densin and Ca<sup>2+</sup>/calmodulin-  
709 dependent protein kinase II. *J Neurosci*, 30(15), 5125-5135.  
710 <https://doi.org/10.1523/JNEUROSCI.4367-09.2010>
- 711 Li, Q., Lau, A., Morris, T. J., Guo, L., Fordyce, C. B., & Stanley, E. F. (2004). A syntaxin 1,  
712 Galpha(o), and N-type calcium channel complex at a presynaptic nerve terminal:  
713 analysis by quantitative immunocolocalization. *J Neurosci*, 24(16), 4070-4081.  
714 <https://doi.org/10.1523/JNEUROSCI.0346-04.2004>
- 715 Marom, M., Hagalili, Y., Sebag, A., Tzvier, L., & Atlas, D. (2010). Conformational changes induced  
716 in voltage-gated calcium channel Cav1.2 by BayK 8644 or FPL64176 modify the kinetics  
717 of secretion independently of Ca<sup>2+</sup> influx. *J Biol Chem*, 285(10), 6996-7005.  
718 <https://doi.org/10.1074/jbc.M109.059865>
- 719 Martínez-Rivera, A., Hao, J., Tropea, T. F., Giordano, T. P., Kosovsky, M., Rice, R. C., . . .  
720 Rajadhyaksha, A. M. (2017). Enhancing VTA Cav1.3 L-type Ca<sup>2+</sup> channel activity promotes  
721 cocaine and mood-related behaviors via overlapping AMPA receptor mechanisms in the  
722 nucleus accumbens. *Mol Psychiatry*, 22(12), 1735-1745.  
723 <https://doi.org/10.1038/mp.2017.9>
- 724 Monteiro, P., & Feng, G. (2017). SHANK proteins: roles at the synapse and in autism spectrum  
725 disorder. *Nat Rev Neurosci*, 18(3), 147-157. <https://doi.org/10.1038/nrn.2016.183>
- 726 Moreno, C. M., Dixon, R. E., Tajada, S., Yuan, C., Opitz-Araya, X., Binder, M. D., & Santana, L. F.  
727 (2016). Ca(2+) entry into neurons is facilitated by cooperative gating of clustered Cav1.3  
728 channels. *Elife*, 5. <https://doi.org/10.7554/eLife.15744>
- 729 Naisbitt, S., Kim, E., Tu, J. C., Xiao, B., Sala, C., Valtschanoff, J., . . . Sheng, M. (1999). Shank, a  
730 novel family of postsynaptic density proteins that binds to the NMDA receptor/PSD-  
731 95/GKAP complex and cortactin. *Neuron*, 23(3), 569-582.  
732 [https://doi.org/10.1016/s0896-6273\(00\)80809-0](https://doi.org/10.1016/s0896-6273(00)80809-0)
- 733 Navedo, M. F., & Santana, L. F. (2013). Cav1.2 sparklets in heart and vascular smooth muscle. *J*  
734 *Mol Cell Cardiol*, 58, 67-76. <https://doi.org/10.1016/j.yjmcc.2012.11.018>
- 735 Perfitt, T. L., Wang, X., Dickerson, M. T., Stephenson, J. R., Nakagawa, T., Jacobson, D. A., &  
736 Colbran, R. J. (2020). Neuronal L-Type Calcium Channel Signaling to the Nucleus  
737 Requires a Novel CaMKII $\alpha$ -Shank3 Interaction. *J Neurosci*, 40(10), 2000-2014.  
738 <https://doi.org/10.1523/JNEUROSCI.0893-19.2020>

- 739 Peça, J., Feliciano, C., Ting, J. T., Wang, W., Wells, M. F., Venkatraman, T. N., . . . Feng, G. (2011).  
740 Shank3 mutant mice display autistic-like behaviours and striatal dysfunction. *Nature*,  
741 472(7344), 437-442. <https://doi.org/10.1038/nature09965>
- 742 Pinggera, A., Lieb, A., Benedetti, B., Lampert, M., Monteleone, S., Liedl, K. R., . . . Striessnig, J.  
743 (2015). CACNA1D de novo mutations in autism spectrum disorders activate Cav1.3 L-  
744 type calcium channels. *Biol Psychiatry*, 77(9), 816-822.  
745 <https://doi.org/10.1016/j.biopsych.2014.11.020>
- 746 Ponna, S. K., Myllykoski, M., Boeckers, T. M., & Kursula, P. (2017). Structure of an  
747 unconventional SH3 domain from the postsynaptic density protein Shank3 at ultrahigh  
748 resolution. *Biochem Biophys Res Commun*, 490(3), 806-812.  
749 <https://doi.org/10.1016/j.bbrc.2017.06.121>
- 750 Pym, E., Sasidharan, N., Thompson-Peer, K. L., Simon, D. J., Anselmo, A., Sadreyev, R., . . .  
751 Kaplan, J. M. (2017). Shank is a dose-dependent regulator of CaV1 calcium current and  
752 CREB target expression. *Elife*, 6. <https://doi.org/10.7554/eLife.18931>
- 753 Shanks, N. F., Maruo, T., Farina, A. N., Ellisman, M. H., & Nakagawa, T. (2010). Contribution of  
754 the global subunit structure and stargazin on the maturation of AMPA receptors. *J*  
755 *Neurosci*, 30(7), 2728-2740. <https://doi.org/10.1523/JNEUROSCI.5146-09.2010>
- 756 Sheng, M., & Hoogenraad, C. C. (2007). The postsynaptic architecture of excitatory synapses: a  
757 more quantitative view. *Annu Rev Biochem*, 76, 823-847.  
758 <https://doi.org/10.1146/annurev.biochem.76.060805.160029>
- 759 Sheng, M., & Kim, E. (2000). The Shank family of scaffold proteins. *J Cell Sci*, 113 ( Pt 11), 1851-  
760 1856. <https://doi.org/10.1242/jcs.113.11.1851>
- 761 Simms, B. A., & Zamponi, G. W. (2014). Neuronal voltage-gated calcium channels: structure,  
762 function, and dysfunction. *Neuron*, 82(1), 24-45.  
763 <https://doi.org/10.1016/j.neuron.2014.03.016>
- 764 Singh, A., Gebhart, M., Fritsch, R., Sinnegger-Brauns, M. J., Poggiani, C., Hoda, J. C., . . . Koschak,  
765 A. (2008). Modulation of voltage- and Ca<sup>2+</sup>-dependent gating of CaV1.3 L-type calcium  
766 channels by alternative splicing of a C-terminal regulatory domain. *J Biol Chem*, 283(30),  
767 20733-20744. <https://doi.org/10.1074/jbc.M802254200>
- 768 Stanika, R., Campiglio, M., Pinggera, A., Lee, A., Striessnig, J., Flucher, B. E., & Obermair, G. J.  
769 (2016). Splice variants of the Cav1.3 L-type calcium channel regulate dendritic spine  
770 morphology. *Sci Rep*, 6, 34528. <https://doi.org/10.1038/srep34528>
- 771 Stern, M. D. (1992). Buffering of calcium in the vicinity of a channel pore. *Cell Calcium*, 13(3),  
772 183-192. [https://doi.org/10.1016/0143-4160\(92\)90046-u](https://doi.org/10.1016/0143-4160(92)90046-u)
- 773 Striessnig, J., & Koschak, A. (2008). Exploring the function and pharmacotherapeutic potential  
774 of voltage-gated Ca<sup>2+</sup> channels with gene knockout models. *Channels (Austin)*, 2(4),  
775 233-251. <https://doi.org/10.4161/chan.2.4.5847>
- 776 Tadross, M. R., Tsien, R. W., & Yue, D. T. (2013). Ca<sup>2+</sup> channel nanodomains boost local Ca<sup>2+</sup>  
777 amplitude. *Proc Natl Acad Sci U S A*, 110(39), 15794-15799.  
778 <https://doi.org/10.1073/pnas.1313898110>
- 779 Tan, B. Z., Jiang, F., Tan, M. Y., Yu, D., Huang, H., Shen, Y., & Soong, T. W. (2011). Functional  
780 characterization of alternative splicing in the C terminus of L-type CaV1.3 channels. *J Biol*  
781 *Chem*, 286(49), 42725-42735. <https://doi.org/10.1074/jbc.M111.265207>

- 782 Verpelli, C., Dvoretzkova, E., Vicidomini, C., Rossi, F., Chiappalone, M., Schoen, M., . . . Sala, C.  
783 (2011). Importance of Shank3 protein in regulating metabotropic glutamate receptor 5  
784 (mGluR5) expression and signaling at synapses. *J Biol Chem*, 286(40), 34839-34850.  
785 <https://doi.org/10.1074/jbc.M111.258384>
- 786 Wang, X., Marks, C. R., Perfitt, T. L., Nakagawa, T., Lee, A., Jacobson, D. A., & Colbran, R. J.  
787 (2017). A novel mechanism for Ca<sup>2+</sup>/calmodulin-dependent protein kinase II targeting  
788 to L-type Ca<sup>2+</sup> channels that initiates longrange signaling to the nucleus. *J Biol Chem*,  
789 292(42), 17324-17336. <https://doi.org/10.1074/jbc.M117.788331>
- 790 Weick, J. P., Groth, R. D., Isaksen, A. L., & Mermelstein, P. G. (2003). Interactions with PDZ  
791 proteins are required for L-type calcium channels to activate cAMP response element-  
792 binding protein-dependent gene expression. *J Neurosci*, 23(8), 3446-3456.
- 793 Zhang, H., Fu, Y., Altier, C., Platzer, J., Surmeier, D. J., & Bezprozvanny, I. (2006). Ca<sub>v</sub>1.2 and  
794 Ca<sub>v</sub>1.3 neuronal L-type calcium channels: differential targeting and signaling to pCREB.  
795 *Eur J Neurosci*, 23(9), 2297-2310. <https://doi.org/10.1111/j.1460-9568.2006.04734.x>
- 796 Zhang, H., Maximov, A., Fu, Y., Xu, F., Tang, T. S., Tkatch, T., . . . Bezprozvanny, I. (2005).  
797 Association of Ca<sub>v</sub>1.3 L-type calcium channels with Shank. *J Neurosci*, 25(5), 1037-1049.  
798 <https://doi.org/10.1523/JNEUROSCI.4554-04.2005>
- 799 Zhang, J., Carver, C. M., Choveau, F. S., & Shapiro, M. S. (2016). Clustering and Functional  
800 Coupling of Diverse Ion Channels and Signaling Proteins Revealed by Super-resolution  
801 STORM Microscopy in Neurons. *Neuron*, 92(2), 461-478.  
802 <https://doi.org/10.1016/j.neuron.2016.09.014>
- 803 Zhou, Y., Kaiser, T., Monteiro, P., Zhang, X., Van der Goes, M. S., Wang, D., . . . Feng, G. (2016).  
804 Mice with Shank3 Mutations Associated with ASD and Schizophrenia Display Both  
805 Shared and Distinct Defects. *Neuron*, 89(1), 147-162.  
806 <https://doi.org/10.1016/j.neuron.2015.11.023>  
807

## Figures and Legends:

**Figure 1.** The Shank3 PDZ domain is necessary and sufficient for interaction with the CaV1.3 C-terminal domain. A) Schematic of Shank3 truncations and deletions expressed as GST fusion proteins for use in panel B, with amino acid residue numbers. The  $\Delta$ N-term deletion removed residues 543-564. B) An anti-HA immunoblot (top) of glutathione agarose co-sedimentation assays revealed that HA-Ca<sub>v</sub>1.3-CTD binds to all GST-Shank3 proteins containing the PDZ domain but not to proteins lacking the PDZ domain. Full-length GST fusion proteins are marked with asterisks on the corresponding GST immunoblot (bottom). C) Domain structure of full-length Shank3 and six GST-Shank3 fusion proteins spanning the entire Shank3 protein used in panel D. Canonical Shank3 domains are depicted as gray boxes: ANK = ankyrin-rich repeats, aa 1-324; SH3 = Src homology 3 domain, aa 325-536; PDZ = PSD95/Dlg1/zo-1 domain, aa 537-828; CK2BD = CaMKII binding domain, aa 829-1130; PRR = proline-rich region, aa 1131-1467; SAM = Sterile alpha motif, aa 1468-1740. D) An anti-HA immunoblot (top) of a glutathione agarose co-sedimentation assay detected binding of full-length HA-Ca<sub>v</sub>1.3  $\alpha$  subunit only to the GST-Shank3-PDZ domain protein. Full-length GST fusion proteins are marked with color coded asterisks on the corresponding GST immunoblot (bottom). Panels B and D are representative of three independent biological replicates.

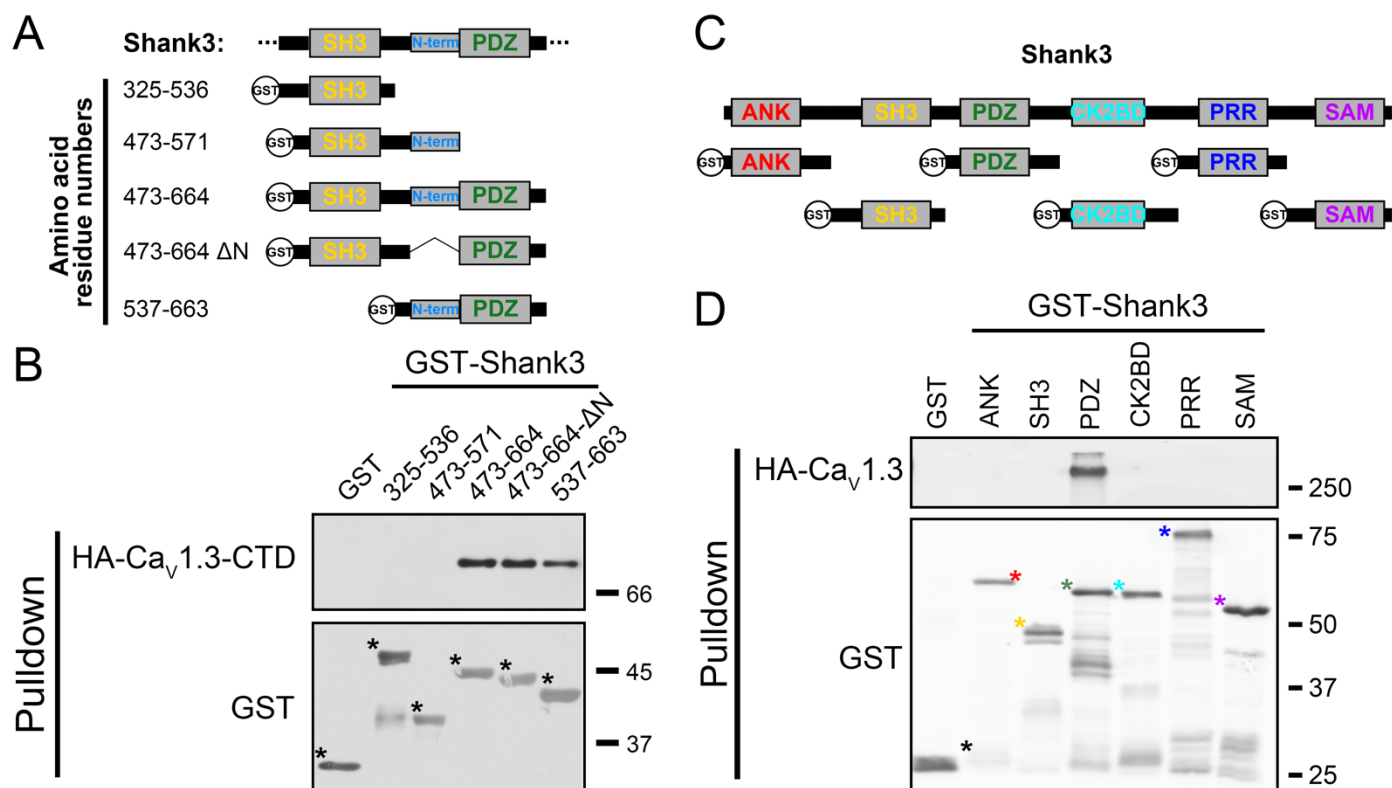

**Figure 2. Association of GFP-Shank3 with HA-Cav1.3 is facilitated by co-expression of Flag- $\beta$  subunits.** A) Representative immunoblots of HA, Shank3, FLAG, and GFP signals in the input (top) and anti-HA immune complexes (bottom) isolated from soluble fractions of HEK293T cells co-expressing HA-Cav1.3 with GFP or GFP-Shank3, with or without FLAG- $\beta$ 2a or - $\beta$ 3 subunits, as indicated below. Quantifications of the Shank3 (B) and HA-Cav1.3 (C) signals in HA-IPs: mean  $\pm$  SEM, n = 7 independent transfections. B: One-way ANOVA followed by Tukey's post hoc test. C: Two-way ANOVA followed by Sidak's post hoc test when comparing GFP to GFP-Shank3 or by Turkey's post hoc test when comparing between no  $\beta$ ,  $\beta$ 3, and  $\beta$ 2a. D) Representative immunoblots of HA, FLAG, and GST signals in soluble fractions of HEK293T cells co-expressing HA-Cav1.3,  $\alpha$ 2 $\delta$ , with or without Flag- $\beta$ 2a or - $\beta$ 3 subunits (input) and in glutathione agarose co-sedimentation assays following incubation with the GST-Shank3-PDZ domain (2  $\mu$ g). E) Quantification of HA-Cav1.3 signals in GST complexes obtained from 5 independent transfected cell samples incubated with two different GST-Shank3-PDZ domain constructs containing either residues 537-828 (as in Fig. 1D: 1 replicate, magenta symbols) or residues 572-691 (4 replicates, gray symbols). Mean  $\pm$  SEM, n = 5. No significant differences between groups by one-way ANOVA.

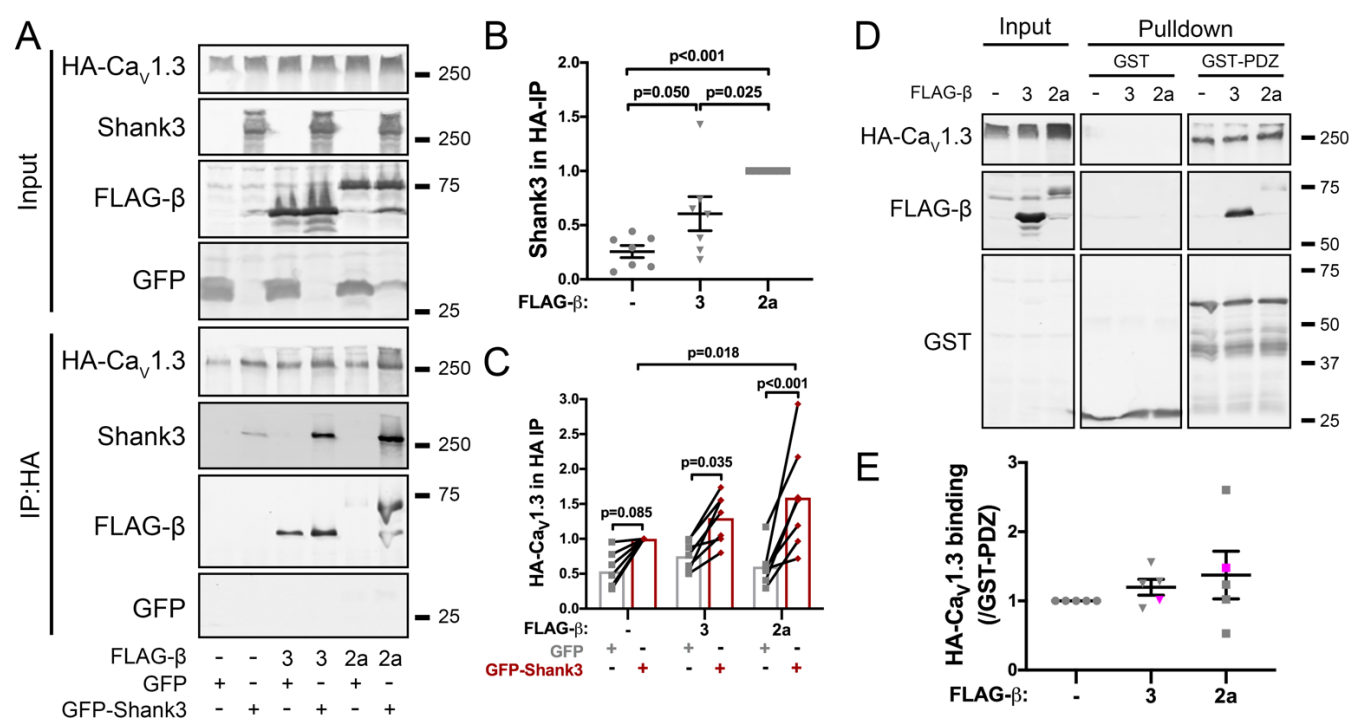

**Figure 3. Association of Flag- $\beta$  subunits with GFP-Shank3.** A) Representative Shank3, Flag and GFP immunoblots of soluble fractions (Input) of HEK293T cells co-expressing GFP (control) or GFP-Shank3 (WT or  $\Delta$ PDZ) with or without FLAG- $\beta$ 3 or - $\beta$ 2a subunits, and corresponding isolated anti-GFP immune complexes. B) Quantification of FLAG- $\beta$  subunit signals in GFP-Shank3 immune complexes from 3 independent transfected cell replicates. Mean  $\pm$  SEM: two-way ANOVA followed by Sidak's post hoc test. C) Representative Shank3 and Flag immunoblots of inputs and anti-FLAG immune complexes isolated from HEK293T cells expressing GFP-Shank3 (WT or  $\Delta$ PDZ) with or without FLAG- $\beta$ 3 or  $\beta$ 2a. D) Quantification of GFP-Shank3 signals in FLAG- $\beta$  immune complexes from 4 independent transfected cell replicates. Mean  $\pm$  SEM: two-way ANOVA followed by Sidak's post hoc test.

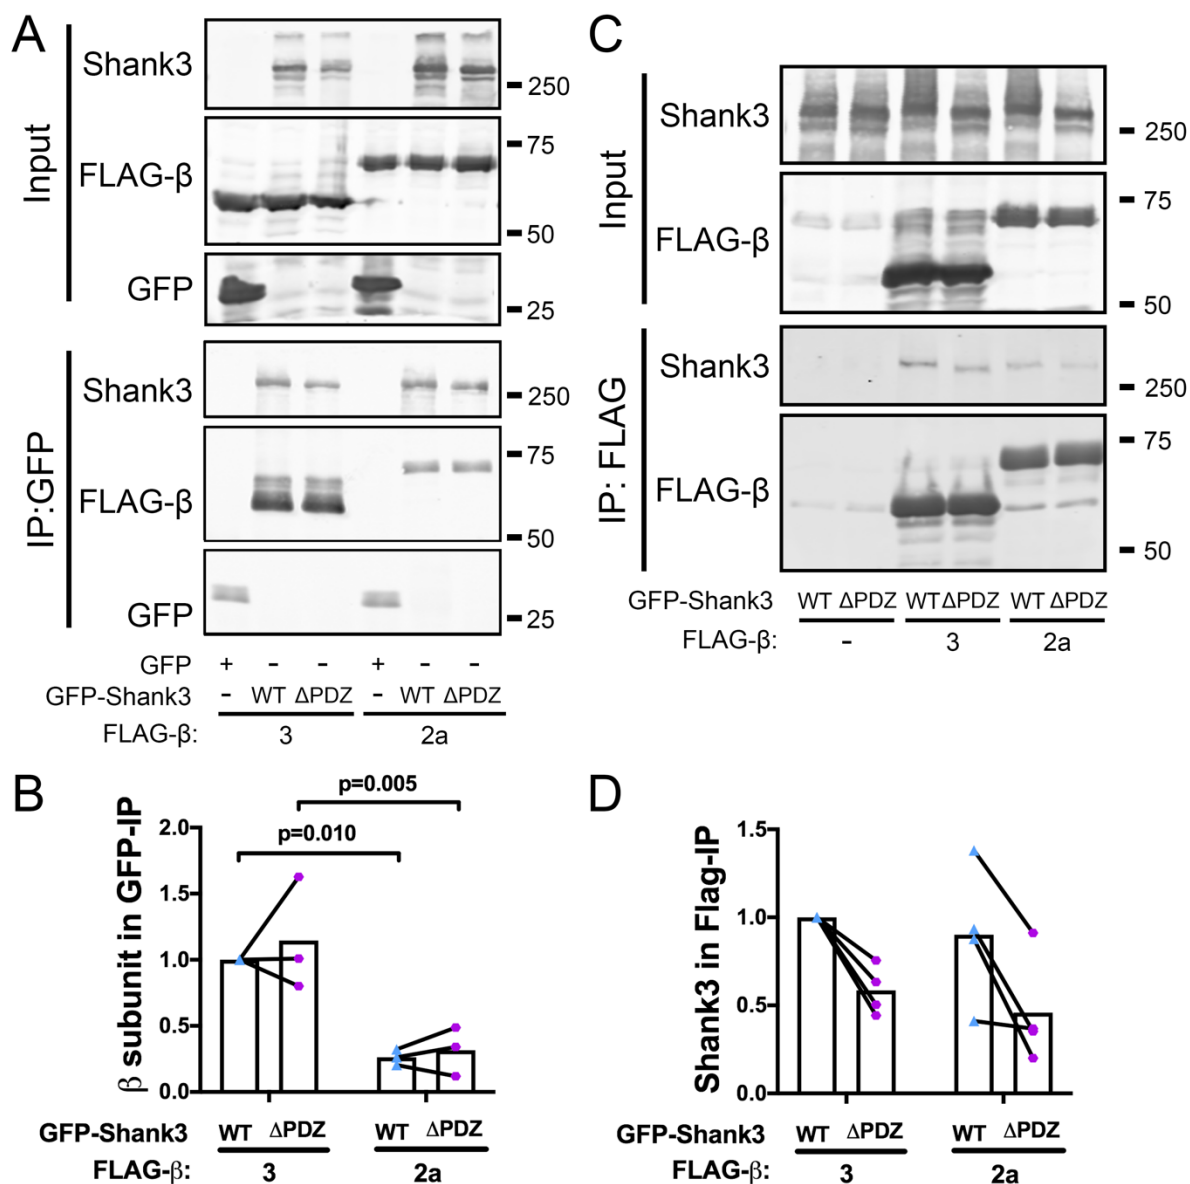



**Figure 4.** Assembly of multi-Cav1.3 LTCC complexes requires the Shank3 PDZ domain. A) Schematic of experimental design to test the hypothesis that Shank3 mediates the assembly of complexes containing multiple Cav1.3  $\alpha 1$  subunits. In the presence of GFP (left), mCherry-Cav1.3 cannot associate with anti-HA IPs. PDZ domains in GFP-Shank3 dimers associate with both HA- and mCherry-Cav1.3, mediating the isolation of both GFP-Shank3 and mCherry-Cav1.3 by anti-HA IP (right). B) Representative immunoblots for HA- and mCherry-Cav1.3, FLAG- $\beta 2a$ , Shank3 and GFP in the inputs and anti-HA immunoprecipitations (IPs) from soluble fractions of HEK293T cells co-expressing HA- and mCherry-tagged Cav1.3 and FLAG- $\beta 2a$  with either GFP or GFP-Shank3 (WT or  $\Delta$ PDZ). C) Quantification of GFP/GFP-Shank3 (WT or  $\Delta$ PDZ) signals in HA-IPs, normalized to HA-Cav1.3 signal, from three independent transfections. D) Quantification of mCherry-Cav1.3 signals in HA-IPs, normalized to HA-Cav1.3 signal, from three independent transfections. Mean  $\pm$  SEM: One-way ANOVA followed by Tukey's post hoc test.

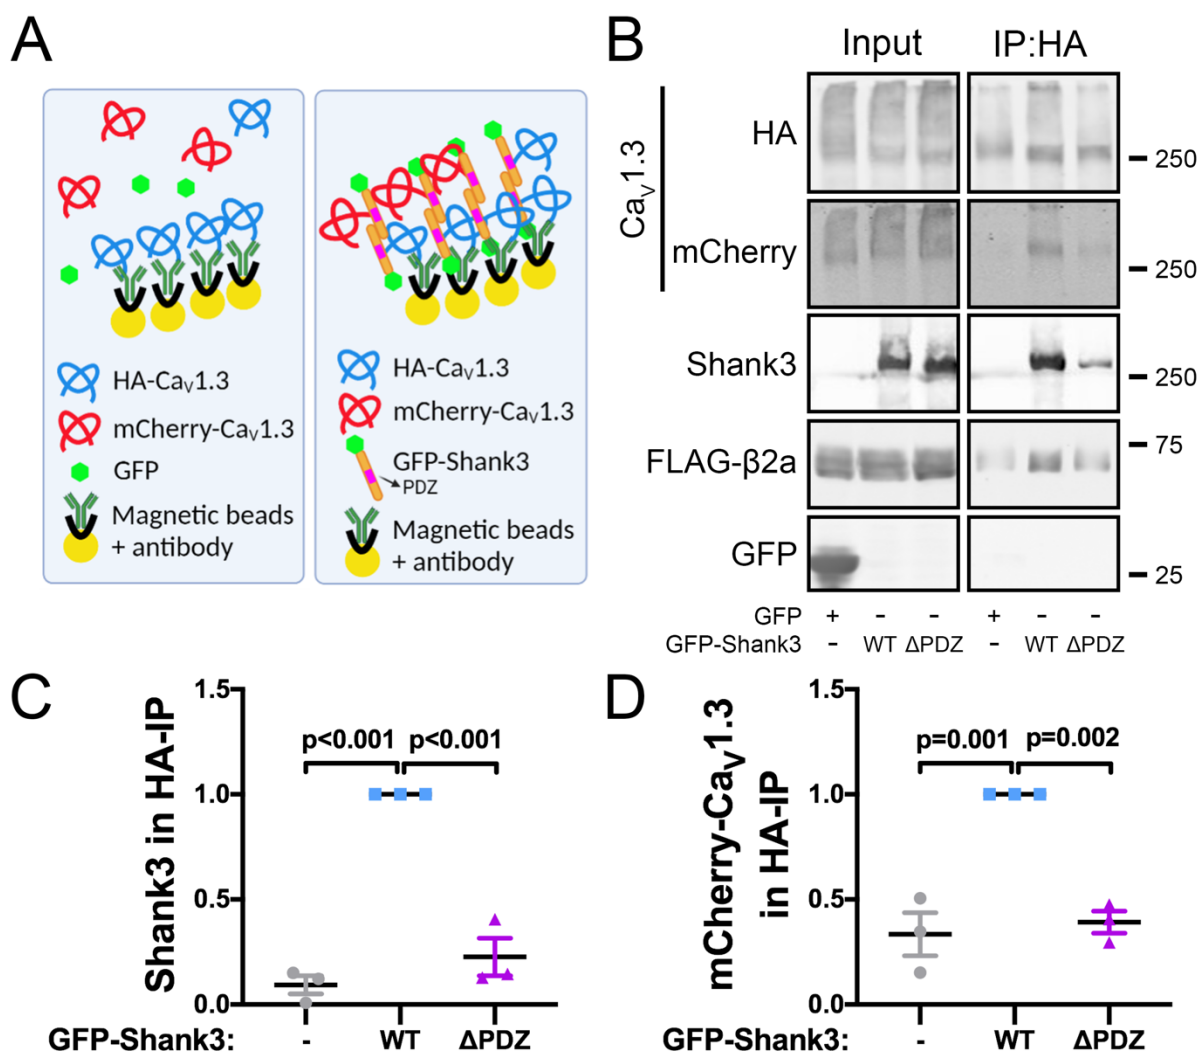

**Figure 5.** Assembly of multi-Cav1.3 LTCC complexes by Shank3 is suppressed by Ca<sup>2+</sup>/CaM. A) Representative immunoblots for HA- and mCherry-Cav1.3, and GFP in inputs and anti-HA immunoprecipitations (IPs) from soluble fractions of HEK293T cells co-expressing HA- and mCherry-tagged Cav1.3 and FLAG-β2a with either GFP or GFP-Shank3 without (EDTA) or with Ca<sup>2+</sup>/CaM addition. B) Quantification of GFP-Shank3 in HA-IPs from six independent transfections normalized to the EDTA control; analyzed using a one-sample t-test. C) Quantification of mCherry-Cav1.3 in HA-IPs from six independent transfections normalized to the EDTA/GFP-Shank3 control; analyzed using a two-way ANOVA followed by Sidak's post hoc test.

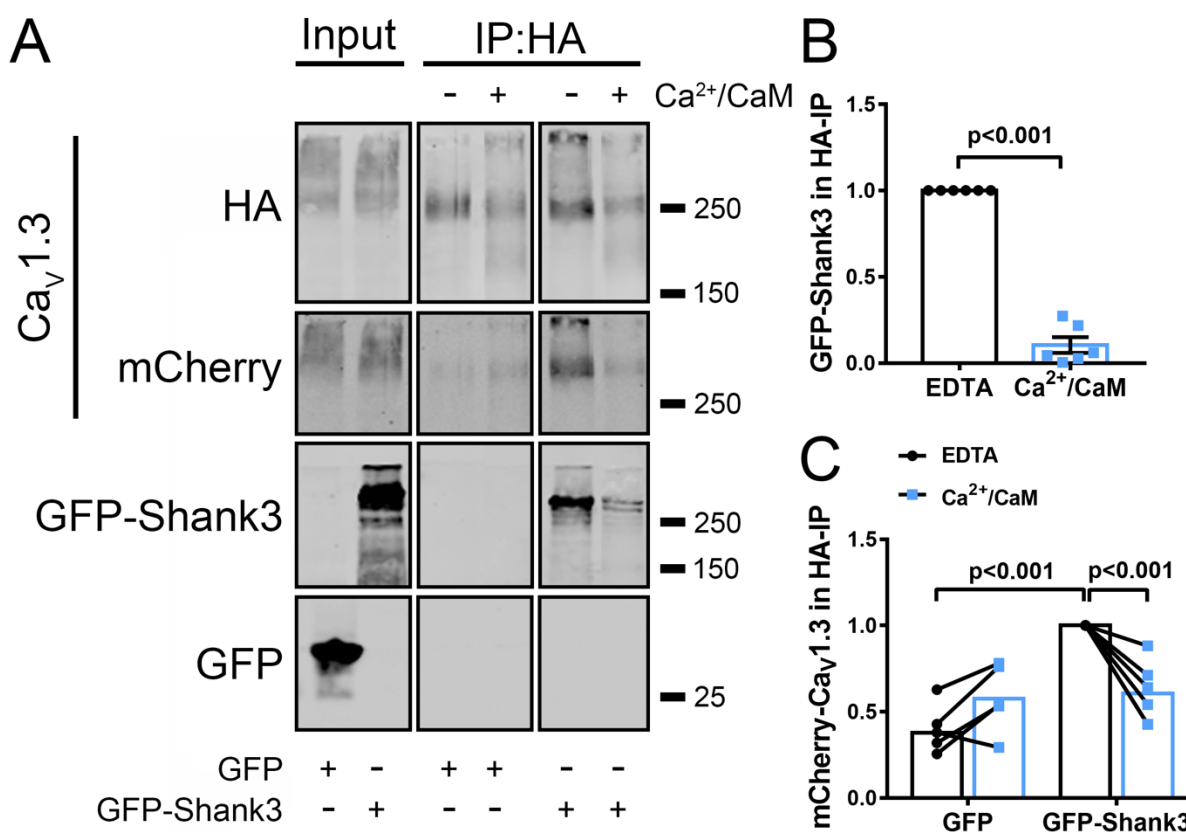

**Figure 6.** GFP-Shank3 modulates mCherry-Cav1.3 dynamics in HEK293 cell plasma membranes. TIRF microscope imaging of live HEK293 cells co-expressing mCherry-Cav1.3. A) Representative single channel and merged TIRF microscope images of live HEK293 cells expressing mCherry-Cav1.3, FLAG- $\beta$ 3 and either GFP (top) or GFP-Shank3 (bottom). Enlarged time lapse mCherry images within the indicated rectangular regions of interest are shown in Ai and Aii (Supplemental Movies 1 and 2 show the entire time course). Colored arrows indicate the properties of selected mCherry puncta: Green, puncta present throughout; Red, puncta that disappear; Orange, puncta that appear transiently; Blue, puncta that appear but remain to the last time point. Scale bars, 5  $\mu$ m in A and 2  $\mu$ m in Ai and Aii. B) Tracking lateral movement of individual Cav1.3 puncta in the plane of the TIRF image using the FIJI TrackMate plug-in, superimposed on images from the last time point in Ai and Aii. C) Quantification of the average intensity of mCherry-Cav1.3 puncta. D) Quantification of the speed of lateral movement of mCherry-Cav1.3 puncta (TrackMate). Data in panels C and D were collected from 16 (GFP) or 9 (GFP-Shank3) cells from 5 independent transfections. Open and solid symbols are from cells transfected with FLAG- $\beta$ 2a or FLAG- $\beta$ 3, respectively. Mean  $\pm$  SEM: unpaired t-test.

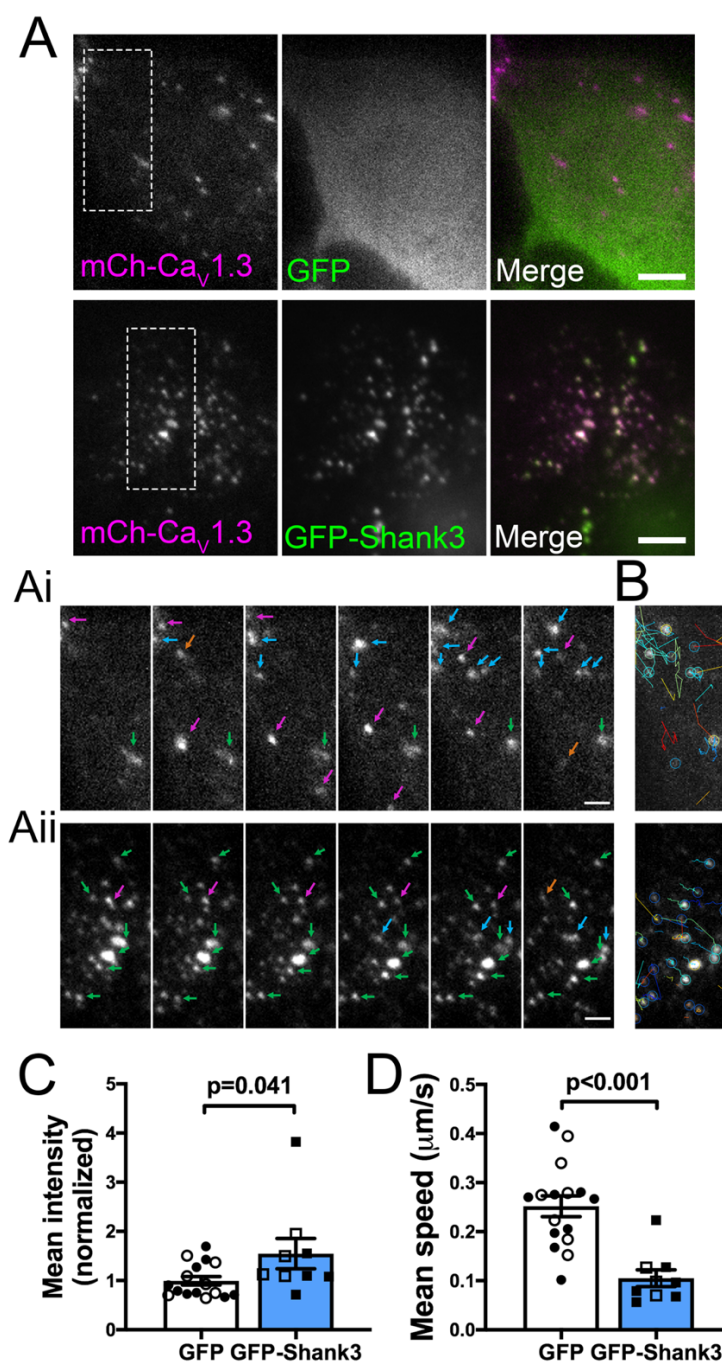

**Figure 7.**  $\text{Ca}^{2+}$  influx dissociates GFP-Shank3 from mCherry-Cav1.3 in live HEK293 cells. A) Representative mCherry, GFP and merged TIRF microscope image of a live HEK293 cell co-expressing mCherry-Cav1.3, FLAG- $\beta$ 3 and GFP-Shank3 at the start of the experiment (scale bar, 5  $\mu\text{m}$ ). B) The cell was imaged every 5 s for 2-3 minutes each in “no  $\text{Ca}^{2+}$ ” buffer, following the addition of BayK 8644 (10  $\mu\text{M}$ ), and following the further addition of  $\text{Ca}^{2+}$  (2.5 mM  $\text{CaCl}_2$ ). No images were collected for  $\sim 1$  min during each buffer addition. The ratio of mCherry-Cav1.3 to GFP-Shank3 signal intensity in the region of interest (highlighted in panel A) was quantified at each time point. Insets show enlarged ROI images of mCherry-Cav1.3 (top row) and GFP-Shank3 (bottom row) images at selected time points (scale bar, 2  $\mu\text{m}$ ). Supplemental Movie 3 shows all time points. C) Summary of average mCherry-Cav1.3 signal intensity from all time points under each condition, normalized to the “no  $\text{Ca}^{2+}$ ” condition. D) Ratio of mCherry-Cav1.3 to GFP-Shank3 signal intensity from all time points under each condition, normalized to the “no  $\text{Ca}^{2+}$ ” condition. Data in panels C and D were collected from 12 cells analyzed from six transfections (open and solid symbols indicate expressing FLAG- $\beta$ 2a or FLAG- $\beta$ 3, respectively). One-way ANOVA followed by Tukey’s post hoc test was used for comparisons.

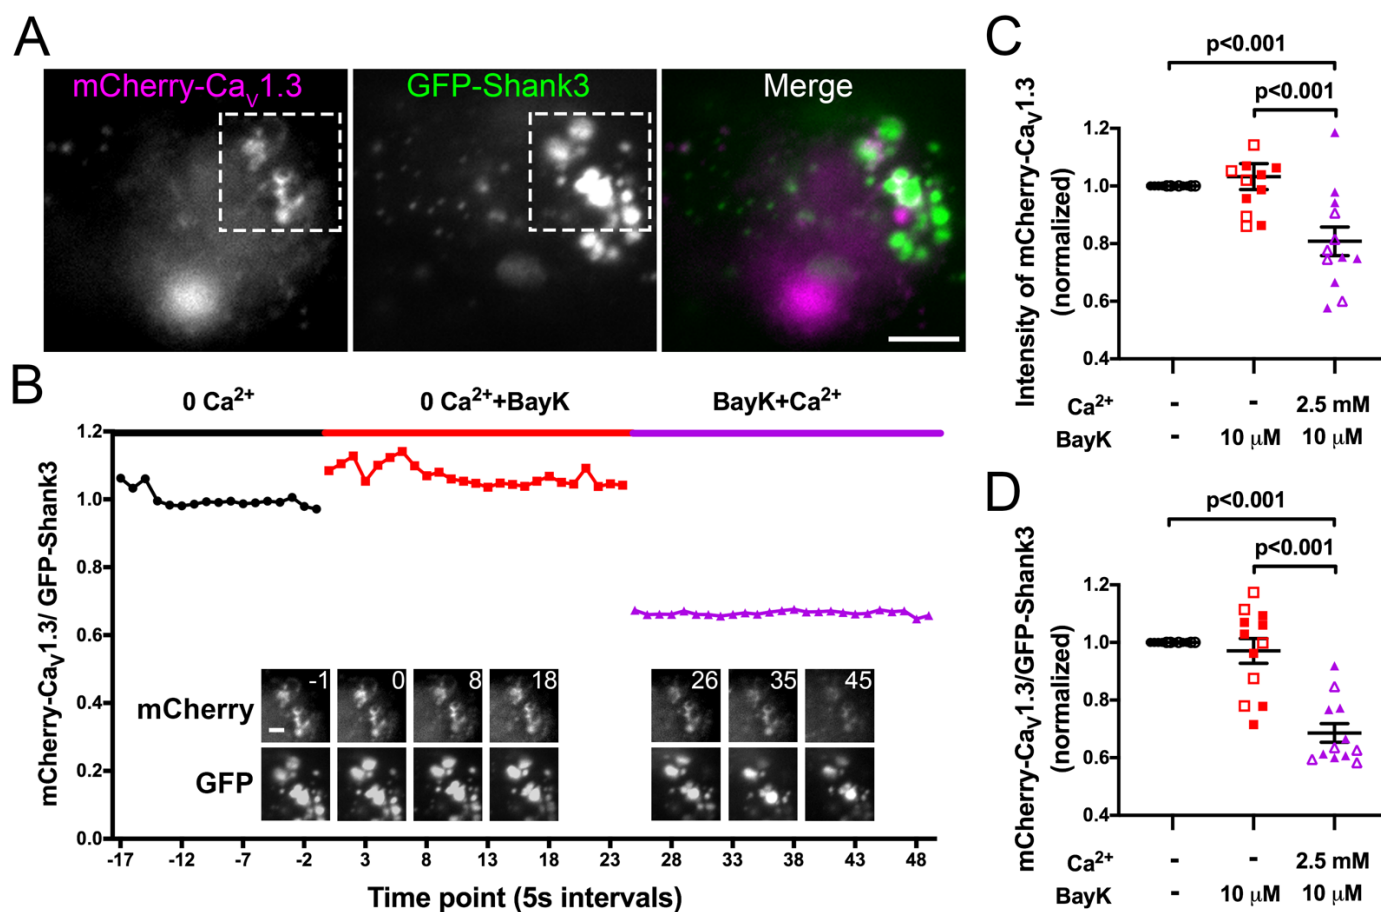

**Figure 8.** Shank3 and Ca<sup>2+</sup> influx regulate mCherry-Cav1.3 puncta intensity in HEK293 cell plasma membranes.

A) Representative TIRF microscope images of single HEK293 cells co-expressing mCherry-Cav1.3 and FLAG- $\beta$ 3 with either GFP or GFP-Shank3 (WT or  $\Delta$ PDZ), fixed following incubation for 10-15 min in “no Ca<sup>2+</sup>” or Ca<sup>2+</sup> buffer with vehicle (DMSO) or BayK 8644 (BayK, 10  $\mu$ M), as indicated (scale bar, 5  $\mu$ m). B) Quantification of mCherry-Cav1.3 puncta intensity. C) Quantification of mCherry-Cav1.3 puncta density. D) Intensity correlation analysis of GFP/mCherry colocalization. Panels B-D plot the mean  $\pm$  SEM, with each data point representing the average of 7-15 cells per condition from 3 or 4 independent transfections. Data were compared using a two-way ANOVA followed by Tukey’s multiple comparisons test.

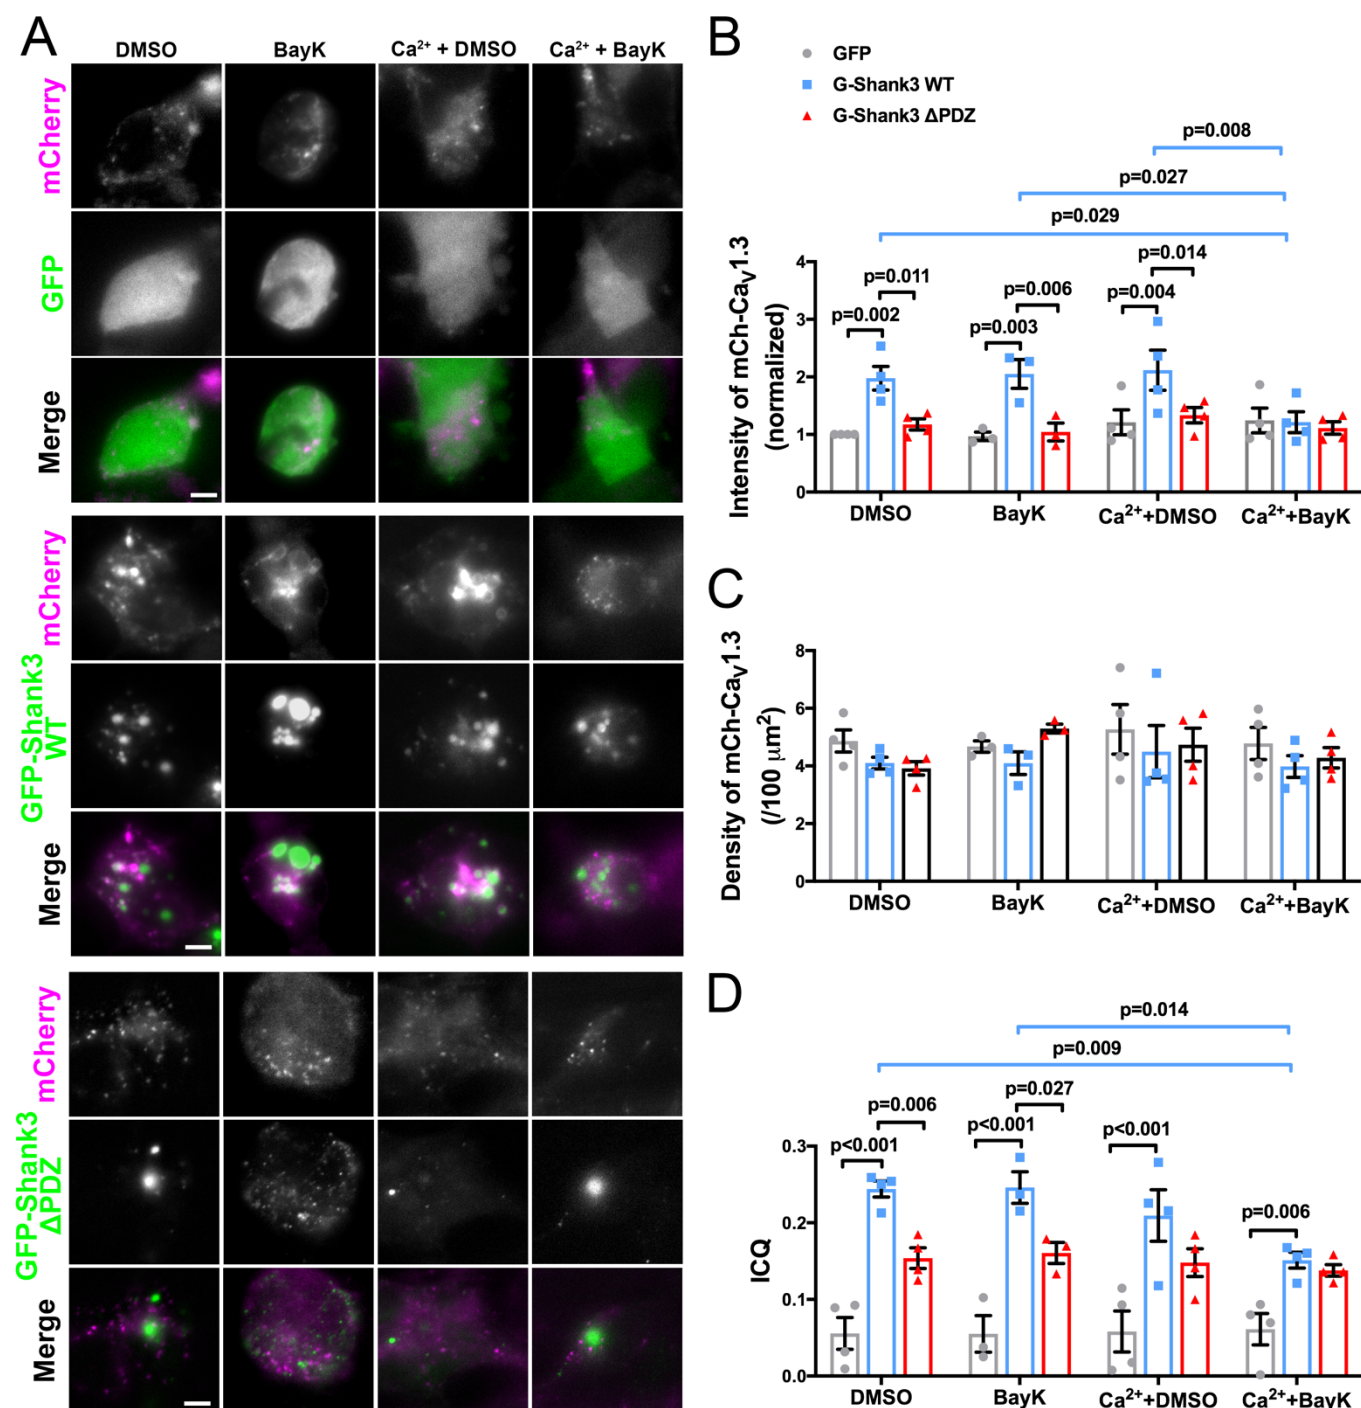

**Figure 9.** Effects of Shank3 knock-down on surface-expressed Cav1.3 puncta in neurons. Primary rat hippocampal neurons (14 DIV) expressing sHA-Cav1.3 and FLAG- $\beta$ 3 with either GFP-nonsense shRNA (GFP-nssh) or GFP-Shank3 shRNA (GFP-Shank3-sh) were live-immunostained for the HA tag at DIV21, fixed, permeabilized and then immunostained for endogenous Shank3 and DAPI. Neurons were imaged using Airyscan super-resolution confocal microscopy. A) Representative images of soma and dendrites. Scale bar, 5  $\mu$ m. B) and C) Quantification of sHA-Cav1.3 cluster intensity and cluster density, respectively, of n = 37 (GFP-nssh) or 35 (GFP-Shank3-sh) neurons from three independent cultures/transfections; comparisons made using an unpaired t-test.

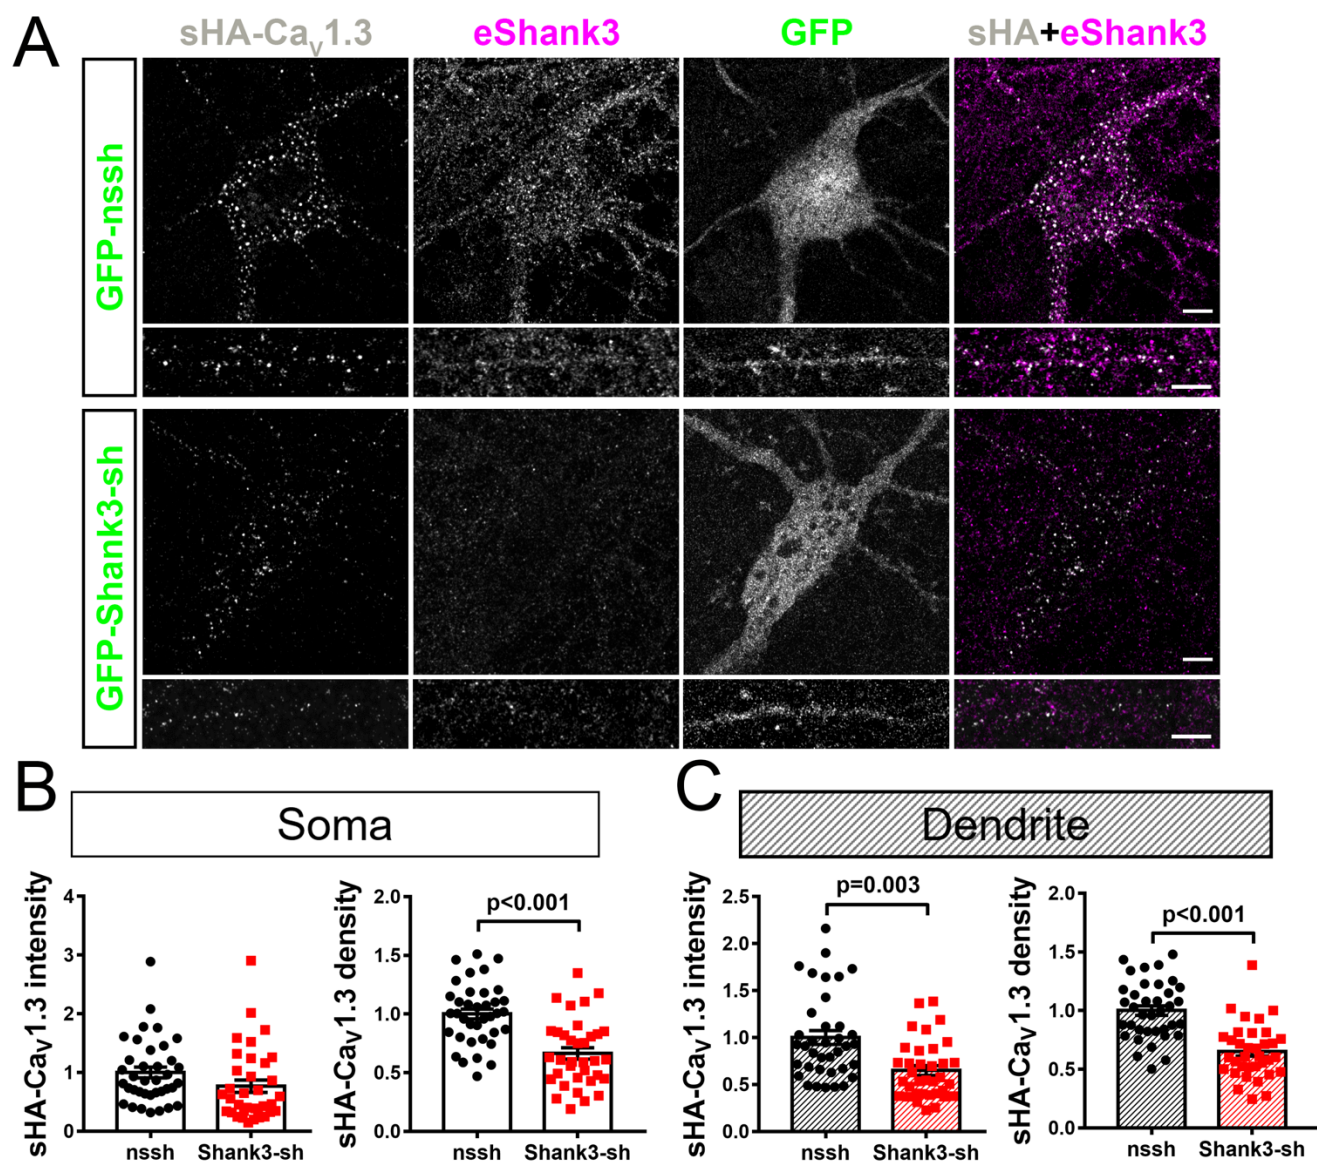

**Figure 10.** Shank3 knock-down has no effect on Cav1.2 surface puncta intensity in neurons. Primary rat hippocampal neuron (14 DIV) expressing sHA-Cav1.2 and FLAG- $\beta$ 3 with either GFP-nonsense shRNA (GFP-nssh) or GFP-Shank3 shRNA (GFP-Shank3-sh) were live-immunostained for the HA tag at DIV21, fixed, permeabilized and then immunostained for endogenous Shank3 and DAPI. Neurons were imaged using Airyscan super-resolution confocal microscopy. A) Representative images of soma and dendrites. Scale bar, 5  $\mu$ m. B) and C) Quantification of sHA-Cav1.2 cluster intensity and cluster density from n = 26 (GFP-nssh) or 22 (GFP-Shank3-sh) neurons from three independent cultures/transfections; comparisons made using an unpaired t-test.

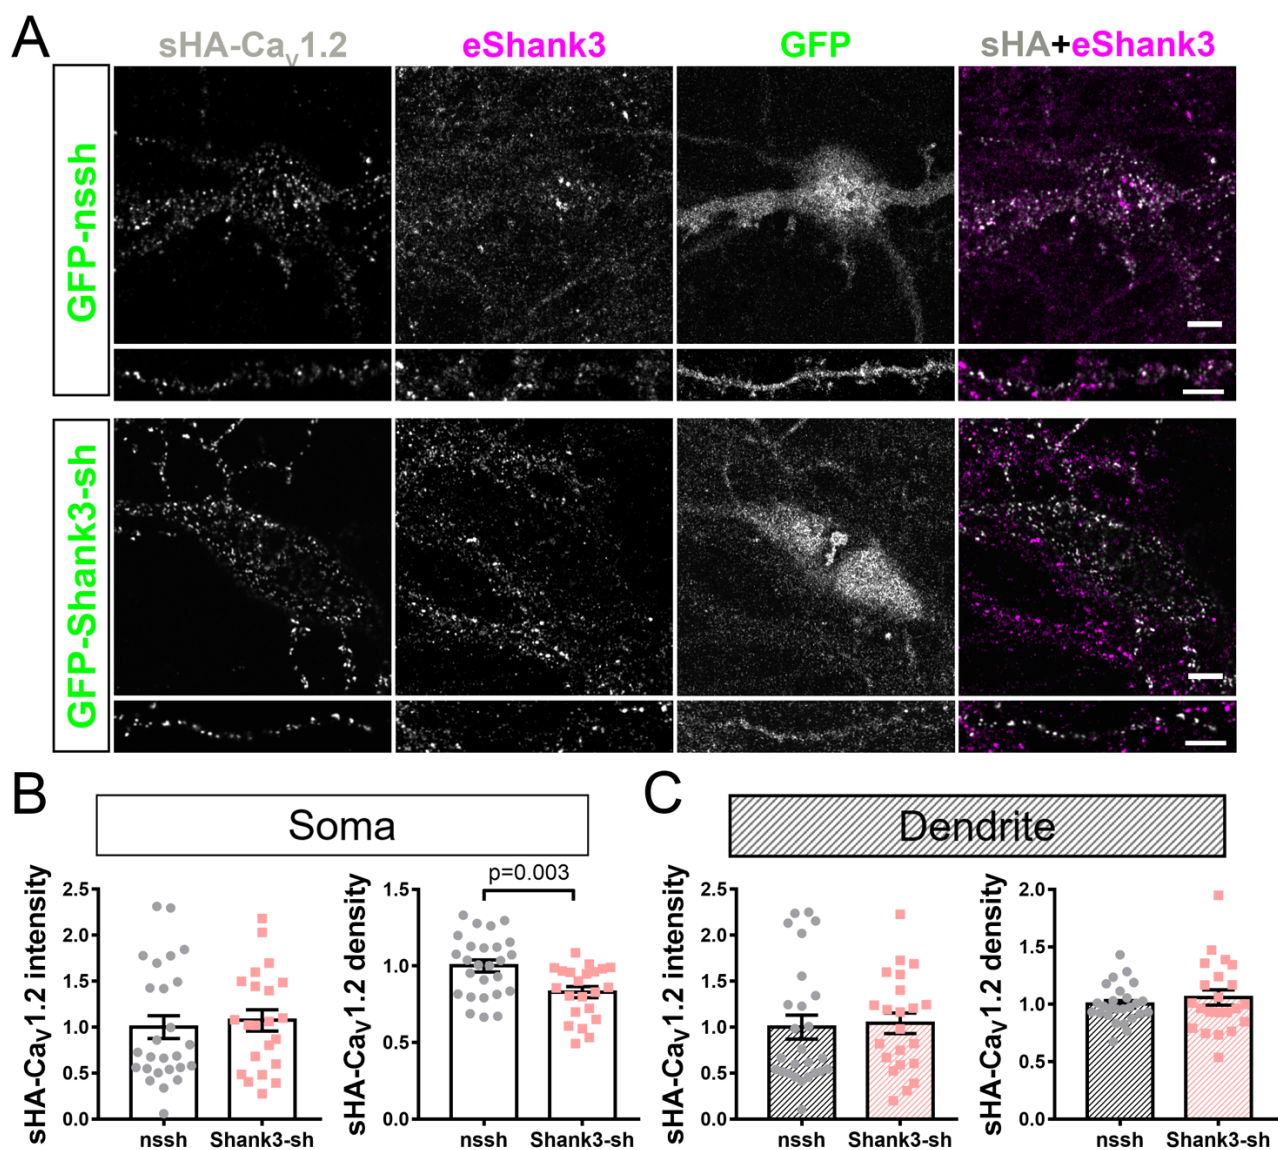

## Clustering of Ca<sub>v</sub>1.3 L-type calcium channels by Shank3

Qian Yang<sup>1</sup>, Tyler L. Perfitt<sup>1,5</sup>, Juliana Quay<sup>2</sup>, Lan Hu<sup>1</sup>, Roger J. Colbran<sup>1,3,4</sup>

<sup>1</sup>Department of Molecular Physiology and Biophysics

<sup>2</sup>Chemical and Physical Biology

<sup>3</sup>Vanderbilt Brain Institute

<sup>4</sup>Vanderbilt-Kennedy Center for Research on Human Development,  
Vanderbilt University School of Medicine, Nashville, TN, USA 37232-0615

<sup>5</sup>Current address: Rare Disease Research Unit, Pfizer Inc

Address correspondence to: Roger J. Colbran; Rm. 702 Light Hall, Vanderbilt University  
School of Medicine, Nashville, TN 37232-0615 (Tel: 615-936-1630. Fax: 615-322-7236. Email:  
[roger.colbran@vanderbilt.edu](mailto:roger.colbran@vanderbilt.edu))

ORCID IDs: Qian Yang, [0000-0001-9861-2790](https://orcid.org/0000-0001-9861-2790); Tyler L. Perfitt, [0000-0002-2381-3341](https://orcid.org/0000-0002-2381-3341); Juliana  
Quay, [0000-0002-9100-6074](https://orcid.org/0000-0002-9100-6074); Roger J. Colbran, [0000-0001-7401-8244](https://orcid.org/0000-0001-7401-8244).

## Supplemental Figures and Legends



**Supplemental Figure 1** (related to Figure 3). No detectable interaction of FLAG- $\beta$ 3 or - $\beta$ 2a with any GST-Shank3 fusion proteins. Soluble fractions of HEK293T cells expressing either FLAG- $\beta$ 3 (top) or - $\beta$ 2a (bottom) (Input) were incubated with GST or the indicated GST-Shank3 domain constructs (see Fig. 1C). Complexes were isolated using glutathione magnetic beads and then aliquots of the input and complexes were immunoblotted for the FLAG epitope or GST. Representative of three replicates with different transfected cell lysates.

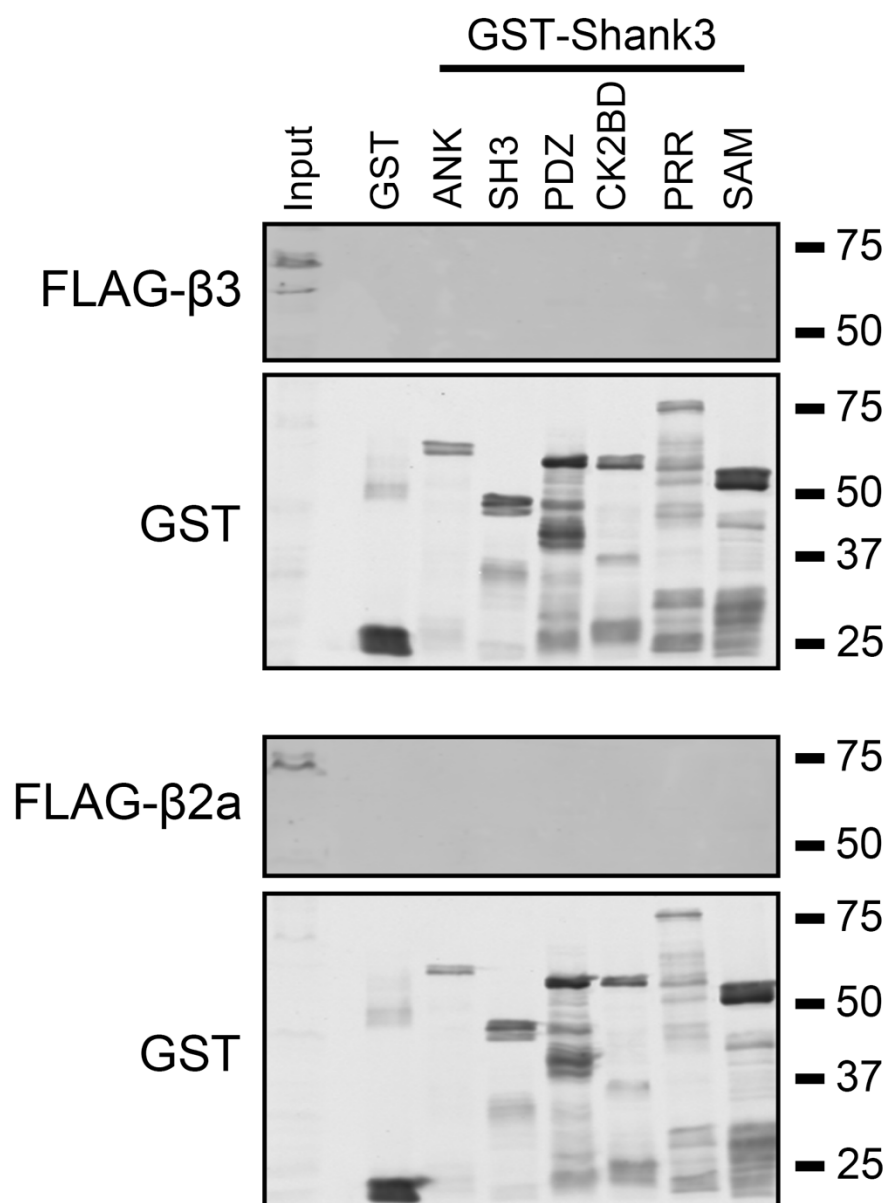

**Supplemental Figure 2** (related to Figure 7). Ca<sup>2+</sup> influx dissociates GFP-Shank3 from mCherry-Ca<sub>v</sub>1.3 in live HEK293 cells expressed FLAG-β2a. Data were collected in parallel with those shown in Figure 7, except that FLAG-β2a was co-expressed instead of FLAG-β3. The same cell incubation and imaging conditions were used. A) Representative mCherry, GFP and merged image of a HEK293 cell at the start of the experiment (scale bar, 5 μm). B) Quantification of the ratio of mCherry-Ca<sub>v</sub>1.3 to GFP-Shank3 signal intensity by time in the region of interest highlighted in panel A, with insets showing enlarged mCherry-Ca<sub>v</sub>1.3 (top row) and GFP-Shank3 (bottom row) images at selected time points (scale bar, 2 μm). Supplemental Movie 4 shows all time points. Summary quantitative data from all cells expressing FLAG-β2a are included in Figure 7C and 7D.

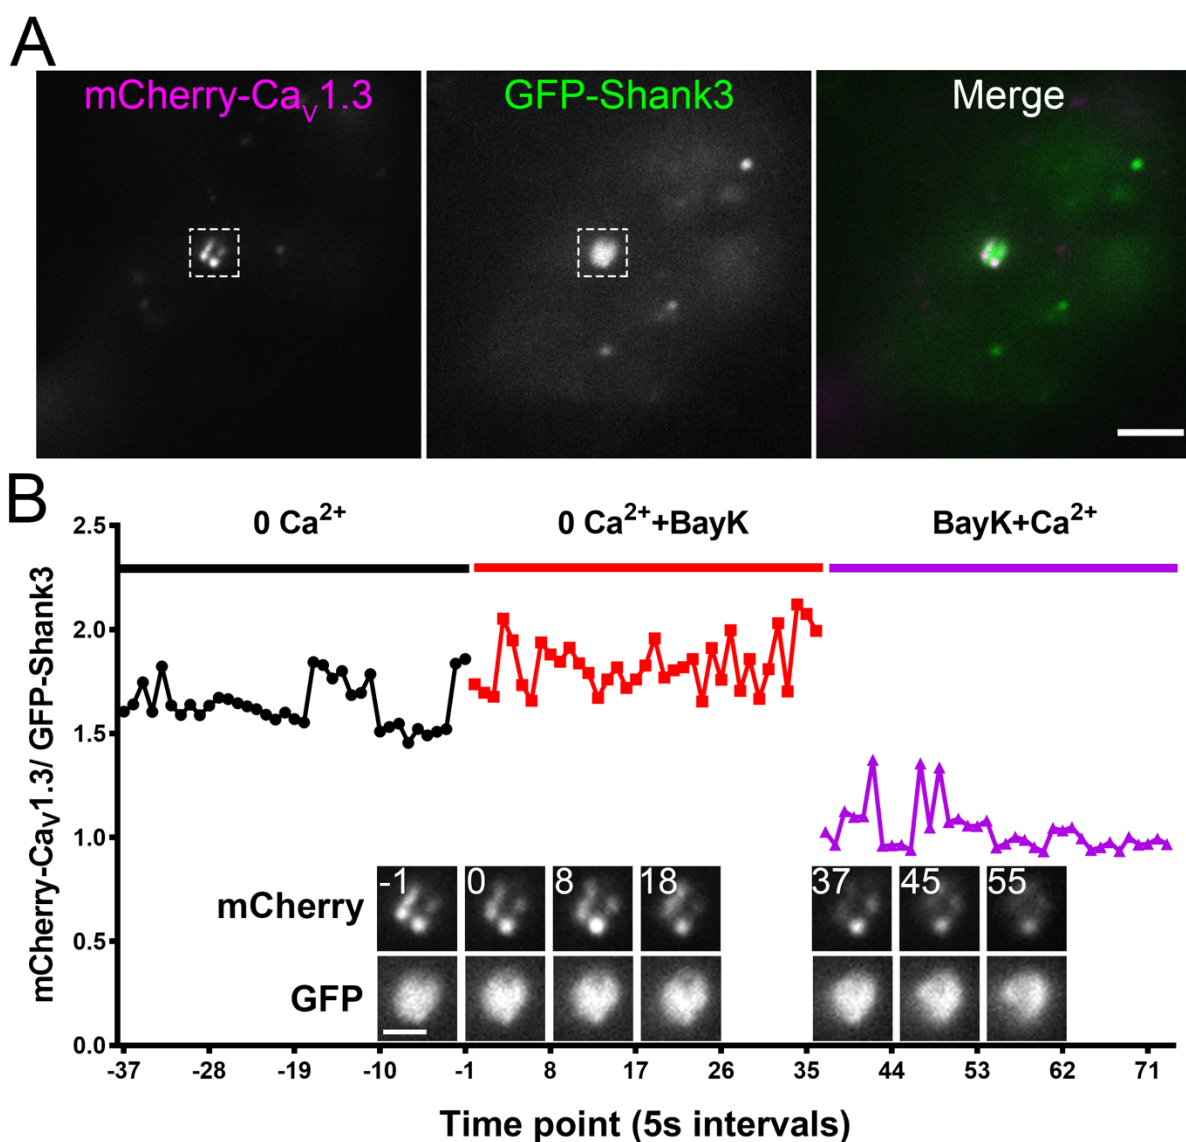

**Supplemental Figure 3** (related to Figure 9). Validation of Shank3 shRNAs in cultured hippocampal neurons. Primary rat hippocampal neuron cultures (14 DIV) were transfected to express sHA-Cav1.3, FLAG- $\beta$ 3 (top panels) or FLAG- $\beta$ 2a (bottom panels), and either GFP-nonsense shRNA (GFP-nssh) or GFP-Shank3 shRNA (GFP-Shank3-sh). Neurons were fixed at DIV21, permeabilized and then immunostained for endogenous Shank3. A series of GFP, DAPI and eShank3 images were collected at different optical planes using a confocal microscope. A) Representative maximum intensity projection of the Z-stack merged using FIJI. White dashed lines were used to outline GFP expression in soma. Scale bar, 10  $\mu$ m. B) Quantification of total Shank3 staining intensity in the soma of cells expressing FLAG- $\beta$ 3 (left) or FLAG- $\beta$ 2a (right), normalized to Shank3 staining in nearby non-transfected cell somas on the same coverslips. Data collected from 3 independent transfections for each condition.  $\beta$ 3: n = 16 and 21 neurons for GFP-nssh, and GFP-Shank3-sh, respectively.  $\beta$ 2a: n = 23 and 24 neurons for GFP-nssh and GFP-Shank3-sh, respectively. Comparisons made using an unpaired t-test.

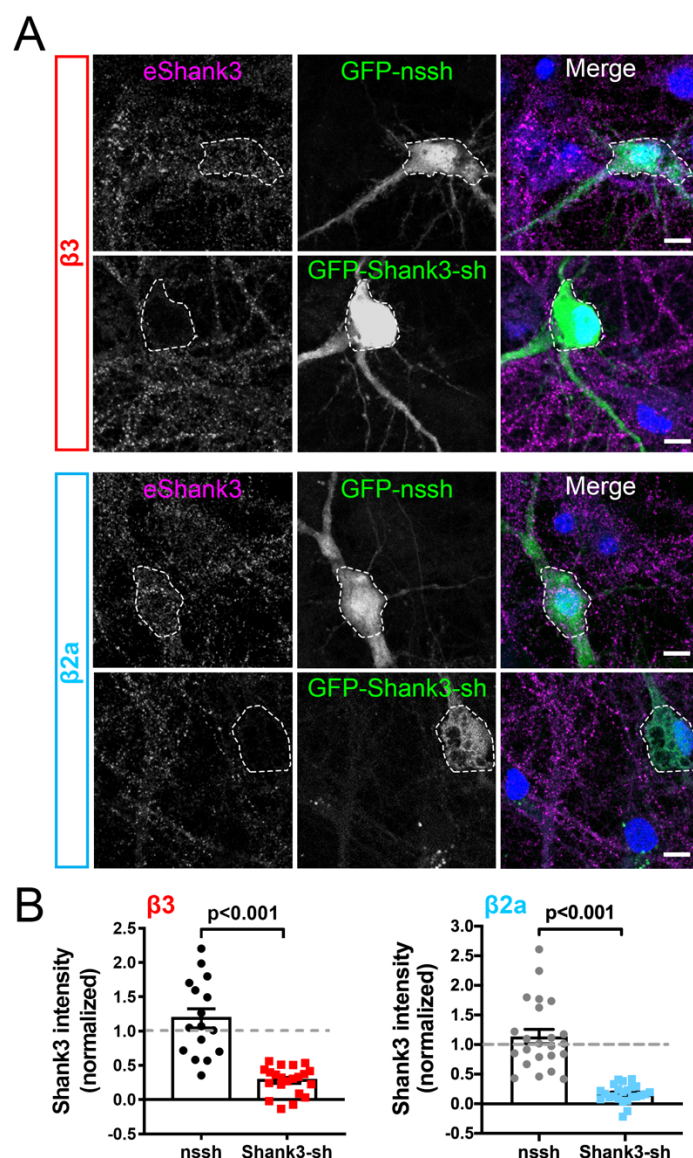

**Supplemental Figure 4** (related to Figure 9). Quantification of surface localized sHA-Cav1.3 cluster density and intensity on soma or dendrites in neurons co-expressing FLAG- $\beta$ 3. Data from Figure 9 were replotted by averaging the cluster intensity or density within each independent replicate and normalizing to values in cells expressing GFP-nssh ( $n=3$  cultures/transfections, 9-16 cells per transfection). Comparisons made using a one-sample t-test.

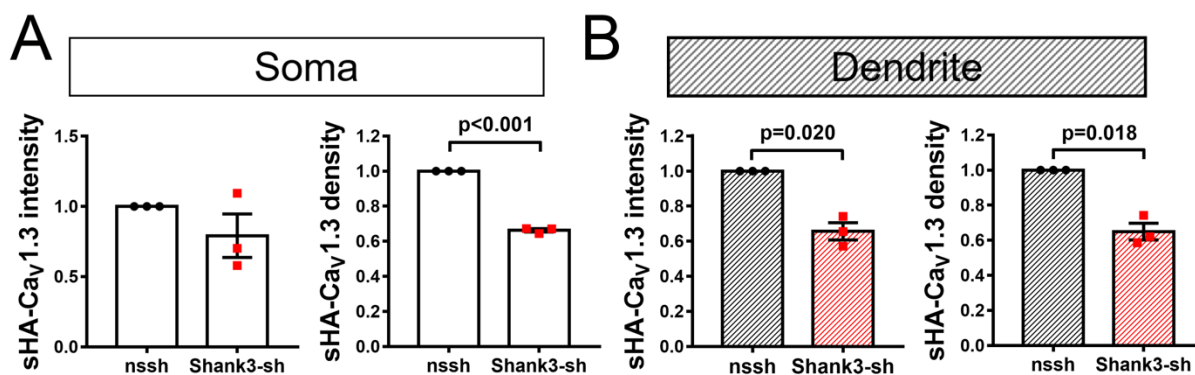

**Supplemental Figure 5** (related to Figure 9). Effects of Shank3 knock-down on surface-expressed Cav1.3 puncta in neurons expressing FLAG- $\beta$ 2a. These experiments were conducted in parallel with those shown in Fig. 9, except that FLAG- $\beta$ 2a was co-expressed instead of FLAG- $\beta$ 3. A) Representative images of soma and dendrites. Scale bar, 5  $\mu$ m. B) and C) Quantification of sHA-Cav<sub>v</sub>1.3 cluster intensity and cluster density from n = 55 (GFP-nssh) or 36 (GFP-Shank3-sh) neurons from five independent cultures/transfections; comparisons made using an unpaired t-test. B') and C') Re-plot of the same data after averaging the cluster intensity or density within each independent replicate and normalizing to values in cells expressing the control shRNA (n=5). Comparisons made using a one-sample t-test.

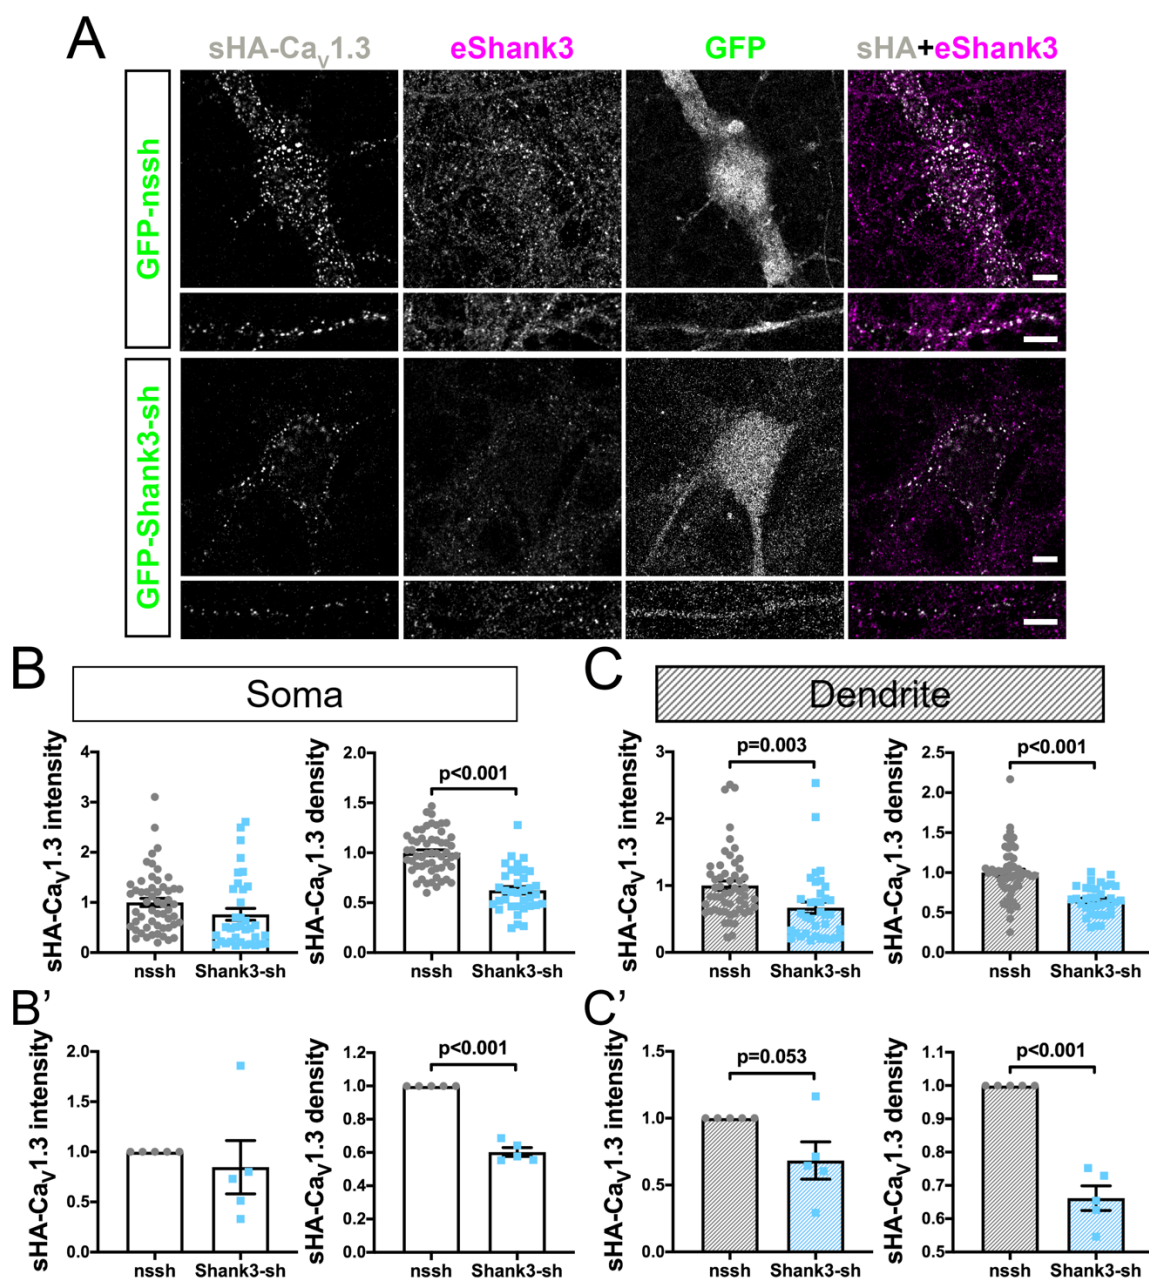

**Supplemental Figure 6** (related to Figure 10). Quantification of cluster density and intensity of surface localized sHA-Cav1.2 channels on soma or in dendrites in neuron co-expressing FLAG- $\beta$ 3. Data from Figure 10 were replotted by averaging the cluster intensity or density within each independent replicate and normalizing to values in neurons expressing the control shRNA (n=3 cultures/transfections, 7-10 cells per transfection). Comparisons made using a one-sample t-test.

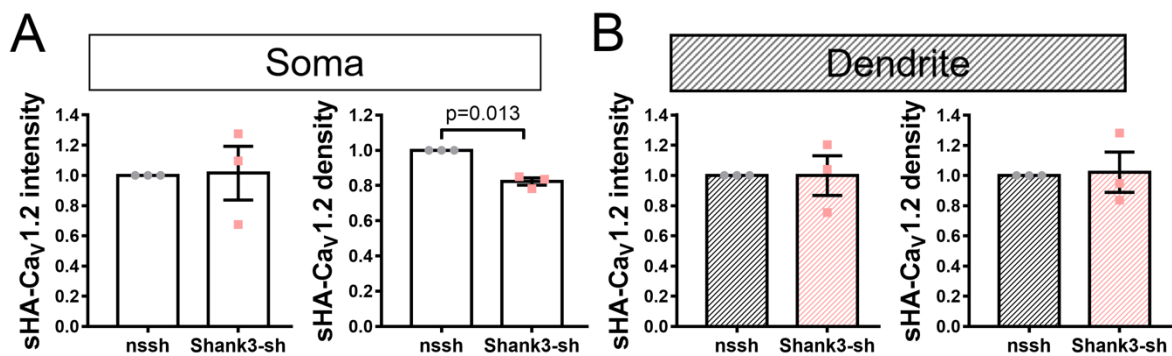

Supplemental Movie 1 (related to Figure 6). Live cell imaging of a representative HEK293 cell expressing mCherry-Cav1.3, FLAG-β3 and GFP under basal conditions.

Supplemental Movie 2 (related to Figure 6). Live cell imaging of a representative HEK293 cell expressing mCherry-Cav1.3, FLAG-β3 and GFP-Shank3 under basal conditions.

Supplemental Movie 3 (related to Figure 7). Live cell imaging of a representative HEK293 cell expressing mCherry-Cav1.3, FLAG-β3 and GFP-Shank3. Cell was imaged in “no Ca<sup>2+</sup>” buffer, following the addition of BayK 8644 (10 μM), and following the further addition of Ca<sup>2+</sup> (2.5 mM CaCl<sub>2</sub>).

Supplemental Movie 4 (related to Supplemental Figure 2). Live cell imaging of a representative HEK293 cell expressing mCherry-Cav1.3, FLAG-β2a and GFP-Shank3. Cell was imaged in “no Ca<sup>2+</sup>” buffer, following the addition of BayK 8644 (10 μM), and following the further addition of Ca<sup>2+</sup> (2.5 mM CaCl<sub>2</sub>).

Supplementary Table 1. The Prism output for the statistical analyses of data shown in the figures.

| <b>Figure 2B</b>                          |     | <b>Ordinary one-way ANOVA</b> |                       |              |         |                  |
|-------------------------------------------|-----|-------------------------------|-----------------------|--------------|---------|------------------|
| <b>ANOVA results</b>                      |     | <b>Shank3 in HA-IP</b>        |                       |              |         |                  |
| Table Analyzed                            |     | A-C                           |                       |              |         |                  |
| Data sets analyzed                        |     | A-C                           |                       |              |         |                  |
| ANOVA summary                             |     |                               |                       |              |         |                  |
| F                                         |     |                               | 14.84                 |              |         |                  |
| P value                                   |     |                               | 0.0002                |              |         |                  |
| P value summary                           |     | ***                           |                       |              |         |                  |
| Significant diff. among means (P < 0.05)? | Yes |                               |                       |              |         |                  |
| R square                                  |     |                               | 0.6225                |              |         |                  |
| <b>Multiple comparisons</b>               |     |                               |                       |              |         |                  |
| Number of families                        |     |                               | 1                     |              |         |                  |
| Number of comparisons per family          |     |                               | 3                     |              |         |                  |
| Alpha                                     |     |                               | 0.05                  |              |         |                  |
| <b>Tukey's multiple comparisons test</b>  |     | Mean Diff.                    | 95.00% CI of diff.    | Significant? | Summary | Adjusted P Value |
| - vs. <b>3</b>                            |     | -0.3492                       | -0.6977 to -0.0007469 | Yes          | *       | 0.0495 A-B       |
| - vs. <b>2a</b>                           |     | -0.7435                       | -1.092 to -0.3950     | Yes          | ***     | 0.0001 A-C       |
| <b>3 vs. 2a</b>                           |     | -0.3943                       | -0.7428 to -0.04578   | Yes          | *       | 0.0253 B-C       |



## Figure 2C

## Two-way ANOVA

## ANOVA results

Table Analyzed

## HA-CaV1.3 in HA-IP

| ANOVA table   | SS     | DF | MS     | F (DFn, DFd)      | P value  |
|---------------|--------|----|--------|-------------------|----------|
| Interaction   | 0.5518 | 2  | 0.2759 | F (2, 36) = 1.871 | P=0.1687 |
| Row Factor    | 0.8371 | 2  | 0.4186 | F (2, 36) = 2.838 | P=0.0717 |
| Column Factor | 4.654  | 1  | 4.654  | F (1, 36) = 31.56 | P<0.0001 |
| Residual      | 5.309  | 36 | 0.1475 |                   |          |

## Multiple comparisons

Compare each cell mean with the other cell mean in that row

|                                  |      |
|----------------------------------|------|
| Number of families               | 1    |
| Number of comparisons per family | 3    |
| Alpha                            | 0.05 |

## Sidak's multiple comparisons test

|             | Mean Diff. | 95.00% CI of diff. | Significant? | Summary | Adjusted P Value |
|-------------|------------|--------------------|--------------|---------|------------------|
| GFP - G-SK3 |            |                    |              |         |                  |
| -           | -0.4662    | -0.9801 to 0.04779 | No           | ns      | 0.0851           |
| <b>3</b>    | -0.5443    | -1.058 to -0.03030 | Yes          | *       | 0.0351           |
| <b>2a</b>   | -0.9868    | -1.501 to -0.4728  | Yes          | ****    | <0.0001          |

## Multiple comparisons

Within each column, compare rows (simple effects within columns)

|                                  |      |
|----------------------------------|------|
| Number of families               | 2    |
| Number of comparisons per family | 3    |
| Alpha                            | 0.05 |

## Tukey's multiple comparisons test

|                        | Mean Diff. | 95.00% CI of diff. | Significant? | Summary | Adjusted P Value |
|------------------------|------------|--------------------|--------------|---------|------------------|
| GFP                    |            |                    |              |         |                  |
| - vs. <b>3</b>         | -0.2174    | -0.7191 to 0.2843  | No           | ns      | 0.5452           |
| - vs. <b>2a</b>        | -0.06884   | -0.5706 to 0.4329  | No           | ns      | 0.94             |
| <b>3</b> vs. <b>2a</b> | 0.1485     | -0.3532 to 0.6503  | No           | ns      | 0.7512           |
| G-SK3                  |            |                    |              |         |                  |
| - vs. <b>3</b>         | -0.2955    | -0.7972 to 0.2063  | No           | ns      | 0.3319           |
| - vs. <b>2a</b>        | -0.5894    | -1.091 to -0.08772 | Yes          | *       | 0.0182           |
| <b>3</b> vs. <b>2a</b> | -0.294     | -0.7957 to 0.2077  | No           | ns      | 0.3354           |

| Figure 2E                                 |  | Ordinary one-way ANOVA    |        |
|-------------------------------------------|--|---------------------------|--------|
| ANOVA results                             |  | HA-CaV1.3 in GST-pulldown |        |
| Table Analyzed                            |  |                           |        |
| ANOVA summary                             |  |                           |        |
| F                                         |  |                           | 0.7931 |
| P value                                   |  |                           | 0.4748 |
| P value summary                           |  | ns                        |        |
| Significant diff. among means (P < 0.05)? |  | No                        |        |
| R square                                  |  |                           | 0.1167 |

| Multiple comparisons             |  |  |      |
|----------------------------------|--|--|------|
| Number of families               |  |  | 1    |
| Number of comparisons per family |  |  | 3    |
| Alpha                            |  |  | 0.05 |

| Tukey's multiple comparisons test |  | Mean Diff. | 95.00% CI of diff. | Significant? | Summary | Adjusted P Value |
|-----------------------------------|--|------------|--------------------|--------------|---------|------------------|
| - vs. <b>3</b>                    |  | -0.1975    | -0.9903 to 0.5952  | No           | ns      | 0.7877 A-B       |
| - vs. <b>2a</b>                   |  | -0.374     | -1.167 to 0.4187   | No           | ns      | 0.4435 A-C       |
| <b>3</b> vs. <b>2a</b>            |  | -0.1765    | -0.9693 to 0.6163  | No           | ns      | 0.8259 B-C       |

**Figure 3B Two-way ANOVA**

**ANOVA results**

Table Analyzed b subunit in GFP-SK3 IP

| ANOVA table   | SS (Type III) | DF | MS       | F (DFn, DFd)      | P value  |
|---------------|---------------|----|----------|-------------------|----------|
| Interaction   | 0.006421      | 1  | 0.006421 | F (1, 8) = 0.1156 | P=0.7427 |
| Row Factor    | 1.839         | 1  | 1.839    | F (1, 8) = 33.10  | P=0.0004 |
| Column Factor | 0.02966       | 1  | 0.02966  | F (1, 8) = 0.5338 | P=0.4858 |
| Residual      | 0.4445        | 8  | 0.05557  |                   |          |

**Multiple comparisons**

Compare each cell mean with the other cell mean in that column

|                                  |      |
|----------------------------------|------|
| Number of families               | 1    |
| Number of comparisons per family | 2    |
| Alpha                            | 0.05 |

| Sidak's multiple comparisons test | Mean Diff. | 95.00% CI of diff. | Significant? | Summary | Adjusted P Value |
|-----------------------------------|------------|--------------------|--------------|---------|------------------|
| <b>β3 - β2a</b>                   |            |                    |              |         |                  |
| <b>WT</b>                         | 0.7367     | 0.2087 to 1.265    | Yes          | *       | 0.01             |
| <b>ΔPDZ</b>                       | 0.8292     | 0.3012 to 1.357    | Yes          | **      | 0.0052           |

**Multiple comparisons**

Compare each cell mean with the other cell mean in that row

|                                  |      |
|----------------------------------|------|
| Number of families               | 1    |
| Number of comparisons per family | 2    |
| Alpha                            | 0.05 |

| Sidak's multiple comparisons test | Mean Diff. | 95.00% CI of diff. | Significant? | Summary | Adjusted P Value |
|-----------------------------------|------------|--------------------|--------------|---------|------------------|
| <b>WT - ΔPDZ</b>                  |            |                    |              |         |                  |
| <b>β3</b>                         | -0.1457    | -0.6737 to 0.3823  | No           | ns      | 0.7199           |
| <b>β2a</b>                        | -0.05317   | -0.5812 to 0.4748  | No           | ns      | 0.9556           |

**Figure 3D****ANOVA results**

Table Analyzed

**Two-way ANOVA****Shank3 in Flag-IP**

| ANOVA table   | SS        | DF | MS        | F (DFn, DFd)        | P value  |
|---------------|-----------|----|-----------|---------------------|----------|
| Interaction   | 0.0007282 | 1  | 0.0007282 | F (1, 12) = 0.01064 | P=0.9196 |
| Row Factor    | 0.05031   | 1  | 0.05031   | F (1, 12) = 0.7349  | P=0.4081 |
| Column Factor | 0.7376    | 1  | 0.7376    | F (1, 12) = 10.78   | P=0.0065 |
| Residual      | 0.8214    | 12 | 0.06845   |                     |          |

**Multiple comparisons**

Compare each cell mean with the other cell mean in that column

|                                  |      |
|----------------------------------|------|
| Number of families               | 1    |
| Number of comparisons per family | 2    |
| Alpha                            | 0.05 |

**Sidak's multiple comparisons test**

| Mean Diff.                                          | 95.00% CI of diff.        | Significant? | Summary | Adjusted P Value |
|-----------------------------------------------------|---------------------------|--------------|---------|------------------|
| <b><math>\beta 3</math> - <math>\beta 2a</math></b> |                           |              |         |                  |
| <b>WT</b>                                           | 0.09865 -0.3737 to 0.5710 | No           | ns      | 0.8429           |
| <b><math>\Delta PDZ</math></b>                      | 0.1256 -0.3467 to 0.5980  | No           | ns      | 0.7599           |

**Multiple comparisons**

Compare each cell mean with the other cell mean in that row

|                                  |      |
|----------------------------------|------|
| Number of families               | 1    |
| Number of comparisons per family | 2    |
| Alpha                            | 0.05 |

**Sidak's multiple comparisons test**

| Mean Diff.                          | 95.00% CI of diff.        | Significant? | Summary | Adjusted P Value |
|-------------------------------------|---------------------------|--------------|---------|------------------|
| <b>WT - <math>\Delta PDZ</math></b> |                           |              |         |                  |
| <b><math>\beta 3</math></b>         | 0.4159 -0.05641 to 0.8883 | No           | ns      | 0.0863           |
| <b><math>\beta 2a</math></b>        | 0.4429 -0.02943 to 0.9152 | No           | ns      | 0.0666           |

**Figure 4B****Ordinary one-way ANOVA****ANOVA results**

Table Analyzed

**Shank3 in HA-IP**

ANOVA summary

|                                           |         |        |
|-------------------------------------------|---------|--------|
| F                                         |         | 72.76  |
| P value                                   | <0.0001 |        |
| P value summary                           | ****    |        |
| Significant diff. among means (P < 0.05)? | Yes     |        |
| R square                                  |         | 0.9604 |

**Multiple comparisons**

|                                  |      |
|----------------------------------|------|
| Number of families               | 1    |
| Number of comparisons per family | 3    |
| Alpha                            | 0.05 |

**Tukey's multiple comparisons test**

|                     | Mean Diff. | 95.00% CI of diff. | Significant? | Summary | Adjusted P Value |
|---------------------|------------|--------------------|--------------|---------|------------------|
| - vs. WT            | -0.9067    | -1.156 to -0.6576  | Yes          | ****    | <0.0001 A-B      |
| - vs. $\Delta$ PDZ  | -0.133     | -0.3821 to 0.1161  | No           | ns      | 0.3017 A-C       |
| WT vs. $\Delta$ PDZ | 0.7737     | 0.5246 to 1.023    | Yes          | ***     | 0.0002 B-C       |

| Figure 4C                                 |     | Ordinary one-way ANOVA  |                    |              |         |                  |
|-------------------------------------------|-----|-------------------------|--------------------|--------------|---------|------------------|
| ANOVA results                             |     | mCherry-CaV1.3 in HA-IP |                    |              |         |                  |
| Table Analyzed                            |     |                         |                    |              |         |                  |
| ANOVA summary                             |     |                         |                    |              |         |                  |
| F                                         |     |                         |                    |              |         | 30.78            |
| P value                                   |     |                         |                    |              |         | 0.0007           |
| P value summary                           |     | ***                     |                    |              |         |                  |
| Significant diff. among means (P < 0.05)? | Yes |                         |                    |              |         |                  |
| R square                                  |     |                         |                    |              |         | 0.9112           |
| <b>Multiple comparisons</b>               |     |                         |                    |              |         |                  |
| Number of families                        |     |                         |                    |              |         | 1                |
| Number of comparisons per family          |     |                         |                    |              |         | 3                |
| Alpha                                     |     |                         |                    |              |         | 0.05             |
| <b>Tukey's multiple comparisons test</b>  |     | Mean Diff.              | 95.00% CI of diff. | Significant? | Summary | Adjusted P Value |
| - vs. WT                                  |     | -0.6654                 | -0.9537 to -0.3771 | Yes          | ***     | 0.001 A-B        |
| - vs. ΔPDZ                                |     | -0.05774                | -0.3461 to 0.2306  | No           | ns      | 0.8179 A-C       |
| WT vs. ΔPDZ                               |     | 0.6077                  | 0.3193 to 0.8960   | Yes          | **      | 0.0016 B-C       |

| <b>Figure 5B</b>                |      | <b>One sample t and Wilcoxon test</b> |  |
|---------------------------------|------|---------------------------------------|--|
| Table Analyzed                  |      | <b>GFP-Shank3 in HA IP</b>            |  |
|                                 | EDTA | Ca2+/CaM                              |  |
| Theoretical mean                | 1    | 1                                     |  |
| Actual mean                     | 1    | 0.1046                                |  |
| Number of values                | 6    | 6                                     |  |
| One sample t test               |      | Sample difference has zero SD         |  |
| t, df                           |      | t=19.56, df=5                         |  |
| P value (two tailed)            |      | <0.0001                               |  |
| P value summary                 |      | ****                                  |  |
| Significant (alpha=0.05)?       |      | Yes                                   |  |
| How big is the discrepancy?     |      |                                       |  |
| Discrepancy                     |      | -0.8954                               |  |
| SD of discrepancy               |      | 0.1121                                |  |
| SEM of discrepancy              |      | 0.04577                               |  |
| 95% confidence interval         |      | -1.013 to -0.7778                     |  |
| R squared (partial eta squared) |      | 0.9871                                |  |

**Figure 5C****ANOVA results**

Table Analyzed

**Two-way ANOVA****mCherry-CaV1.3 in HA-IP**

| ANOVA table   | SS | DF      | MS | F (DFn, DFd)              | P value  |
|---------------|----|---------|----|---------------------------|----------|
| Interaction   |    | 0.5261  | 1  | 0.5261 F (1, 20) = 25.29  | P<0.0001 |
| Row Factor    |    | 0.6381  | 1  | 0.6381 F (1, 20) = 30.67  | P<0.0001 |
| Column Factor |    | 0.05838 | 1  | 0.05838 F (1, 20) = 2.806 | P=0.1095 |
| Residual      |    | 0.4161  | 20 | 0.02081                   |          |

**Multiple comparisons**

Compare each cell mean with the other cell mean in that row

|                                  |      |
|----------------------------------|------|
| Number of families               | 1    |
| Number of comparisons per family | 2    |
| Alpha                            | 0.05 |

**Sidak's multiple comparisons test**

|                              | Mean Diff. | 95.00% CI of diff.  | Significant? | Summary | Adjusted P Value |
|------------------------------|------------|---------------------|--------------|---------|------------------|
| EDTA - Ca <sup>2+</sup> /CaM |            |                     |              |         |                  |
| GFP                          | -0.1975    | -0.3988 to 0.003812 | No           | ns      | 0.055            |
| GFP-Shank3                   | 0.3948     | 0.1935 to 0.5961    | Yes          | ***     | 0.0003           |

**Multiple comparisons**

Compare each cell mean with the other cell mean in that column

|                                  |      |
|----------------------------------|------|
| Number of families               | 1    |
| Number of comparisons per family | 2    |
| Alpha                            | 0.05 |

**Sidak's multiple comparisons test**

|                       | Mean Diff. | 95.00% CI of diff. | Significant? | Summary | Adjusted P Value |
|-----------------------|------------|--------------------|--------------|---------|------------------|
| GFP - GFP-Shank3      |            |                    |              |         |                  |
| EDTA                  | -0.6222    | -0.8235 to -0.4209 | Yes          | ****    | <0.0001          |
| Ca <sup>2+</sup> /CaM | -0.02998   | -0.2313 to 0.1713  | No           | ns      | 0.9231           |



| <b>Figure 6C</b>                       | <b>Unpaired t test</b>                           |        |
|----------------------------------------|--------------------------------------------------|--------|
| Table Analyzed                         | <b>mean intensity of mCherry-CaV1.3 clusters</b> |        |
| Column B                               | GFP-Shank3                                       |        |
| vs.                                    | vs.                                              |        |
| Column A                               | GFP                                              |        |
| Unpaired t test                        |                                                  |        |
| P value                                |                                                  | 0.0409 |
| P value summary                        | *                                                |        |
| Significantly different (P < 0.05)?    | Yes                                              |        |
| One- or two-tailed P value?            | Two-tailed                                       |        |
| t, df                                  | t=2.166, df=23                                   |        |
| How big is the difference?             |                                                  |        |
| Mean of column A                       |                                                  | 0.9955 |
| Mean of column B                       |                                                  | 1.548  |
| Difference between means (B - A) ± SEM | 0.5529 ± 0.2553                                  |        |
| 95% confidence interval                | 0.02481 to 1.081                                 |        |
| R squared (eta squared)                |                                                  | 0.1694 |
| F test to compare variances            |                                                  |        |
| F, DFn, Dfd                            | 7.088, 8, 15                                     |        |
| P value                                |                                                  | 0.0012 |
| P value summary                        | **                                               |        |
| Significantly different (P < 0.05)?    | Yes                                              |        |
| Data analyzed                          |                                                  |        |
| Sample size, column A                  |                                                  | 16     |
| Sample size, column B                  |                                                  | 9      |

| <b>Figure 6D</b>                       | <b>Unpaired t test</b>                       |  |
|----------------------------------------|----------------------------------------------|--|
| Table Analyzed                         | <b>mean speed of mCherry-CaV1.3 clusters</b> |  |
| Column B                               | GFP-Shank3                                   |  |
| vs.                                    | vs.                                          |  |
| Column A                               | GFP                                          |  |
| Unpaired t test                        |                                              |  |
| P value                                | <0.0001                                      |  |
| P value summary                        | ****                                         |  |
| Significantly different (P < 0.05)?    | Yes                                          |  |
| One- or two-tailed P value?            | Two-tailed                                   |  |
| t, df                                  | t=4.706, df=23                               |  |
| How big is the difference?             |                                              |  |
| Mean of column A                       | 0.2518                                       |  |
| Mean of column B                       | 0.1051                                       |  |
| Difference between means (B - A) ± SEM | -0.1467 ± 0.03116                            |  |
| 95% confidence interval                | -0.2111 to -0.08221                          |  |
| R squared (eta squared)                | 0.4906                                       |  |
| F test to compare variances            |                                              |  |
| F, DFn, Dfd                            | 2.763, 15, 8                                 |  |
| P value                                | 0.15                                         |  |
| P value summary                        | ns                                           |  |
| Significantly different (P < 0.05)?    | No                                           |  |
| Data analyzed                          |                                              |  |
| Sample size, column A                  | 16                                           |  |
| Sample size, column B                  | 9                                            |  |

| Figure 7C                                 |     | Ordinary one-way ANOVA                 |                    |              |         |                  |
|-------------------------------------------|-----|----------------------------------------|--------------------|--------------|---------|------------------|
| ANOVA results                             |     | Intensity of mCherry-CaV1.3_normalized |                    |              |         |                  |
| Table Analyzed                            |     |                                        |                    |              |         |                  |
| ANOVA summary                             |     |                                        |                    |              |         |                  |
| F                                         |     | 9.787                                  |                    |              |         |                  |
| P value                                   |     | 0.0005                                 |                    |              |         |                  |
| P value summary                           | *** |                                        |                    |              |         |                  |
| Significant diff. among means (P < 0.05)? | Yes |                                        |                    |              |         |                  |
| R square                                  |     | 0.3723                                 |                    |              |         |                  |
| Multiple comparisons                      |     |                                        |                    |              |         |                  |
| Number of families                        |     | 1                                      |                    |              |         |                  |
| Number of comparisons per family          |     | 3                                      |                    |              |         |                  |
| Alpha                                     |     | 0.05                                   |                    |              |         |                  |
| Tukey's multiple comparisons test         |     | Mean Diff.                             | 95.00% CI of diff. | Significant? | Summary | Adjusted P Value |
| 0 Ca2+ vs. 0 Ca2++BayK                    |     | -0.03236                               | -0.1669 to 0.1021  | No           | ns      | 0.8262 A-B       |
| 0 Ca2+ vs. BayK+Ca2+                      |     | 0.1919                                 | 0.05745 to 0.3264  | Yes          | **      | 0.0038 A-C       |
| 0 Ca2++BayK vs. BayK+Ca2+                 |     | 0.2243                                 | 0.08982 to 0.3588  | Yes          | ***     | 0.0007 B-C       |

| Figure 7D ANOVA results                            |                                       | Ordinary one-way ANOVA |                    |              |         |                  |
|----------------------------------------------------|---------------------------------------|------------------------|--------------------|--------------|---------|------------------|
| Table Analyzed                                     | ratio of mCherry-CaV1.3 to GFP-Shank3 |                        |                    |              |         |                  |
| ANOVA summary                                      |                                       |                        |                    |              |         |                  |
| F                                                  |                                       |                        |                    |              | 30.9    |                  |
| P value                                            |                                       | <0.0001                |                    |              |         |                  |
| P value summary                                    |                                       | ****                   |                    |              |         |                  |
| Significant diff. among means (P < 0.05)?          | Yes                                   |                        |                    |              |         |                  |
| R square                                           |                                       |                        |                    |              | 0.6519  |                  |
| Multiple comparisons                               |                                       |                        |                    |              |         |                  |
| Number of families                                 |                                       |                        |                    |              | 1       |                  |
| Number of comparisons per family                   |                                       |                        |                    |              | 3       |                  |
| Alpha                                              |                                       |                        |                    |              | 0.05    |                  |
| Tukey's multiple comparisons test                  |                                       | Mean Diff.             | 95.00% CI of diff. | Significant? | Summary | Adjusted P Value |
| 0 Ca <sup>2+</sup> vs. 0 Ca <sup>2+</sup> +BayK    |                                       | 0.02932                | -0.07901 to 0.1377 | No           | ns      | 0.7857 A-B       |
| 0 Ca <sup>2+</sup> vs. BayK+Ca <sup>2+</sup>       |                                       | 0.3141                 | 0.2058 to 0.4225   | Yes          | ****    | <0.0001 A-C      |
| 0 Ca <sup>2+</sup> +BayK vs. BayK+Ca <sup>2+</sup> |                                       | 0.2848                 | 0.1765 to 0.3932   | Yes          | ****    | <0.0001 B-C      |

**Figure 8B** **Two-way ANOVA**  
**ANOVA results**  
 Table Analyzed **mCherry Intensity-4 replicates**

| ANOVA table   | SS (Type III) | DF     | MS | F (DFn, DFd)             | P value  |
|---------------|---------------|--------|----|--------------------------|----------|
| Interaction   |               | 1.67   | 6  | 0.2783 F (6, 33) = 2.053 | P=0.0862 |
| Row Factor    |               | 0.8027 | 3  | 0.2676 F (3, 33) = 1.973 | P=0.1371 |
| Column Factor |               | 4.896  | 2  | 2.448 F (2, 33) = 18.05  | P<0.0001 |
| Residual      |               | 4.475  | 33 | 0.1356                   |          |

**Multiple comparisons**

Within each column, compare rows (simple effects within columns)

|                                  |      |
|----------------------------------|------|
| Number of families               | 3    |
| Number of comparisons per family | 6    |
| Alpha                            | 0.05 |

| Tukey's multiple comparisons test                    | Predicted (LS) mean diff. | 95.00% CI of diff. | Significant? | Summary | Adjusted P Value |
|------------------------------------------------------|---------------------------|--------------------|--------------|---------|------------------|
| <b>GFP</b>                                           |                           |                    |              |         |                  |
| <b>DMSO vs. BayK</b>                                 | 0.03122                   | -0.7295 to 0.7920  | No           | ns      | 0.9995           |
| <b>DMSO vs. Ca<sup>2+</sup>+DMSO</b>                 | -0.2117                   | -0.9160 to 0.4926  | No           | ns      | 0.8478           |
| <b>DMSO vs. Ca<sup>2+</sup>+BayK</b>                 | -0.2438                   | -0.9481 to 0.4605  | No           | ns      | 0.7857           |
| <b>BayK vs. Ca<sup>2+</sup>+DMSO</b>                 | -0.2429                   | -1.004 to 0.5178   | No           | ns      | 0.8233           |
| <b>BayK vs. Ca<sup>2+</sup>+BayK</b>                 | -0.275                    | -1.036 to 0.4857   | No           | ns      | 0.7629           |
| <b>Ca<sup>2+</sup>+DMSO vs. Ca<sup>2+</sup>+BayK</b> | -0.03206                  | -0.7364 to 0.6722  | No           | ns      | 0.9993           |
| <b>G-Shank3 WT</b>                                   |                           |                    |              |         |                  |
| <b>DMSO vs. BayK</b>                                 | -0.07326                  | -0.8340 to 0.6875  | No           | ns      | 0.9937           |
| <b>DMSO vs. Ca<sup>2+</sup>+DMSO</b>                 | -0.1399                   | -0.8442 to 0.5644  | No           | ns      | 0.9493           |
| <b>DMSO vs. Ca<sup>2+</sup>+BayK</b>                 | 0.7637                    | 0.05940 to 1.468   | Yes          | *       | 0.0294           |
| <b>BayK vs. Ca<sup>2+</sup>+DMSO</b>                 | -0.06666                  | -0.8274 to 0.6941  | No           | ns      | 0.9952           |
| <b>BayK vs. Ca<sup>2+</sup>+BayK</b>                 | 0.837                     | 0.07624 to 1.598   | Yes          | *       | 0.0265           |
| <b>Ca<sup>2+</sup>+DMSO vs. Ca<sup>2+</sup>+BayK</b> | 0.9036                    | 0.1993 to 1.608    | Yes          | **      | 0.0076           |
| <b>G-Shank3 ΔPDZ</b>                                 |                           |                    |              |         |                  |
| <b>DMSO vs. BayK</b>                                 | 0.13                      | -0.6307 to 0.8908  | No           | ns      | 0.9667           |
| <b>DMSO vs. Ca<sup>2+</sup>+DMSO</b>                 | -0.161                    | -0.8654 to 0.5433  | No           | ns      | 0.9254           |
| <b>DMSO vs. Ca<sup>2+</sup>+BayK</b>                 | 0.06166                   | -0.6426 to 0.7660  | No           | ns      | 0.9952           |
| <b>BayK vs. Ca<sup>2+</sup>+DMSO</b>                 | -0.2911                   | -1.052 to 0.4697   | No           | ns      | 0.7304           |
| <b>BayK vs. Ca<sup>2+</sup>+BayK</b>                 | -0.06835                  | -0.8291 to 0.6924  | No           | ns      | 0.9949           |
| <b>Ca<sup>2+</sup>+DMSO vs. Ca<sup>2+</sup>+BayK</b> | 0.2227                    | -0.4816 to 0.9270  | No           | ns      | 0.8275           |

**Multiple comparisons**

Within each row, compare columns (simple effects within rows)

|                                  |      |
|----------------------------------|------|
| Number of families               | 4    |
| Number of comparisons per family | 3    |
| Alpha                            | 0.05 |

| Tukey's multiple comparisons test    | Predicted (LS) mean diff. | 95.00% CI of diff. | Significant? | Summary | Adjusted P Value |
|--------------------------------------|---------------------------|--------------------|--------------|---------|------------------|
| <b>DMSO</b>                          |                           |                    |              |         |                  |
| <b>GFP vs. G-Shank3 WT</b>           | -0.9774                   | -1.616 to -0.3385  | Yes          | **      | 0.0019           |
| <b>GFP vs. G-Shank3 ΔPDZ</b>         | -0.1749                   | -0.8138 to 0.4641  | No           | ns      | 0.7815           |
| <b>G-Shank3 WT vs. G-Shank3 ΔPDZ</b> | 0.8026                    | 0.1637 to 1.441    | Yes          | *       | 0.0112           |
| <b>BayK</b>                          |                           |                    |              |         |                  |
| <b>GFP vs. G-Shank3 WT</b>           | -1.082                    | -1.820 to -0.3442  | Yes          | **      | 0.0029           |
| <b>GFP vs. G-Shank3 ΔPDZ</b>         | -0.07606                  | -0.8138 to 0.6617  | No           | ns      | 0.9654           |
| <b>G-Shank3 WT vs. G-Shank3 ΔPDZ</b> | 1.006                     | 0.2681 to 1.744    | Yes          | **      | 0.0057           |
| <b>Ca<sup>2+</sup>+DMSO</b>          |                           |                    |              |         |                  |
| <b>GFP vs. G-Shank3 WT</b>           | -0.9057                   | -1.545 to -0.2667  | Yes          | **      | 0.004            |
| <b>GFP vs. G-Shank3 ΔPDZ</b>         | -0.1242                   | -0.7631 to 0.5147  | No           | ns      | 0.8826           |
| <b>G-Shank3 WT vs. G-Shank3 ΔPDZ</b> | 0.7815                    | 0.1425 to 1.420    | Yes          | *       | 0.0137           |
| <b>Ca<sup>2+</sup>+BayK</b>          |                           |                    |              |         |                  |
| <b>GFP vs. G-Shank3 WT</b>           | 0.03005                   | -0.6089 to 0.6690  | No           | ns      | 0.9927           |
| <b>GFP vs. G-Shank3 ΔPDZ</b>         | 0.1306                    | -0.5083 to 0.7695  | No           | ns      | 0.8711           |
| <b>G-Shank3 WT vs. G-Shank3 ΔPDZ</b> | 0.1005                    | -0.5384 to 0.7394  | No           | ns      | 0.9213           |

**Figure 8C**

**Two-way ANOVA**

**ANOVA results**

Table Analyzed

**mCherry Density-4 replicates**

| ANOVA table   | SS (Type III) | DF    | MS | F (DFn, DFd)              | P value  |
|---------------|---------------|-------|----|---------------------------|----------|
| Interaction   |               | 2.644 | 6  | 0.4407 F (6, 33) = 0.4304 | P=0.8533 |
| Row Factor    |               | 2.404 | 3  | 0.8014 F (3, 33) = 0.7826 | P=0.5122 |
| Column Factor |               | 3.916 | 2  | 1.958 F (2, 33) = 1.912   | P=0.1638 |
| Residual      |               | 33.79 | 33 | 1.024                     |          |

**Multiple comparisons**

Within each column, compare rows (simple effects within columns)

|                                  |      |
|----------------------------------|------|
| Number of families               | 3    |
| Number of comparisons per family | 6    |
| Alpha                            | 0.05 |

**Tukey's multiple comparisons test**

Predicted (LS) mean diff. 95.00% CI of diff. Significant? Summary Adjusted P Value

**GFP**

|                                                   |         |                 |    |    |        |
|---------------------------------------------------|---------|-----------------|----|----|--------|
| DMSO vs. BayK                                     | 0.1909  | -1.900 to 2.282 | No | ns | 0.9946 |
| DMSO vs. Ca <sup>2+</sup> +DMSO                   | -0.4029 | -2.338 to 1.533 | No | ns | 0.9423 |
| DMSO vs. Ca <sup>2+</sup> +BayK                   | 0.08486 | -1.851 to 2.020 | No | ns | 0.9994 |
| BayK vs. Ca <sup>2+</sup> +DMSO                   | -0.5938 | -2.684 to 1.497 | No | ns | 0.8681 |
| BayK vs. Ca <sup>2+</sup> +BayK                   | -0.1061 | -2.197 to 1.985 | No | ns | 0.9991 |
| Ca <sup>2+</sup> +DMSO vs. Ca <sup>2+</sup> +BayK | 0.4878  | -1.448 to 2.423 | No | ns | 0.9033 |

**G-Shank3 WT**

|                                                   |         |                 |    |    |         |
|---------------------------------------------------|---------|-----------------|----|----|---------|
| DMSO vs. BayK                                     | 0.00343 | -2.087 to 2.094 | No | ns | >0.9999 |
| DMSO vs. Ca <sup>2+</sup> +DMSO                   | -0.3953 | -2.331 to 1.540 | No | ns | 0.9452  |
| DMSO vs. Ca <sup>2+</sup> +BayK                   | 0.1219  | -1.814 to 2.057 | No | ns | 0.9982  |
| BayK vs. Ca <sup>2+</sup> +DMSO                   | -0.3988 | -2.489 to 1.692 | No | ns | 0.9547  |
| BayK vs. Ca <sup>2+</sup> +BayK                   | 0.1185  | -1.972 to 2.209 | No | ns | 0.9987  |
| Ca <sup>2+</sup> +DMSO vs. Ca <sup>2+</sup> +BayK | 0.5173  | -1.418 to 2.453 | No | ns | 0.8872  |

**G-Shank3 ΔPDZ**

|                                                   |         |                  |    |    |        |
|---------------------------------------------------|---------|------------------|----|----|--------|
| DMSO vs. BayK                                     | -1.383  | -3.474 to 0.7076 | No | ns | 0.2963 |
| DMSO vs. Ca <sup>2+</sup> +DMSO                   | -0.8218 | -2.757 to 1.114  | No | ns | 0.6627 |
| DMSO vs. Ca <sup>2+</sup> +BayK                   | -0.3699 | -2.305 to 1.566  | No | ns | 0.9544 |
| BayK vs. Ca <sup>2+</sup> +DMSO                   | 0.5612  | -1.529 to 2.652  | No | ns | 0.8859 |
| BayK vs. Ca <sup>2+</sup> +BayK                   | 1.013   | -1.077 to 3.104  | No | ns | 0.5628 |
| Ca <sup>2+</sup> +DMSO vs. Ca <sup>2+</sup> +BayK | 0.4519  | -1.484 to 2.387  | No | ns | 0.9211 |

**Multiple comparisons**

Within each row, compare columns (simple effects within rows)

|                                  |      |
|----------------------------------|------|
| Number of families               | 4    |
| Number of comparisons per family | 3    |
| Alpha                            | 0.05 |

**Tukey's multiple comparisons test**

Predicted (LS) mean diff. 95.00% CI of diff. Significant? Summary Adjusted P Value

**DMSO**

|                               |        |                  |    |    |        |
|-------------------------------|--------|------------------|----|----|--------|
| GFP vs. G-Shank3 WT           | 0.7633 | -0.9925 to 2.519 | No | ns | 0.541  |
| GFP vs. G-Shank3 ΔPDZ         | 0.9504 | -0.8054 to 2.706 | No | ns | 0.3899 |
| G-Shank3 WT vs. G-Shank3 ΔPDZ | 0.1871 | -1.569 to 1.943  | No | ns | 0.963  |

**BayK**

|                               |         |                  |    |    |       |
|-------------------------------|---------|------------------|----|----|-------|
| GFP vs. G-Shank3 WT           | 0.5758  | -1.452 to 2.603  | No | ns | 0.767 |
| GFP vs. G-Shank3 ΔPDZ         | -0.6235 | -2.651 to 1.404  | No | ns | 0.733 |
| G-Shank3 WT vs. G-Shank3 ΔPDZ | -1.199  | -3.227 to 0.8281 | No | ns | 0.327 |

**Ca<sup>2+</sup>+DMSO**

|                               |         |                  |    |    |        |
|-------------------------------|---------|------------------|----|----|--------|
| GFP vs. G-Shank3 WT           | 0.7709  | -0.9849 to 2.527 | No | ns | 0.5346 |
| GFP vs. G-Shank3 ΔPDZ         | 0.5316  | -1.224 to 2.287  | No | ns | 0.74   |
| G-Shank3 WT vs. G-Shank3 ΔPDZ | -0.2393 | -1.995 to 1.516  | No | ns | 0.9403 |

**Ca<sup>2+</sup>+BayK**

|                               |         |                  |    |    |        |
|-------------------------------|---------|------------------|----|----|--------|
| GFP vs. G-Shank3 WT           | 0.8004  | -0.9554 to 2.556 | No | ns | 0.5097 |
| GFP vs. G-Shank3 ΔPDZ         | 0.4957  | -1.260 to 2.251  | No | ns | 0.7694 |
| G-Shank3 WT vs. G-Shank3 ΔPDZ | -0.3047 | -2.061 to 1.451  | No | ns | 0.9052 |

| Figure 8D      |  | Two-way ANOVA                             |          |    |              |                   |          |
|----------------|--|-------------------------------------------|----------|----|--------------|-------------------|----------|
| ANOVA results  |  | coloc of mCherry and GFP_ICQ-4 replicates |          |    |              |                   |          |
| Table Analyzed |  |                                           |          |    |              |                   |          |
| ANOVA table    |  | SS (Type III)                             | DF       | MS | F (DFn, DFd) | P value           |          |
| Interaction    |  |                                           | 0.01374  | 6  | 0.00229      | F (6, 33) = 1.546 | P=0.1943 |
| Row Factor     |  |                                           | 0.009751 | 3  | 0.00325      | F (3, 33) = 2.194 | P=0.1073 |
| Column Factor  |  |                                           | 0.1801   | 2  | 0.09006      | F (2, 33) = 60.79 | P<0.0001 |
| Residual       |  |                                           | 0.04889  | 33 | 0.001481     |                   |          |

  

| Multiple comparisons                                             |      |
|------------------------------------------------------------------|------|
| Within each column, compare rows (simple effects within columns) |      |
| Number of families                                               | 3    |
| Number of comparisons per family                                 | 6    |
| Alpha                                                            | 0.05 |

  

| Tukey's multiple comparisons test                    |  | Predicted (LS) mean diff. | 95.00% CI of diff.  | Significant? | Summary | Adjusted P Value |
|------------------------------------------------------|--|---------------------------|---------------------|--------------|---------|------------------|
| <b>GFP</b>                                           |  |                           |                     |              |         |                  |
| <b>DMSO vs. BayK</b>                                 |  |                           |                     |              |         |                  |
|                                                      |  | 0.0006854                 | -0.07883 to 0.08020 | No           | ns      | >0.9999          |
| <b>DMSO vs. Ca<sup>2+</sup>+DMSO</b>                 |  |                           |                     |              |         |                  |
|                                                      |  | -0.002546                 | -0.07616 to 0.07107 | No           | ns      | 0.9997           |
| <b>DMSO vs. Ca<sup>2+</sup>+BayK</b>                 |  |                           |                     |              |         |                  |
|                                                      |  | -0.005424                 | -0.07904 to 0.06819 | No           | ns      | 0.9971           |
| <b>BayK vs. Ca<sup>2+</sup>+DMSO</b>                 |  |                           |                     |              |         |                  |
|                                                      |  | -0.003231                 | -0.08275 to 0.07629 | No           | ns      | 0.9995           |
| <b>BayK vs. Ca<sup>2+</sup>+BayK</b>                 |  |                           |                     |              |         |                  |
|                                                      |  | -0.00611                  | -0.08563 to 0.07341 | No           | ns      | 0.9968           |
| <b>Ca<sup>2+</sup>+DMSO vs. Ca<sup>2+</sup>+BayK</b> |  |                           |                     |              |         |                  |
|                                                      |  | -0.002878                 | -0.07650 to 0.07074 | No           | ns      | 0.9996           |
| <b>G-Shank3 WT</b>                                   |  |                           |                     |              |         |                  |
| <b>DMSO vs. BayK</b>                                 |  |                           |                     |              |         |                  |
|                                                      |  | -0.001943                 | -0.08146 to 0.07757 | No           | ns      | 0.9999           |
| <b>DMSO vs. Ca<sup>2+</sup>+DMSO</b>                 |  |                           |                     |              |         |                  |
|                                                      |  | 0.03466                   | -0.03896 to 0.1083  | No           | ns      | 0.5858           |
| <b>DMSO vs. Ca<sup>2+</sup>+BayK</b>                 |  |                           |                     |              |         |                  |
|                                                      |  | 0.09297                   | 0.01935 to 0.1666   | Yes          | **      | 0.0088           |
| <b>BayK vs. Ca<sup>2+</sup>+DMSO</b>                 |  |                           |                     |              |         |                  |
|                                                      |  | 0.0366                    | -0.04292 to 0.1161  | No           | ns      | 0.6034           |
| <b>BayK vs. Ca<sup>2+</sup>+BayK</b>                 |  |                           |                     |              |         |                  |
|                                                      |  | 0.09491                   | 0.01539 to 0.1744   | Yes          | *       | 0.0142           |
| <b>Ca<sup>2+</sup>+DMSO vs. Ca<sup>2+</sup>+BayK</b> |  |                           |                     |              |         |                  |
|                                                      |  | 0.05831                   | -0.01531 to 0.1319  | No           | ns      | 0.161            |
| <b>G-Shank3 ΔPDZ</b>                                 |  |                           |                     |              |         |                  |
| <b>DMSO vs. BayK</b>                                 |  |                           |                     |              |         |                  |
|                                                      |  | -0.0067                   | -0.08622 to 0.07282 | No           | ns      | 0.9957           |
| <b>DMSO vs. Ca<sup>2+</sup>+DMSO</b>                 |  |                           |                     |              |         |                  |
|                                                      |  | 0.005939                  | -0.06768 to 0.07956 | No           | ns      | 0.9963           |
| <b>DMSO vs. Ca<sup>2+</sup>+BayK</b>                 |  |                           |                     |              |         |                  |
|                                                      |  | 0.01601                   | -0.05761 to 0.08963 | No           | ns      | 0.9349           |
| <b>BayK vs. Ca<sup>2+</sup>+DMSO</b>                 |  |                           |                     |              |         |                  |
|                                                      |  | 0.01264                   | -0.06688 to 0.09215 | No           | ns      | 0.9729           |
| <b>BayK vs. Ca<sup>2+</sup>+BayK</b>                 |  |                           |                     |              |         |                  |
|                                                      |  | 0.02271                   | -0.05680 to 0.1022  | No           | ns      | 0.8662           |
| <b>Ca<sup>2+</sup>+DMSO vs. Ca<sup>2+</sup>+BayK</b> |  |                           |                     |              |         |                  |
|                                                      |  | 0.01007                   | -0.06354 to 0.08369 | No           | ns      | 0.9824           |

  

| Multiple comparisons                                          |      |
|---------------------------------------------------------------|------|
| Within each row, compare columns (simple effects within rows) |      |
| Number of families                                            | 4    |
| Number of comparisons per family                              | 3    |
| Alpha                                                         | 0.05 |

  

| Tukey's multiple comparisons test    |  | Predicted (LS) mean diff. | 95.00% CI of diff.  | Significant? | Summary | Adjusted P Value |
|--------------------------------------|--|---------------------------|---------------------|--------------|---------|------------------|
| <b>DMSO</b>                          |  |                           |                     |              |         |                  |
| <b>GFP vs. G-Shank3 WT</b>           |  |                           |                     |              |         |                  |
|                                      |  | -0.1885                   | -0.2552 to -0.1217  | Yes          | ****    | <0.0001          |
| <b>GFP vs. G-Shank3 ΔPDZ</b>         |  |                           |                     |              |         |                  |
|                                      |  | -0.09825                  | -0.1650 to -0.03147 | Yes          | **      | 0.0028           |
| <b>G-Shank3 WT vs. G-Shank3 ΔPDZ</b> |  |                           |                     |              |         |                  |
|                                      |  | 0.0902                    | 0.02342 to 0.1570   | Yes          | **      | 0.0062           |
| <b>BayK</b>                          |  |                           |                     |              |         |                  |
| <b>GFP vs. G-Shank3 WT</b>           |  |                           |                     |              |         |                  |
|                                      |  | -0.1911                   | -0.2682 to -0.1140  | Yes          | ****    | <0.0001          |
| <b>GFP vs. G-Shank3 ΔPDZ</b>         |  |                           |                     |              |         |                  |
|                                      |  | -0.1056                   | -0.1827 to -0.02852 | Yes          | **      | 0.0055           |
| <b>G-Shank3 WT vs. G-Shank3 ΔPDZ</b> |  |                           |                     |              |         |                  |
|                                      |  | 0.08545                   | 0.008333 to 0.1626  | Yes          | *       | 0.0273           |
| <b>Ca<sup>2+</sup>+DMSO</b>          |  |                           |                     |              |         |                  |
| <b>GFP vs. G-Shank3 WT</b>           |  |                           |                     |              |         |                  |
|                                      |  | -0.1512                   | -0.2180 to -0.08446 | Yes          | ****    | <0.0001          |
| <b>GFP vs. G-Shank3 ΔPDZ</b>         |  |                           |                     |              |         |                  |
|                                      |  | -0.08976                  | -0.1565 to -0.02298 | Yes          | **      | 0.0064           |
| <b>G-Shank3 WT vs. G-Shank3 ΔPDZ</b> |  |                           |                     |              |         |                  |
|                                      |  | 0.06148                   | -0.005298 to 0.1283 | No           | ns      | 0.0761           |
| <b>Ca<sup>2+</sup>+BayK</b>          |  |                           |                     |              |         |                  |
| <b>GFP vs. G-Shank3 WT</b>           |  |                           |                     |              |         |                  |
|                                      |  | -0.09006                  | -0.1568 to -0.02328 | Yes          | **      | 0.0063           |
| <b>GFP vs. G-Shank3 ΔPDZ</b>         |  |                           |                     |              |         |                  |
|                                      |  | -0.07681                  | -0.1436 to -0.01003 | Yes          | *       | 0.0213           |
| <b>G-Shank3 WT vs. G-Shank3 ΔPDZ</b> |  |                           |                     |              |         |                  |
|                                      |  | 0.01325                   | -0.05353 to 0.08003 | No           | ns      | 0.878            |

| Figure 9B                              |                    | Unpaired t test                                 |  |
|----------------------------------------|--------------------|-------------------------------------------------|--|
| Table Analyzed                         |                    | sHA-CaV1.3 intensity on soma_beta3-3 replicates |  |
| Column B                               | Shank3-sh          |                                                 |  |
| vs.                                    | vs.                |                                                 |  |
| Column A                               | nssh               |                                                 |  |
| Unpaired t test                        |                    |                                                 |  |
| P value                                |                    | 0.0967                                          |  |
| P value summary                        | ns                 |                                                 |  |
| Significantly different (P < 0.05)?    | No                 |                                                 |  |
| One- or two-tailed P value?            | Two-tailed         |                                                 |  |
| t, df                                  | t=1.684, df=70     |                                                 |  |
| How big is the difference?             |                    |                                                 |  |
| Mean of column A                       |                    | 1                                               |  |
| Mean of column B                       |                    | 0.7675                                          |  |
| Difference between means (B - A) ± SEM | -0.2325 ± 0.1381   |                                                 |  |
| 95% confidence interval                | -0.5078 to 0.04291 |                                                 |  |
| R squared (eta squared)                |                    | 0.03892                                         |  |
| F test to compare variances            |                    |                                                 |  |
| F, DFn, Dfd                            | 1.242, 34, 36      |                                                 |  |
| P value                                |                    | 0.5224                                          |  |
| P value summary                        | ns                 |                                                 |  |
| Significantly different (P < 0.05)?    | No                 |                                                 |  |
| Data analyzed                          |                    |                                                 |  |
| Sample size, column A                  |                    | 37                                              |  |
| Sample size, column B                  |                    | 35                                              |  |

| Figure 9B                              |                    | Unpaired t test                               |  |
|----------------------------------------|--------------------|-----------------------------------------------|--|
| Table Analyzed                         |                    | sHA-CaV1.3 density on soma_beta3-3 replicates |  |
| Column B                               | Shank3-sh          |                                               |  |
| vs.                                    | vs.                |                                               |  |
| Column A                               | nssh               |                                               |  |
| Unpaired t test                        |                    |                                               |  |
| P value                                |                    | <0.0001                                       |  |
| P value summary                        | ****               |                                               |  |
| Significantly different (P < 0.05)?    | Yes                |                                               |  |
| One- or two-tailed P value?            | Two-tailed         |                                               |  |
| t, df                                  | t=5.232, df=70     |                                               |  |
| How big is the difference?             |                    |                                               |  |
| Mean of column A                       |                    | 1                                             |  |
| Mean of column B                       |                    | 0.6643                                        |  |
| Difference between means (B - A) ± SEM | -0.3357 ± 0.06417  |                                               |  |
| 95% confidence interval                | -0.4637 to -0.2077 |                                               |  |
| R squared (eta squared)                |                    | 0.2811                                        |  |
| F test to compare variances            |                    |                                               |  |
| F, DFn, Dfd                            | 1.190, 34, 36      |                                               |  |
| P value                                |                    | 0.6064                                        |  |
| P value summary                        | ns                 |                                               |  |
| Significantly different (P < 0.05)?    | No                 |                                               |  |
| Data analyzed                          |                    |                                               |  |
| Sample size, column A                  |                    | 37                                            |  |
| Sample size, column B                  |                    | 35                                            |  |



| <b>Figure 9C</b>                       |                    | <b>Unpaired t test</b>                                      |  |
|----------------------------------------|--------------------|-------------------------------------------------------------|--|
| Table Analyzed                         |                    | <b>sHA-CaV1.3 intensity in dendrites_beta3-3 replicates</b> |  |
| Column B                               | Shank3-sh          |                                                             |  |
| vs.                                    | vs.                |                                                             |  |
| Column A                               | nssh               |                                                             |  |
| Unpaired t test                        |                    |                                                             |  |
| P value                                |                    | 0.0003                                                      |  |
| P value summary                        | ***                |                                                             |  |
| Significantly different (P < 0.05)?    | Yes                |                                                             |  |
| One- or two-tailed P value?            | Two-tailed         |                                                             |  |
| t, df                                  | t=3.838, df=70     |                                                             |  |
| How big is the difference?             |                    |                                                             |  |
| Mean of column A                       |                    | 1                                                           |  |
| Mean of column B                       |                    | 0.6486                                                      |  |
| Difference between means (B - A) ± SEM | -0.3514 ± 0.09157  |                                                             |  |
| 95% confidence interval                | -0.5340 to -0.1688 |                                                             |  |
| R squared (eta squared)                |                    | 0.1738                                                      |  |
| F test to compare variances            |                    |                                                             |  |
| F, DFn, Dfd                            | 2.179, 36, 34      |                                                             |  |
| P value                                |                    | 0.0246                                                      |  |
| P value summary                        | *                  |                                                             |  |
| Significantly different (P < 0.05)?    | Yes                |                                                             |  |
| Data analyzed                          |                    |                                                             |  |
| Sample size, column A                  |                    | 37                                                          |  |
| Sample size, column B                  |                    | 35                                                          |  |

| <b>Figure 9C</b>                       |                    | <b>Unpaired t test</b>                                    |  |
|----------------------------------------|--------------------|-----------------------------------------------------------|--|
| Table Analyzed                         |                    | <b>sHA-CaV1.3 density in dendrites_beta3-3 replicates</b> |  |
| Column B                               | Shank3-sh          |                                                           |  |
| vs.                                    | vs.                |                                                           |  |
| Column A                               | nssh               |                                                           |  |
| Unpaired t test                        |                    |                                                           |  |
| P value                                |                    | <0.0001                                                   |  |
| P value summary                        | ****               |                                                           |  |
| Significantly different (P < 0.05)?    | Yes                |                                                           |  |
| One- or two-tailed P value?            | Two-tailed         |                                                           |  |
| t, df                                  | t=6.192, df=70     |                                                           |  |
| How big is the difference?             |                    |                                                           |  |
| Mean of column A                       |                    | 1                                                         |  |
| Mean of column B                       |                    | 0.6509                                                    |  |
| Difference between means (B - A) ± SEM | -0.3491 ± 0.05638  |                                                           |  |
| 95% confidence interval                | -0.4616 to -0.2367 |                                                           |  |
| R squared (eta squared)                |                    | 0.3539                                                    |  |
| F test to compare variances            |                    |                                                           |  |
| F, DFn, Dfd                            | 1.125, 36, 34      |                                                           |  |
| P value                                |                    | 0.7315                                                    |  |
| P value summary                        | ns                 |                                                           |  |
| Significantly different (P < 0.05)?    | No                 |                                                           |  |
| Data analyzed                          |                    |                                                           |  |
| Sample size, column A                  |                    | 37                                                        |  |
| Sample size, column B                  |                    | 35                                                        |  |

| Figure 10B                             |                   | Unpaired t test                             |  |
|----------------------------------------|-------------------|---------------------------------------------|--|
| Table Analyzed                         |                   | SHA1.2 intensity on soma_beta3-3 replicates |  |
| Column B                               | Shank3-sh         |                                             |  |
| vs.                                    | vs.               |                                             |  |
| Column A                               | nssh              |                                             |  |
| Unpaired t test                        |                   |                                             |  |
| P value                                |                   | 0.671                                       |  |
| P value summary                        | ns                |                                             |  |
| Significantly different (P < 0.05)?    | No                |                                             |  |
| One- or two-tailed P value?            | Two-tailed        |                                             |  |
| t, df                                  | t=0.4275, df=46   |                                             |  |
| How big is the difference?             |                   |                                             |  |
| Mean of column A                       |                   | 1                                           |  |
| Mean of column B                       |                   | 1.074                                       |  |
| Difference between means (B - A) ± SEM | 0.07352 ± 0.1720  |                                             |  |
| 95% confidence interval                | -0.2727 to 0.4197 |                                             |  |
| R squared (eta squared)                |                   | 0.003957                                    |  |
| F test to compare variances            |                   |                                             |  |
| F, DFn, Dfd                            | 1.378, 25, 21     |                                             |  |
| P value                                |                   | 0.4596                                      |  |
| P value summary                        | ns                |                                             |  |
| Significantly different (P < 0.05)?    | No                |                                             |  |
| Data analyzed                          |                   |                                             |  |
| Sample size, column A                  |                   | 26                                          |  |
| Sample size, column B                  |                   | 22                                          |  |

| Figure 10B                             |                     | Unpaired t test                           |  |
|----------------------------------------|---------------------|-------------------------------------------|--|
| Table Analyzed                         |                     | SHA1.2 density on soma_beta3-3 replicates |  |
| Column B                               | Shank3-sh           |                                           |  |
| vs.                                    | vs.                 |                                           |  |
| Column A                               | nssh                |                                           |  |
| Unpaired t test                        |                     |                                           |  |
| P value                                |                     | 0.0027                                    |  |
| P value summary                        | **                  |                                           |  |
| Significantly different (P < 0.05)?    | Yes                 |                                           |  |
| One- or two-tailed P value?            | Two-tailed          |                                           |  |
| t, df                                  | t=3.166, df=46      |                                           |  |
| How big is the difference?             |                     |                                           |  |
| Mean of column A                       |                     | 1                                         |  |
| Mean of column B                       |                     | 0.8292                                    |  |
| Difference between means (B - A) ± SEM | -0.1708 ± 0.05396   |                                           |  |
| 95% confidence interval                | -0.2794 to -0.06220 |                                           |  |
| R squared (eta squared)                |                     | 0.1789                                    |  |
| F test to compare variances            |                     |                                           |  |
| F, DFn, Dfd                            | 1.334, 25, 21       |                                           |  |
| P value                                |                     | 0.5063                                    |  |
| P value summary                        | ns                  |                                           |  |
| Significantly different (P < 0.05)?    | No                  |                                           |  |
| Data analyzed                          |                     |                                           |  |
| Sample size, column A                  |                     | 26                                        |  |
| Sample size, column B                  |                     | 22                                        |  |

| Figure 10C                             |                                                  | Unpaired t test |  |
|----------------------------------------|--------------------------------------------------|-----------------|--|
| Table Analyzed                         | SHA1.2 intensity in dendrites_beta3-3 replicates |                 |  |
| Column B                               | Shank3-sh                                        |                 |  |
| vs.                                    | vs.                                              |                 |  |
| Column A                               | nssh                                             |                 |  |
| Unpaired t test                        |                                                  |                 |  |
| P value                                | 0.8134                                           |                 |  |
| P value summary                        | ns                                               |                 |  |
| Significantly different (P < 0.05)?    | No                                               |                 |  |
| One- or two-tailed P value?            | Two-tailed                                       |                 |  |
| t, df                                  | t=0.2374, df=46                                  |                 |  |
| How big is the difference?             |                                                  |                 |  |
| Mean of column A                       | 1                                                |                 |  |
| Mean of column B                       | 1.042                                            |                 |  |
| Difference between means (B - A) ± SEM | 0.04161 ± 0.1753                                 |                 |  |
| 95% confidence interval                | -0.3112 to 0.3944                                |                 |  |
| R squared (eta squared)                | 0.001224                                         |                 |  |
| F test to compare variances            |                                                  |                 |  |
| F, DFn, Dfd                            | 1.588, 25, 21                                    |                 |  |
| P value                                | 0.2854                                           |                 |  |
| P value summary                        | ns                                               |                 |  |
| Significantly different (P < 0.05)?    | No                                               |                 |  |
| Data analyzed                          |                                                  |                 |  |
| Sample size, column A                  | 26                                               |                 |  |
| Sample size, column B                  | 22                                               |                 |  |

| Figure 10C                             |                                                | Unpaired t test |  |
|----------------------------------------|------------------------------------------------|-----------------|--|
| Table Analyzed                         | SHA1.2 density in dendrites_beta3-3 replicates |                 |  |
| Column B                               | Shank3-sh                                      |                 |  |
| vs.                                    | vs.                                            |                 |  |
| Column A                               | nssh                                           |                 |  |
| Unpaired t test                        |                                                |                 |  |
| P value                                | 0.4067                                         |                 |  |
| P value summary                        | ns                                             |                 |  |
| Significantly different (P < 0.05)?    | No                                             |                 |  |
| One- or two-tailed P value?            | Two-tailed                                     |                 |  |
| t, df                                  | t=0.8374, df=46                                |                 |  |
| How big is the difference?             |                                                |                 |  |
| Mean of column A                       | 1                                              |                 |  |
| Mean of column B                       | 1.059                                          |                 |  |
| Difference between means (B - A) ± SEM | 0.05910 ± 0.07057                              |                 |  |
| 95% confidence interval                | -0.08295 to 0.2012                             |                 |  |
| R squared (eta squared)                | 0.01502                                        |                 |  |
| F test to compare variances            |                                                |                 |  |
| F, DFn, Dfd                            | 3.593, 21, 25                                  |                 |  |
| P value                                | 0.0028                                         |                 |  |
| P value summary                        | **                                             |                 |  |
| Significantly different (P < 0.05)?    | Yes                                            |                 |  |
| Data analyzed                          |                                                |                 |  |
| Sample size, column A                  | 26                                             |                 |  |
| Sample size, column B                  | 22                                             |                 |  |

| <b>S Figure 3B</b>                     |                   | <b>Unpaired t test</b>                     |  |
|----------------------------------------|-------------------|--------------------------------------------|--|
| Table Analyzed                         |                   | <b>eShan3 intensity_beta3-3 replicates</b> |  |
| Column B                               | <b>Shank3-sh</b>  |                                            |  |
| vs.                                    | vs.               |                                            |  |
| Column A                               | <b>nssh</b>       |                                            |  |
| Unpaired t test                        |                   |                                            |  |
| P value                                | <0.0001           |                                            |  |
| P value summary                        | ****              |                                            |  |
| Significantly different (P < 0.05)?    | Yes               |                                            |  |
| One- or two-tailed P value?            | Two-tailed        |                                            |  |
| t, df                                  | t=6.899, df=35    |                                            |  |
| How big is the difference?             |                   |                                            |  |
| Mean of column A                       |                   | 1.186                                      |  |
| Mean of column B                       |                   | 0.2825                                     |  |
| Difference between means (B - A) ± SEM | -0.9038 ± 0.1310  |                                            |  |
| 95% confidence interval                | -1.170 to -0.6379 |                                            |  |
| R squared (eta squared)                |                   | 0.5762                                     |  |
| F test to compare variances            |                   |                                            |  |
| F, DFn, Dfd                            | 7.528, 15, 20     |                                            |  |
| P value                                | <0.0001           |                                            |  |
| P value summary                        | ****              |                                            |  |
| Significantly different (P < 0.05)?    | Yes               |                                            |  |
| Data analyzed                          |                   |                                            |  |
| Sample size, column A                  |                   | 16                                         |  |
| Sample size, column B                  |                   | 21                                         |  |

| <b>S Figure 3B</b>                     |                   | <b>Unpaired t test</b>                      |  |
|----------------------------------------|-------------------|---------------------------------------------|--|
| Table Analyzed                         |                   | <b>eShan3 intensity_beta2a-3 replicates</b> |  |
| Column B                               | <b>Shank3-sh</b>  |                                             |  |
| vs.                                    | vs.               |                                             |  |
| Column A                               | <b>nssh</b>       |                                             |  |
| Unpaired t test                        |                   |                                             |  |
| P value                                | <0.0001           |                                             |  |
| P value summary                        | ****              |                                             |  |
| Significantly different (P < 0.05)?    | Yes               |                                             |  |
| One- or two-tailed P value?            | Two-tailed        |                                             |  |
| t, df                                  | t=7.912, df=45    |                                             |  |
| How big is the difference?             |                   |                                             |  |
| Mean of column A                       |                   | 1.136                                       |  |
| Mean of column B                       |                   | 0.1687                                      |  |
| Difference between means (B - A) ± SEM | -0.9675 ± 0.1223  |                                             |  |
| 95% confidence interval                | -1.214 to -0.7212 |                                             |  |
| R squared (eta squared)                |                   | 0.5818                                      |  |
| F test to compare variances            |                   |                                             |  |
| F, DFn, Dfd                            | 14.63, 22, 23     |                                             |  |
| P value                                | <0.0001           |                                             |  |
| P value summary                        | ****              |                                             |  |
| Significantly different (P < 0.05)?    | Yes               |                                             |  |
| Data analyzed                          |                   |                                             |  |
| Sample size, column A                  |                   | 23                                          |  |
| Sample size, column B                  |                   | 24                                          |  |

| S Figure 4A                     |                                                    | One sample t and Wilcoxon test |                   |
|---------------------------------|----------------------------------------------------|--------------------------------|-------------------|
| Table Analyzed                  | sHA1.3 clustr intensity on soma_beta3-3 replicates |                                |                   |
|                                 | nssh                                               | Shank3-sh                      |                   |
| Theoretical mean                |                                                    | 1                              | 1                 |
| Actual mean                     |                                                    | 1                              | 0.7916            |
| Number of values                |                                                    | 3                              | 3                 |
| One sample t test               | Sample difference has zero SD                      |                                |                   |
| t, df                           |                                                    | t=1.343, df=2                  |                   |
| P value (two tailed)            |                                                    |                                | 0.3114            |
| P value summary                 |                                                    | ns                             |                   |
| Significant (alpha=0.05)?       |                                                    | No                             |                   |
| How big is the discrepancy?     |                                                    |                                |                   |
| Discrepancy                     |                                                    |                                | -0.2084           |
| SD of discrepancy               |                                                    |                                | 0.2688            |
| SEM of discrepancy              |                                                    |                                | 0.1552            |
| 95% confidence interval         |                                                    |                                | -0.8760 to 0.4593 |
| R squared (partial eta squared) |                                                    |                                | 0.4741            |

| S Figure 4A                     |                                                  | One sample t and Wilcoxon test |                    |
|---------------------------------|--------------------------------------------------|--------------------------------|--------------------|
| Table Analyzed                  | sHA1.3 clustr density on soma_beta3-3 replicates |                                |                    |
|                                 | nssh                                             | Shank3-sh                      |                    |
| Theoretical mean                |                                                  | 1                              | 1                  |
| Actual mean                     |                                                  | 1                              | 0.6629             |
| Number of values                |                                                  | 3                              | 3                  |
| One sample t test               | Sample difference has zero SD                    |                                |                    |
| t, df                           |                                                  | t=36.70, df=2                  |                    |
| P value (two tailed)            |                                                  |                                | 0.0007             |
| P value summary                 |                                                  | ***                            |                    |
| Significant (alpha=0.05)?       |                                                  | Yes                            |                    |
| How big is the discrepancy?     |                                                  |                                |                    |
| Discrepancy                     |                                                  |                                | -0.3371            |
| SD of discrepancy               |                                                  |                                | 0.01591            |
| SEM of discrepancy              |                                                  |                                | 0.009187           |
| 95% confidence interval         |                                                  |                                | -0.3767 to -0.2976 |
| R squared (partial eta squared) |                                                  |                                | 0.9985             |

| <b>S Figure 4B</b>              |                                                         | <b>One sample t and Wilcoxon test</b> |  |
|---------------------------------|---------------------------------------------------------|---------------------------------------|--|
| Table Analyzed                  | sHA1.3 clustr intensity in dendrites_beta3-3 replicates |                                       |  |
|                                 | nssh                                                    | Shank3-sh                             |  |
| Theoretical mean                | 1                                                       | 1                                     |  |
| Actual mean                     | 1                                                       | 0.6562                                |  |
| Number of values                | 3                                                       | 3                                     |  |
| One sample t test               | Sample difference has zero SD                           |                                       |  |
| t, df                           |                                                         | t=7.013, df=2                         |  |
| P value (two tailed)            |                                                         | 0.0197                                |  |
| P value summary                 |                                                         | *                                     |  |
| Significant (alpha=0.05)?       |                                                         | Yes                                   |  |
| How big is the discrepancy?     |                                                         |                                       |  |
| Discrepancy                     |                                                         | -0.3438                               |  |
| SD of discrepancy               |                                                         | 0.08492                               |  |
| SEM of discrepancy              |                                                         | 0.04903                               |  |
| 95% confidence interval         |                                                         | -0.5548 to -0.1329                    |  |
| R squared (partial eta squared) |                                                         | 0.9609                                |  |

| <b>S Figure 4B</b>              |                                                       | <b>One sample t and Wilcoxon test</b> |  |
|---------------------------------|-------------------------------------------------------|---------------------------------------|--|
| Table Analyzed                  | sHA1.3 clustr density in dendrites_beta3-3 replicates |                                       |  |
|                                 | nssh                                                  | Shank3-sh                             |  |
| Theoretical mean                | 1                                                     | 1                                     |  |
| Actual mean                     | 1                                                     | 0.6497                                |  |
| Number of values                | 3                                                     | 3                                     |  |
| One sample t test               | Sample difference has zero SD                         |                                       |  |
| t, df                           |                                                       | t=7.363, df=2                         |  |
| P value (two tailed)            |                                                       | 0.018                                 |  |
| P value summary                 |                                                       | *                                     |  |
| Significant (alpha=0.05)?       |                                                       | Yes                                   |  |
| How big is the discrepancy?     |                                                       |                                       |  |
| Discrepancy                     |                                                       | -0.3503                               |  |
| SD of discrepancy               |                                                       | 0.08241                               |  |
| SEM of discrepancy              |                                                       | 0.04758                               |  |
| 95% confidence interval         |                                                       | -0.5551 to -0.1456                    |  |
| R squared (partial eta squared) |                                                       | 0.9644                                |  |

| S Figure 5B                            |                    | Unpaired t test                              |  |
|----------------------------------------|--------------------|----------------------------------------------|--|
| Table Analyzed                         |                    | sHA1.3-intensity on soma_beta2a-5 replicates |  |
| Column B                               | Shank3-sh          |                                              |  |
| vs.                                    | vs.                |                                              |  |
| Column A                               | nssh               |                                              |  |
| Unpaired t test                        |                    |                                              |  |
| P value                                |                    | 0.0887                                       |  |
| P value summary                        | ns                 |                                              |  |
| Significantly different (P < 0.05)?    | No                 |                                              |  |
| One- or two-tailed P value?            | Two-tailed         |                                              |  |
| t, df                                  | t=1.721, df=89     |                                              |  |
| How big is the difference?             |                    |                                              |  |
| Mean of column A                       |                    | 1                                            |  |
| Mean of column B                       |                    | 0.7631                                       |  |
| Difference between means (B - A) ± SEM | -0.2369 ± 0.1377   |                                              |  |
| 95% confidence interval                | -0.5104 to 0.03659 |                                              |  |
| R squared (eta squared)                |                    | 0.03221                                      |  |
| F test to compare variances            |                    |                                              |  |
| F, DFn, Dfd                            | 1.422, 35, 54      |                                              |  |
| P value                                |                    | 0.2406                                       |  |
| P value summary                        | ns                 |                                              |  |
| Significantly different (P < 0.05)?    | No                 |                                              |  |
| Data analyzed                          |                    |                                              |  |
| Sample size, column A                  |                    | 55                                           |  |
| Sample size, column B                  |                    | 36                                           |  |

| S Figure 5B                            |                    | Unpaired t test                            |  |
|----------------------------------------|--------------------|--------------------------------------------|--|
| Table Analyzed                         |                    | sHA1.3-density on soma_beta2a-5 replicates |  |
| Column B                               | Shank3-sh          |                                            |  |
| vs.                                    | vs.                |                                            |  |
| Column A                               | nssh               |                                            |  |
| Unpaired t test                        |                    |                                            |  |
| P value                                |                    | <0.0001                                    |  |
| P value summary                        | ****               |                                            |  |
| Significantly different (P < 0.05)?    | Yes                |                                            |  |
| One- or two-tailed P value?            | Two-tailed         |                                            |  |
| t, df                                  | t=8.147, df=89     |                                            |  |
| How big is the difference?             |                    |                                            |  |
| Mean of column A                       |                    | 1                                          |  |
| Mean of column B                       |                    | 0.6247                                     |  |
| Difference between means (B - A) ± SEM | -0.3753 ± 0.04606  |                                            |  |
| 95% confidence interval                | -0.4668 to -0.2837 |                                            |  |
| R squared (eta squared)                |                    | 0.4272                                     |  |
| F test to compare variances            |                    |                                            |  |
| F, DFn, Dfd                            | 1.073, 35, 54      |                                            |  |
| P value                                |                    | 0.8026                                     |  |
| P value summary                        | ns                 |                                            |  |
| Significantly different (P < 0.05)?    | No                 |                                            |  |
| Data analyzed                          |                    |                                            |  |
| Sample size, column A                  |                    | 55                                         |  |
| Sample size, column B                  |                    | 36                                         |  |

| S Figure 5B'                    |                                                      | One sample t and Wilcoxon test |                   |
|---------------------------------|------------------------------------------------------|--------------------------------|-------------------|
| Table Analyzed                  | SHA1.3 clusetr intensity on soma_beta2a-5 replicates | Shank3-sh                      |                   |
|                                 | nssh                                                 |                                |                   |
| Theoretical mean                |                                                      | 1                              | 1                 |
| Actual mean                     |                                                      | 1                              | 0.8469            |
| Number of values                |                                                      | 5                              | 5                 |
| One sample t test               | Sample difference has zero SD                        |                                |                   |
| t, df                           |                                                      | t=0.5754, df=4                 |                   |
| P value (two tailed)            |                                                      |                                | 0.5958            |
| P value summary                 |                                                      | ns                             |                   |
| Significant (alpha=0.05)?       |                                                      | No                             |                   |
| How big is the discrepancy?     |                                                      |                                |                   |
| Discrepancy                     |                                                      |                                | -0.1531           |
| SD of discrepancy               |                                                      |                                | 0.595             |
| SEM of discrepancy              |                                                      |                                | 0.2661            |
| 95% confidence interval         |                                                      |                                | -0.8919 to 0.5857 |
| R squared (partial eta squared) |                                                      |                                | 0.07645           |

| S Figure 5B'                    |                                                    | One sample t and Wilcoxon test |                    |
|---------------------------------|----------------------------------------------------|--------------------------------|--------------------|
| Table Analyzed                  | sHA1.3 clusetr density on soma_beta2a-5 replicates | Shank3-sh                      |                    |
|                                 | nssh                                               |                                |                    |
| Theoretical mean                |                                                    | 1                              | 1                  |
| Actual mean                     |                                                    | 1                              | 0.6028             |
| Number of values                |                                                    | 5                              | 5                  |
| One sample t test               | Sample difference has zero SD                      |                                |                    |
| t, df                           |                                                    | t=15.02, df=4                  |                    |
| P value (two tailed)            |                                                    |                                | 0.0001             |
| P value summary                 |                                                    | ***                            |                    |
| Significant (alpha=0.05)?       |                                                    | Yes                            |                    |
| How big is the discrepancy?     |                                                    |                                |                    |
| Discrepancy                     |                                                    |                                | -0.3972            |
| SD of discrepancy               |                                                    |                                | 0.05913            |
| SEM of discrepancy              |                                                    |                                | 0.02645            |
| 95% confidence interval         |                                                    |                                | -0.4706 to -0.3238 |
| R squared (partial eta squared) |                                                    |                                | 0.9826             |



| S Figure 5C                            |  | Unpaired t test                                   |  |
|----------------------------------------|--|---------------------------------------------------|--|
| Table Analyzed                         |  | sHA1.3-intensity in dendrites_beta2a-5 replicates |  |
| Column B                               |  | Shank3-sh                                         |  |
| vs.                                    |  | vs.                                               |  |
| Column A                               |  | nssh                                              |  |
| Unpaired t test                        |  |                                                   |  |
| P value                                |  | 0.0032                                            |  |
| P value summary                        |  | **                                                |  |
| Significantly different (P < 0.05)?    |  | Yes                                               |  |
| One- or two-tailed P value?            |  | Two-tailed                                        |  |
| t, df                                  |  | t=3.036, df=88                                    |  |
| How big is the difference?             |  |                                                   |  |
| Mean of column A                       |  | 1                                                 |  |
| Mean of column B                       |  | 0.6683                                            |  |
| Difference between means (B - A) ± SEM |  | -0.3317 ± 0.1093                                  |  |
| 95% confidence interval                |  | -0.5488 to -0.1145                                |  |
| R squared (eta squared)                |  | 0.09479                                           |  |
| F test to compare variances            |  |                                                   |  |
| F, DFn, Dfd                            |  | 1.035, 35, 53                                     |  |
| P value                                |  | 0.8945                                            |  |
| P value summary                        |  | ns                                                |  |
| Significantly different (P < 0.05)?    |  | No                                                |  |
| Data analyzed                          |  |                                                   |  |
| Sample size, column A                  |  | 54                                                |  |
| Sample size, column B                  |  | 36                                                |  |

| S Figure 5C                            |  | Unpaired t test                                 |  |
|----------------------------------------|--|-------------------------------------------------|--|
| Table Analyzed                         |  | sHA1.3-density in dendrites_beta2a-5 replicates |  |
| Column B                               |  | Shank3-sh                                       |  |
| vs.                                    |  | vs.                                             |  |
| Column A                               |  | nssh                                            |  |
| Unpaired t test                        |  |                                                 |  |
| P value                                |  | <0.0001                                         |  |
| P value summary                        |  | ****                                            |  |
| Significantly different (P < 0.05)?    |  | Yes                                             |  |
| One- or two-tailed P value?            |  | Two-tailed                                      |  |
| t, df                                  |  | t=5.991, df=88                                  |  |
| How big is the difference?             |  |                                                 |  |
| Mean of column A                       |  | 1                                               |  |
| Mean of column B                       |  | 0.6531                                          |  |
| Difference between means (B - A) ± SEM |  | -0.3469 ± 0.05791                               |  |
| 95% confidence interval                |  | -0.4620 to -0.2318                              |  |
| R squared (eta squared)                |  | 0.2897                                          |  |
| F test to compare variances            |  |                                                 |  |
| F, DFn, Dfd                            |  | 3.087, 53, 35                                   |  |
| P value                                |  | 0.0007                                          |  |
| P value summary                        |  | ***                                             |  |
| Significantly different (P < 0.05)?    |  | Yes                                             |  |
| Data analyzed                          |  |                                                 |  |
| Sample size, column A                  |  | 54                                              |  |
| Sample size, column B                  |  | 36                                              |  |

| S Figure 5C"                    |                                                          | One sample t and Wilcoxon test |   |
|---------------------------------|----------------------------------------------------------|--------------------------------|---|
| Table Analyzed                  | sHA1.3 clustr intensity in dendrites_beta2a-5 replicates |                                |   |
| Theoretical mean                | 1                                                        |                                | 1 |
| Actual mean                     | 1                                                        | 0.6836                         |   |
| Number of values                | 5                                                        |                                | 5 |
| One sample t test               | Sample difference has zero SD                            |                                |   |
| t, df                           |                                                          | t=2.263, df=4                  |   |
| P value (two tailed)            |                                                          | 0.0864                         |   |
| P value summary                 | ns                                                       |                                |   |
| Significant (alpha=0.05)?       | No                                                       |                                |   |
| How big is the discrepancy?     |                                                          |                                |   |
| Discrepancy                     |                                                          | -0.3164                        |   |
| SD of discrepancy               |                                                          | 0.3126                         |   |
| SEM of discrepancy              |                                                          | 0.1398                         |   |
| 95% confidence interval         |                                                          | -0.7046 to 0.07177             |   |
| R squared (partial eta squared) |                                                          | 0.5615                         |   |

| S Figure 5C"                    |                                                        | One sample t and Wilcoxon test |   |
|---------------------------------|--------------------------------------------------------|--------------------------------|---|
| Table Analyzed                  | sHA1.3 clustr density in dendrites_beta2a-5 replicates |                                |   |
| Theoretical mean                | 1                                                      |                                | 1 |
| Actual mean                     | 1                                                      | 0.6616                         |   |
| Number of values                | 5                                                      |                                | 5 |
| One sample t test               | Sample difference has zero SD                          |                                |   |
| t, df                           |                                                        | t=9.132, df=4                  |   |
| P value (two tailed)            |                                                        | 0.0008                         |   |
| P value summary                 | ***                                                    |                                |   |
| Significant (alpha=0.05)?       | Yes                                                    |                                |   |
| How big is the discrepancy?     |                                                        |                                |   |
| Discrepancy                     |                                                        | -0.3384                        |   |
| SD of discrepancy               |                                                        | 0.08287                        |   |
| SEM of discrepancy              |                                                        | 0.03706                        |   |
| 95% confidence interval         |                                                        | -0.4413 to -0.2355             |   |
| R squared (partial eta squared) |                                                        | 0.9542                         |   |

| S Figure 6A                     |                                                    | One sample t and Wilcoxon test |                   |
|---------------------------------|----------------------------------------------------|--------------------------------|-------------------|
| Table Analyzed                  | SHA1.2 cluستر intensity on soma_beta3-3 replicates | Shank3-sh                      |                   |
|                                 | nssh                                               |                                |                   |
| Theoretical mean                |                                                    | 1                              | 1                 |
| Actual mean                     |                                                    | 1                              | 1.015             |
| Number of values                |                                                    | 3                              | 3                 |
| One sample t test               | Sample difference has zero SD                      |                                |                   |
| t, df                           |                                                    | t=0.08556, df=2                |                   |
| P value (two tailed)            |                                                    |                                | 0.9396            |
| P value summary                 |                                                    | ns                             |                   |
| Significant (alpha=0.05)?       |                                                    | No                             |                   |
| How big is the discrepancy?     |                                                    |                                |                   |
| Discrepancy                     |                                                    |                                | 0.01524           |
| SD of discrepancy               |                                                    |                                | 0.3084            |
| SEM of discrepancy              |                                                    |                                | 0.1781            |
| 95% confidence interval         |                                                    |                                | -0.7510 to 0.7814 |
| R squared (partial eta squared) |                                                    |                                | 0.003647          |

| S Figure 6A                     |                                                  | One sample t and Wilcoxon test |                     |
|---------------------------------|--------------------------------------------------|--------------------------------|---------------------|
| Table Analyzed                  | SHA1.2 cluستر density on soma_beta3-3 replicates | Shank3-sh                      |                     |
|                                 | nssh                                             |                                |                     |
| Theoretical mean                |                                                  | 1                              | 1                   |
| Actual mean                     |                                                  | 1                              | 0.8231              |
| Number of values                |                                                  | 3                              | 3                   |
| One sample t test               | Sample difference has zero SD                    |                                |                     |
| t, df                           |                                                  | t=8.576, df=2                  |                     |
| P value (two tailed)            |                                                  |                                | 0.0133              |
| P value summary                 |                                                  | *                              |                     |
| Significant (alpha=0.05)?       |                                                  | Yes                            |                     |
| How big is the discrepancy?     |                                                  |                                |                     |
| Discrepancy                     |                                                  |                                | -0.1769             |
| SD of discrepancy               |                                                  |                                | 0.03574             |
| SEM of discrepancy              |                                                  |                                | 0.02063             |
| 95% confidence interval         |                                                  |                                | -0.2657 to -0.08817 |
| R squared (partial eta squared) |                                                  |                                | 0.9735              |

| S Figure 6B                     |                                                         | One sample t and Wilcoxon test |        |
|---------------------------------|---------------------------------------------------------|--------------------------------|--------|
| Table Analyzed                  | SHA1.2 clustr intensity in dendrites_beta3-3 replicates | Shank3-sh                      |        |
|                                 | nssh                                                    |                                |        |
| Theoretical mean                |                                                         | 1                              | 1      |
| Actual mean                     |                                                         | 1                              | 0.9989 |
| Number of values                |                                                         | 3                              | 3      |
| One sample t test               | Sample difference has zero SD                           |                                |        |
| t, df                           |                                                         | t=0.008346, df=2               |        |
| P value (two tailed)            |                                                         |                                | 0.9941 |
| P value summary                 |                                                         | ns                             |        |
| Significant (alpha=0.05)?       |                                                         | No                             |        |
| How big is the discrepancy?     |                                                         |                                |        |
| Discrepancy                     |                                                         | -0.001096                      |        |
| SD of discrepancy               |                                                         | 0.2275                         |        |
| SEM of discrepancy              |                                                         | 0.1313                         |        |
| 95% confidence interval         |                                                         | -0.5661 to 0.5639              |        |
| R squared (partial eta squared) |                                                         | 0.00003483                     |        |

| S Figure 6B                     |                                                       | One sample t and Wilcoxon test |                   |
|---------------------------------|-------------------------------------------------------|--------------------------------|-------------------|
| Table Analyzed                  | SHA1.2 clustr density in dendrites_beta3-3 replicates | Shank3-sh                      |                   |
|                                 | nssh                                                  |                                |                   |
| Theoretical mean                |                                                       | 1                              | 1                 |
| Actual mean                     |                                                       | 1                              | 1.022             |
| Number of values                |                                                       | 3                              | 3                 |
| One sample t test               | Sample difference has zero SD                         |                                |                   |
| t, df                           |                                                       | t=0.1658, df=2                 |                   |
| P value (two tailed)            |                                                       |                                | 0.8835            |
| P value summary                 |                                                       | ns                             |                   |
| Significant (alpha=0.05)?       |                                                       | No                             |                   |
| How big is the discrepancy?     |                                                       |                                |                   |
| Discrepancy                     |                                                       |                                | 0.02214           |
| SD of discrepancy               |                                                       |                                | 0.2312            |
| SEM of discrepancy              |                                                       |                                | 0.1335            |
| 95% confidence interval         |                                                       |                                | -0.5523 to 0.5965 |
| R squared (partial eta squared) |                                                       |                                | 0.01357           |
